# Supplementary material for: Total synthesis of cynaropicrin
Source: Royal Society of Chemistry journal article supplement (doi:10.1039/d1ob00657f), 2021-01-01

*Electronic Supplementary Information*

## **Total synthesis of cynaropicrin**

Tenma Nakamura, Dinda B. Pitna, Kogaku Kimura, Yukiko Yoshimoto, Tomoya Uchiyama,  
Takaya Mori, Ryosuke Kondo, Shihori Hara, Yuki Egoshi, Shoya Yamaguchi, Noriyuki  
Suzuki, Yumiko Suzuki, and Toyonobu Usuki\*

*Department of Materials and Life Sciences, Faculty of Science and Technology, Sophia  
University, 7-1 Kioicho, Chiyoda-ku, Tokyo 102-8554, Japan*

E-mail: [t-usuki@sophia.ac.jp](mailto:t-usuki@sophia.ac.jp)

### **Table of Contents**

S2-S24: Experimental

S25: Scheme S1

S26-S60: NMR spectra

S61-S65: X-ray

S66: DFT calculation

**General:**

All non-aqueous reactions were conducted under an atmosphere of nitrogen with magnetic stirring unless otherwise indicated. Dichloromethane (CH<sub>2</sub>Cl<sub>2</sub>), methanol (MeOH), tetrahydrofuran (THF), ethanol (EtOH), and toluene were purchased from commercial suppliers and stored over activated molecular sieves. All reagents were obtained from commercial suppliers and used without further purification unless otherwise stated. Dess-Martin Periodinane (DMP) and pyridinium *p*-toluenesulfonate (PPTS) was prepared according to literature procedure. For the photo oxygenation reaction, a Shimadzu AT-100HG halogen lamp was used. Analytical thin layer chromatography (TLC) was performed on Silica gel 60 F<sub>254</sub> plates produced by Merck. Column chromatography was performed with acidic Silica gel 60 (spherical, 40-50 μm) or neutral Silica gel 60N (spherical, 40-50 μm) produced by Kanto Chemicals (Tokyo, Japan). Removal of small amount of solvent was performed by Smart Evaporator CEV1-SQ-P2, CEVI-SK-P2, CEV1A-GR-P2 (Biochromato, Kanagawa, Japan).

Optical rotations were measured on a JASCO P-2200 digital polarimeter at the sodium lamp ( $\lambda = 589$  nm) D line and are reported as follows:  $[\alpha]_D^{25}$  (*c* g/100 mL, solvent). <sup>1</sup>H and <sup>13</sup>C nuclear magnetic resonance (NMR) spectra were recorded on a JEOL JNM-ECA 500 spectrometer (500 MHz) or BRUKER AVANCE III HD (400 MHz). <sup>1</sup>H NMR data are reported as follows: chemical shift ( $\delta$ , ppm), integration, multiplicity (s, singlet; d, doublet; t, triplet; q, quartet; m, multiplet), coupling constants (*J*) in Hz, assignments. <sup>13</sup>C NMR data are reported in terms of chemical shift ( $\delta$ , ppm). Electrospray ionization-mass spectrometer (ESI-MS) spectra were recorded on a JEOL JMS-T100LC instrument and are reported in mass-to-charge ratio (*m/z*).

The carbon numberings on NMR of all compounds are corresponding with cynaropicrin **1** or (*R*)-7-hydroxycarvone **9**.

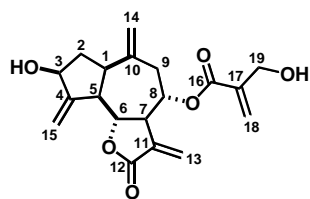

cynaropicrin (1)

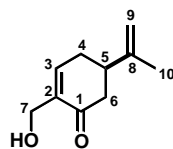

(R)-7-hydroxycarvone (9)

**(2R, 3R, 5R)-2-Chloro-3-hydroxy-2-hydroxymethyl-5-isopropenyl-cyclohexanone (12):**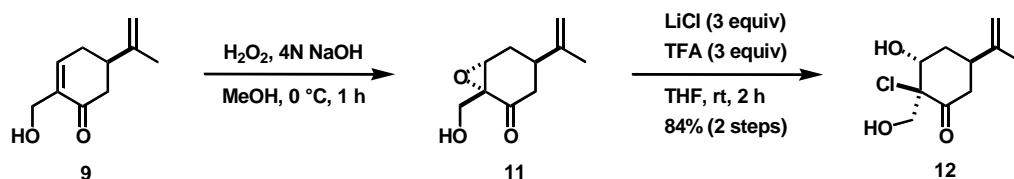

To a solution of **9** (431.4 mg, 2.60 mmol, 1.0 equiv) and 4N NaOH solution (195  $\mu$ L, 0.3 equiv), in MeOH (6.4 mL) to cooled at 0 °C was added 30% H<sub>2</sub>O<sub>2</sub> (3.6 mL, large excess) dropwise. After stirring for 1 h at 0 °C, the reaction mixture was diluted with EtOAc and quenched with saturated Na<sub>2</sub>SO<sub>3</sub> solution. The aqueous layer was then extracted with EtOAc. The combined organic layers were washed with brine, dried over Na<sub>2</sub>SO<sub>4</sub>, and concentrated *in vacuo* afforded the product **11** as a yellow oil, and the residue was used for the second step without further purification; **11**: *R<sub>f</sub>* 0.62 (hexane/EtOAc = 1:2).

Next, the residue **11** and LiCl (326.8 mg, 7.79 mmol, 3.0 equiv) in THF (20 mL) cooled to 0 °C was added CF<sub>3</sub>COOH (596  $\mu$ L, 7.79 mmol, 3.0 equiv) dropwise. After stirring at room temperature for 2 h, the reaction mixture was diluted with EtOAc and quenched with saturated NaHCO<sub>3</sub> solution. The aqueous layer was then extracted with EtOAc. The combined organic layers were washed with brine, dried over Na<sub>2</sub>SO<sub>4</sub>, and concentrated *in vacuo*. Purification on silica gel column chromatography (hexane/EtOAc = 4:1) afforded **12** as a yellow oil (474.0 mg, 2.17 mmol, 84% (2 steps)); *R<sub>f</sub>* 0.70 (hexane/EtOAc = 1:2); [ $\alpha$ ]<sub>D</sub><sup>25</sup> +86.9 (*c* 0.1, MeOH); <sup>1</sup>H NMR (400 MHz, CDCl<sub>3</sub>)  $\delta$  4.82 (2H, d, *J* = 6.6 Hz, H9), 4.52 (1H, t, *J* = 2.7 Hz, H3), 4.37 (1H, d, *J* = 12.6 Hz, H7), 3.88 (1H, d, *J* = 12.6 Hz, H7), 3.07-2.92 (2H, m, H6), 2.43-2.39 (1H, m, H5), 2.33-2.23 (1H, m, H4), 2.02-1.95 (1H, m, H4), 1.78 (3H, s, H10); <sup>13</sup>C NMR (100 MHz, CDCl<sub>3</sub>)  $\delta$  207.2, 146.5, 110.8, 67.1, 66.3, 41.9, 39.7, 39.5, 33.0, 20.5; ESI-HRMS (*m/z*) calcd for C<sub>10</sub>H<sub>15</sub>ClNaO<sub>3</sub> [*M*+Na] 241.0607, found 241.0598.

**(2*S*,3*R*,5*R*)-2-Chloro-5-isopropenyl-3-(tetrahydro-pyran-2-yloxy)-2-(tetrahydro-pyran-2-yloxymethyl)-cyclohexanone (13):**

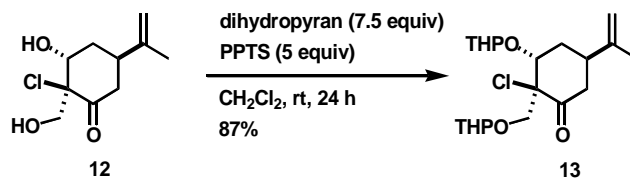

To a solution of **12** (52.7 mg, 0.241 mmol, 1.0 eq) and PPTS (302.8 mg, 1.20 mmol, 5.0 eq) in CH<sub>2</sub>Cl<sub>2</sub> (2.4 mL) was added dihydropyran (105.6 μL, 1.81 mmol, 7.5 eq). After stirring at rt for 24 h, the reaction mixture was diluted with EtOAc and quenched with saturated NaHCO<sub>3</sub> solution. The aqueous layer was then extracted with EtOAc. The combined organic layers were washed with brine, dried over Na<sub>2</sub>SO<sub>4</sub>, and concentrated *in vacuo*. Purification on silica gel column chromatography (hexane/EtOAc = 10:1) afforded **13** as a colorless oil (80.7 mg, 0.210 mmol, 87%); *R*<sub>f</sub> 0.67 (hexane/EtOAc = 4:1).

This compound could not be identified with <sup>1</sup>H NMR spectrum because it contains inseparable diastereomer derived from THP group.

**(2*R*, 3*R*, 5*R*)-2-Chloro-3-(1-ethoxy-ethoxy)-2-(1-ethoxy-ethoxymethyl)-5-isopropenyl-cyclohexanone (14):**

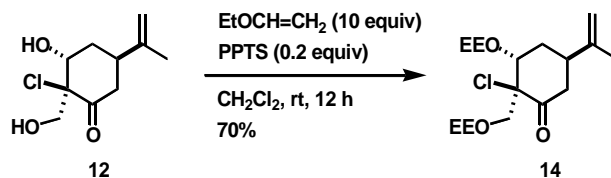

A solution of **12** (56.9 mg, 0.260 mmol, 1.0 eq) and ethyl vinyl ether (250.2  $\mu$ L, 2.601 mmol, 10.0 eq) in CH<sub>2</sub>Cl<sub>2</sub> (3 mL) was stirred with PPTS (13.1 mg, 0.052 mmol, 0.2 eq) at rt for 12 h. The solution was diluted with ether and quenched with saturated NaHCO<sub>3</sub> solution. The aqueous layer was then extracted with CH<sub>2</sub>Cl<sub>2</sub>. The combined organic layers were washed with brine, dried over Na<sub>2</sub>SO<sub>4</sub>, and concentrated *in vacuo*. Purification on silica gel column chromatography (hexane/EtOAc = 10:1) afforded **14** as a yellow oil (66.2 mg, 0.182 mmol, 70%); *R*<sub>f</sub> 0.77 (hexane/EtOAc = 4:1).

This compound could not be identified with <sup>1</sup>H NMR spectrum because it contains inseparable diastereomer derived from EE group.

**(2R, 3R, 5R)-2-Chloro-3-hydroxy-2-(1-ethoxy-ethoxymethyl)-5-isopropenyl-cyclohexanone (12')**:

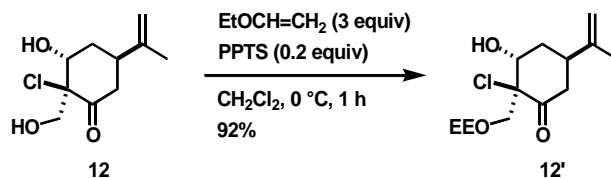

A solution of **12** (2.8615 g, 0.01308 mol, 1.0 equiv) and ethyl vinyl ether (3.78 mL, 39.24 mmol, 3.0 equiv) in  $\text{CH}_2\text{Cl}_2$  (137 mL) was stirred with PPTS (657.7 mg, 2.617 mmol, 0.2 equiv) at 0 °C for 1 h. The solution was diluted with  $\text{CH}_2\text{Cl}_2$  and quenched with saturated  $\text{NaHCO}_3$  solution. The aqueous layer was then extracted with  $\text{CH}_2\text{Cl}_2$ . The combined organic layers were washed with brine, dried over  $\text{Na}_2\text{SO}_4$ , and concentrated *in vacuo*. Purification on silica gel column chromatography (hexane/EtOAc = 4:1) afforded **12'** as a yellow oil (3.50 g, 12.04 mmol, 92%);  $R_f$  0.37 (hexane/EtOAc = 4:1);  $[\alpha]_D^{25} +74.1$  ( $c$  0.1,  $\text{CH}_2\text{Cl}_2$ );  $^{13}\text{C}$  NMR (100 MHz,  $\text{CDCl}_3$ )  $\delta$  204.9, 146.6, 110.4, 101.3, 72.2, 68.4, 67.9, 63.0, 41.6, 39.1, 32.0, 20.4, 20.0, 15.1; ESI-HRMS ( $m/z$ ) calcd for  $\text{C}_{14}\text{H}_{23}\text{ClNaO}_4$   $[\text{M}+\text{Na}]$  313.1183, found 313.1214.

This compound could not be identified with  $^1\text{H}$  NMR spectrum because it contains inseparable diastereomer derived from EE group.

**(2*R*, 3*R*, 5*R*)-2-Chloro-2-(1-ethoxy-ethoxymethyl)-5-isopropenyl-3-methanesulfonyl-cyclohexanone (8):**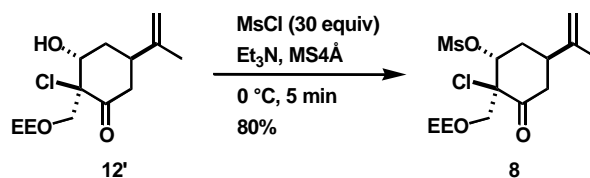

To a solution of **12'** (1.2574 g, 4.4706 mmol, 1.0 equiv) and powdered MS4Å in Et<sub>3</sub>N (100.0 mL, 0.7153 mol, 160.0 equiv) at 0 °C was added MsCl (10.4 mL, 0.1341 mol, 30.0 equiv) dropwise. After stirring for 5 min at 0 °C, the reaction mixture was diluted with CH<sub>2</sub>Cl<sub>2</sub> and quenched with saturated NaHCO<sub>3</sub> solution. After that the reaction mixture was filtered through Celite. The combined organic layers were washed with brine, dried over Na<sub>2</sub>SO<sub>4</sub>, and concentrated *in vacuo*. Purification on silica gel column chromatography (hexane/EtOAc = 4:1) afforded compound **8** as a yellow oil (1.2712 g, 3.4462 mmol, 80%); *R*<sub>f</sub> 0.30 (hexane/EtOAc = 4:1); [α]<sub>D</sub><sup>25</sup> +46.0 (*c* 0.1, MeOH); <sup>1</sup>H NMR (500 MHz, CDCl<sub>3</sub>) δ 5.21 (1H, s, H3), 4.78 (1H, s, H9), 4.73 (1H, s, H9), 4.71-4.4.67 (1H, m, EE), 4.10 (1H, d, *J* = 12.1 Hz, EE), 3.74 (1H, d, *J* = 12.1 Hz, EE), 3.65-3.59 (1H, m, EE), 3.46-3.40 (1H, m, EE), 3.05 (3H, s, Ms), 2.96 (1H, dd, *J* = 11.5, 11.5 Hz, H5), 2.79-2.73 (1H, m, H6), 2.37-2.28 (3H, m, H4,6), 1.69 (3H, s, H10), 1.26 (3H, d, *J* = 4.12 Hz, EE), 1.11 (3H, dd, *J* = 5.96, 5.96 Hz, EE); <sup>13</sup>C NMR (125 MHz, CDCl<sub>3</sub>) δ 201.7, 145.3, 111.1, 101.2, 81.1, 67.2, 65.2, 62.6, 40.9, 38.6, 38.1, 30.9, 20.3, 20.2, 15.2; ESI-HRMS (*m/z*) calcd for C<sub>15</sub>H<sub>25</sub>ClNaO<sub>6</sub>S [M+Na] 391.0958, found 391.0947.



**(1*R*, 5*R*)-4-Hydroxymethyl-1-isopropenyl-cyclopent-3-enecarboxylic acid methyl ester (15'')**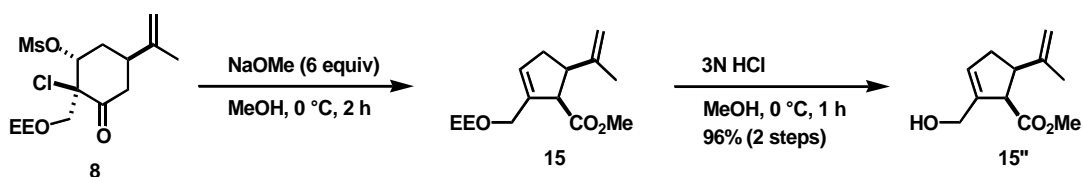

To a solution of **8** (1.1280 g, 3.0580 mmol, 1.0 equiv) in MeOH (13 mL) was added NaOMe (0.9912 g, 18.348 mmol, 6.0 equiv) in MeOH (15 mL  $\times$  3) using a cannula at 0 °C. After stirring for 2 h at 0 °C, the product **15** was obtained as a colorless oil (0.7878 g, 2.916 mmol) in 96% yield. The product was used for the second step without further purification.

To a solution of **15** in MeOH, 3N HCl (6 mL) was added. After stirring for 1 h at 0 °C the reaction mixture was diluted with MeOH and quenched with saturated NaHCO<sub>3</sub> solution. The aqueous layer was then extracted with EtOAc. The combined organic layers were washed with brine, dried over Na<sub>2</sub>SO<sub>4</sub>, and concentrated *in vacuo*. Purification on silica gel column chromatography (hexane/EtOAc = 4:1) afforded **15''** as a colorless oil (0.576 g, 2.9616 mmol, quant); *R*<sub>f</sub> 0.62 (hexane/EtOAc = 1:1); [ $\alpha$ ]<sub>D</sub><sup>25</sup> +205.9 (*c* 0.1, MeOH); <sup>1</sup>H NMR (400 MHz, CDCl<sub>3</sub>)  $\delta$  5.93 (1H, s, H3), 4.84 (1H, s, H14), 4.79 (1H, s, H14), 4.17 (2H, m, H15), 3.68 (1H, d, *J* = 8.0 Hz, H5), 3.61 (3H, s, Me), 3.18 (1H, q, *J* = 8.5 Hz, H1), 2.68-2.62 (1H, m, H2), 2.41-2.36 (1H, m, H2), 1.77 (3H, s, H10); <sup>13</sup>C NMR (100 MHz, CDCl<sub>3</sub>)  $\delta$  174.0, 144.8, 141.8, 131.3, 111.9, 61.7, 54.7, 51.9, 50.6, 35.2, 22.9; ESI-HRMS (*m/z*) calcd for C<sub>11</sub>H<sub>16</sub>O<sub>3</sub><sup>+</sup> [M]<sup>+</sup> 196.1099, found 196.1080.

**(1*R*, 5*R*)-4-Bromomethyl-1-isopropenyl-cyclopent-3-enecarboxylic acid methyl ester (7):**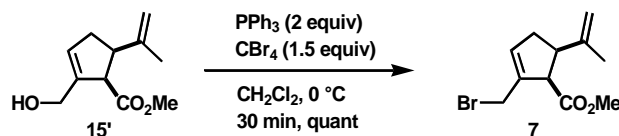

To a solution of **15'** (2.6633 g, 13.571 mmol, 1.0 equiv) and  $\text{PPh}_3$  (7.1194 g, 27.143 mmol, 2.0 equiv) in  $\text{CH}_2\text{Cl}_2$  (144.0 mL) was added  $\text{CBr}_4$  (6.7511 g, 20.357 mmol, 1.5 equiv) at 0 °C. After stirring for 30 minutes at 0 °C, the reaction mixture was treated with hexane/EtOAc = 4:1 mixture and passed through short silica gel column chromatography (hexane/EtOAc = 4/1) and concentrated *in vacuo*. Purification on silica gel column chromatography (hexane/EtOAc = 9:1) afforded **7** (35273 g, 13.571 mmol, quant) as a colorless oil;  $R_f$  0.90 (hexane/EtOAc = 1:1);  $[\alpha]_D^{25} +62.2$  ( $c$  0.1, MeOH);  $^1\text{H NMR}$  (400 MHz,  $\text{CDCl}_3$ )  $\delta$  6.08 (1H, s, H3), 4.86 (1H, s, H14), 4.74 (1H, s, H14), 4.13 (1H, d,  $J = 10.7$  Hz, H15), 4.02 (1H, d,  $J = 10.7$  Hz, H15), 3.81 (1H, d,  $J = 8.7$  Hz, H5), 3.62 (3H, s, Me), 3.21 (1H, dd,  $J = 17.1, 8.7$  Hz, H1), 2.73-2.64 (1H, m, H2), 2.46-2.38 (1H, m, H2), 1.77 (3H, s, H9);  $^{13}\text{C NMR}$  (100 MHz,  $\text{CDCl}_3$ )  $\delta$  172.4, 144.1, 138.2, 134.7, 111.7, 54.2, 51.5, 50.3, 35.1, 30.2, 22.4; ESI-HRMS ( $m/z$ ) calcd for  $\text{C}_{11}\text{H}_{14}\text{BrO}_2^+$   $[\text{M}-\text{H}]^+$  257.0177, found 257.0164, 259.0125.

**(1R, 3R, 5R)-3-Hydroxy-1-isopropenyl-4-methylene-cyclopentanecarboxylic acid methyl ester (18):**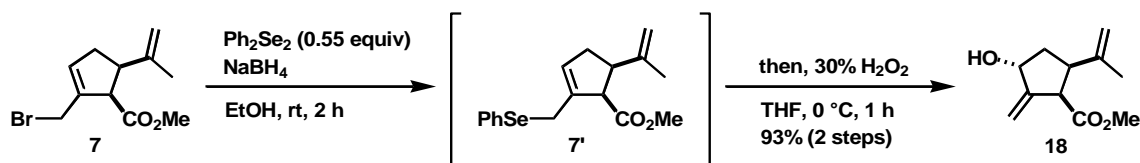

To a solution of diphenyl diselenide (4.3462 g, 13.925 mmol, 0.55 equiv) in EtOH (90.0 mL) was added enough sodium borohydride to render the yellow solution colorless. To this solution was added **7** (6.5608 g, 25.318 mmol, 1.0 equiv) in EtOH (30.0 mL × 4) using a cannula at 0 °C. The solution was stirred for 15 minutes at 0 °C, 2 h at room temperature and 1/2 of the EtOH was evaporated under a stream of N<sub>2</sub> gas. The reaction mixture was added THF (126.0 mL), followed by 30% H<sub>2</sub>O<sub>2</sub> solution (14.54 mL, 1.74 M) at 0 °C. After stirring at 0 °C for 10 minutes, the reaction mixture was diluted with ether, quenched with saturated NaHCO<sub>3</sub> solution. The aqueous layer was then extracted with ether. The combined organic layers were washed with brine, dried over Na<sub>2</sub>SO<sub>4</sub>, and concentrated *in vacuo*. Purification on silica gel column chromatography (hexane/EtOAc = 4:1) afforded **18** as a colorless oil (4.452 g, 23.546 mmol, 93%); *R<sub>f</sub>* 0.77 (hexane/EtOAc = 1:1); [α]<sub>D</sub><sup>25</sup> -50.6 (*c* 0.2, MeOH); <sup>1</sup>H NMR (400 MHz, CDCl<sub>3</sub>) δ 5.40 (1H, t, *J* = 1.5 Hz, H15), 5.27 (1H, t, *J* = 1.2 Hz, H15), 4.83 (1H, s, H14), 4.72 (2H, m, H3/14), 3.79 (1H, d, *J* = 7.8 Hz, H5), 3.59 (3H, s, Me), 3.18-3.09 (1H, m, H1), 2.45-2.34 (1H, m, H2), 1.86-1.79 (4H, m, H2/9); <sup>13</sup>C NMR (100 MHz, CDCl<sub>3</sub>) δ 172.9, 153.6, 143.9, 113.6, 110.9, 73.8, 52.7, 51.6, 47.2, 37.7, 23.1; ESI-HRMS (*m/z*) calcd for C<sub>11</sub>H<sub>16</sub>O<sub>3</sub><sup>+</sup> [M]<sup>+</sup> 196.1099, found 196.1097.

**(1*R*, 5*R*)-1-Isopropenyl-4-methylene-3-oxo-cyclopentanecarboxylic acid methyl ester (19):**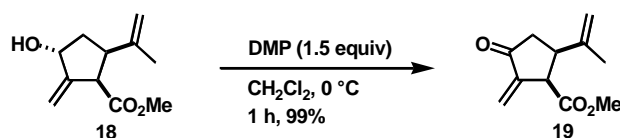

To a solution of **18** (1.8792 g, 9.5760 mmol, 1.0 equiv) in  $\text{CH}_2\text{Cl}_2$  (94.3 mL) to cooled at 0 °C was added Dess-Martin periodinane (6.0923 g, 14.364 mmol, 1.5 equiv). After stirring for 1 h at 0 °C, the reaction mixture was diluted with  $\text{CH}_2\text{Cl}_2$  and quenched with saturated  $\text{Na}_2\text{SO}_3$  solution and saturated  $\text{NaHCO}_3$  solution (1/1). The aqueous layer was then extracted with  $\text{CH}_2\text{Cl}_2$ . The combined organic layers were washed with brine, dried over  $\text{Na}_2\text{SO}_4$ , and concentrated *in vacuo*. Purification on silica gel column chromatography (hexane/EtOAc = 4:1) afforded **19** as a colorless oil (1.8449 g, 9.5188 mmol, 99%);  $R_f$  0.83 (hexane/EtOAc = 1:1);  $[\alpha]_D^{25}$  -118.5 (*c* 0.1, MeOH);  $^1\text{H NMR}$  (400 MHz,  $\text{CDCl}_3$ )  $\delta$  6.16 (1H, d,  $J$  = 1.8 Hz, H15), 5.51 (1H, d,  $J$  = 1.5 Hz, H15), 4.92-4.91 (1H, m, H14), 4.77 (1H, s, H14), 4.00-3.97 (1H, m, H5), 3.63 (3H, s, Me), 3.05-2.96 (1H, m, H1), 2.85 (1H, dd,  $J$  = 17.7, 11.7 Hz, H2), 2.42 (1H, dd,  $J$  = 17.1, 6.9 Hz, H2), 1.80 (3H, s, H9);  $^{13}\text{C NMR}$  (100 MHz,  $\text{CDCl}_3$ )  $\delta$  203.8, 171.5, 143.5, 142.7, 120.0, 111.9, 51.8, 50.6, 43.7, 40.3, 21.8; ESI-HRMS ( $m/z$ ) calcd for  $\text{C}_{11}\text{H}_{14}\text{O}_3^+$   $[\text{M}]^+$  194.0943, found 194.0942.

**(1R, 3S, 5R)-3-Hydroxy-1-isopropenyl-4-methylene-cyclopentanecarboxylic acid methyl ester (19')**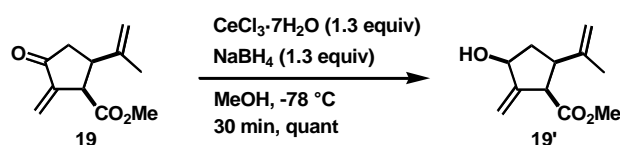

Solid  $\text{CeCl}_3 \cdot 7\text{H}_2\text{O}$  (3.9585 g, 10.624 mmol, 1.3 equiv) was added in one portion to a solution of **19** (1.5874 g, 8.1727 mmol, 1.0 equiv) in MeOH (77.4 mL) at -78 °C. After stirring for 10 minutes at -78 °C,  $\text{NaBH}_4$  (0.4019 g, 10.624 mmol, 1.3 equiv) was added in one portion. The reaction mixture was stirred at -78 °C for 30 minutes and then warmed to 0 °C. After stirring for 10 minutes at 0 °C, the reaction mixture was diluted with  $\text{CH}_2\text{Cl}_2$  and quenched with saturated  $\text{NH}_4\text{Cl}$  solution. The aqueous layer was then extracted with  $\text{CH}_2\text{Cl}_2$ . The combined organic layers were washed with brine, dried over  $\text{Na}_2\text{SO}_4$ , and concentrated *in vacuo*. Purification on silica gel column chromatography (hexane/EtOAc = 4:1) afforded **19'** as a yellow oil (1.4717 g, 7.4998 mmol, quant);  $R_f$  0.67 (hexane/EtOAc = 1:1);  $[\alpha]_{\text{D}}^{25} +146.4$  (*c* 0.1, MeOH);  $^1\text{H}$  NMR (500 MHz,  $\text{CDCl}_3$ )  $\delta$  5.39 (1H, t,  $J$  = 1.8 Hz, H15), 5.23 (1H, t,  $J$  = 1.8 Hz, H15), 4.86-4.85 (1H, m, H14), 4.76 (1H, s, H14), 4.54-4.49 (1H, m, H3), 3.66-3.62 (4H, m, H5/Me), 2.65-2.56 (1H, m, H1), 2.35-2.26 (1H, m, H2), 2.17-2.02 (1H, m, H2), 1.78 (3H, s, H9);  $^{13}\text{C}$  NMR (100 MHz,  $\text{CDCl}_3$ )  $\delta$  173.7, 152.3, 143.2, 112.6, 111.0, 73.8, 52.3, 51.7, 45.8, 37.6, 22.7; ESI-HRMS ( $m/z$ ) calcd for  $\text{C}_{11}\text{H}_{16}\text{O}_3^+$   $[\text{M}]^+$  196.1099, found 196.1097.

**(1R, 3S, 5R)-3-(*p*-Methoxy-benzyloxy)-1-isopropenyl-4-methylene-cyclopentanecarboxylic acid methyl ester (20):**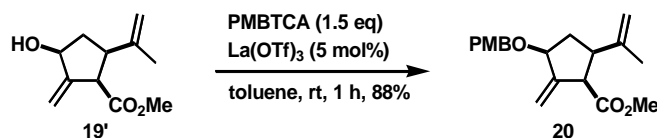

A solution of **19'** (2.2996 g, 11.72 mmol, 1.0 equiv) and *p*-methoxybenzyl trichloroacetimidate (3.649 mL, 17.58 mmol, 1.5 equiv) in toluene (276 mL) was treated with La(OTf)<sub>3</sub> (343.4 mg, 0.1611 mmol, 5 mol%) at room temperature. After stirring for 1 h at room temperature, the reaction mixture was concentrated *in vacuo*. Purification on silica gel column chromatography (hexane/EtOAc = 10:1) afforded **20** as a colorless oil (3.280 g, 10.37 mmol, 88%); *R*<sub>f</sub> 0.57 (hexane/EtOAc = 4:1); [α]<sub>D</sub><sup>20</sup> +80.1 (*c* 0.76, CHCl<sub>3</sub>); <sup>1</sup>H NMR (400 MHz, CDCl<sub>3</sub>) δ 7.26-7.19 (2H, m, Bn), 6.83-6.79 (2H, m, Bn), 5.29 (1H, t, *J* = 1.8 Hz, H15), 5.16 (1H, t, *J* = 2.4 Hz, H15), 4.77 (1H, q, *J* = 1.8 Hz, H14), 4.69 (1H, s, H14), 4.59 (1H, d, *J* = 11.7 Hz, CH<sub>2</sub>), 4.44 (1H, *J* = 11.7 Hz, CH<sub>2</sub>), 4.32-4.26 (1H, m, H3), 3.82 (3H, s, Me), 3.65 (1H, d, *J* = 7.8 Hz, H5), 3.62 (3H, s, Me), 2.51-2.44 (1H, m, H1), 2.23-2.02 (2H, m, H2), 1.78 (3H, s, H9); <sup>13</sup>C NMR (75 MHz, CDCl<sub>3</sub>) δ 172.8, 159.3, 149.3, 143.5, 130.8, 129.5, 113.9, 112.1, 111.1, 79.4, 70.5, 55.4, 51.7, 51.5, 44.7, 33.6, 22.7; ESI-HRMS (*m/z*) calcd for C<sub>19</sub>H<sub>24</sub>O<sub>4</sub><sup>+</sup> [M]<sup>+</sup> 316.1675, found 316.1670.

**(1*R*, 3*S*, 5*R*)-5-(Hydroxymethyl)-1-isopropenyl-3-(*p*-methoxy-benzyloxy)-4-methylene-cyclopentanecarboxylic acid methyl ester (20')**

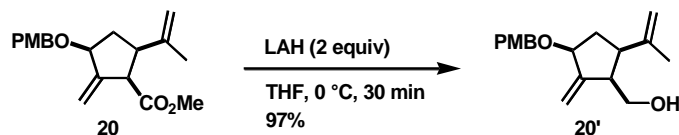

To a solution of lithium aluminium hydride (196.7 mg, 5.1841 mmol, 2.0 equiv) in THF (10 mL) was added dropwise **20** (820.1 mg, 2.5920 mmol, 1.0 equiv) in THF (10 mL × 3) using a cannula at 0 °C. After stirring for 30 min at 0 °C, the reaction mixture was diluted with ether, quenched with 10% KOH aqueous solution and filtered with Celite. The aqueous layer was then extracted with ether. The combined organic layers were washed with brine, dried over Na<sub>2</sub>SO<sub>4</sub>, and concentrated *in vacuo*. Purification on silica gel column chromatography (hexane/EtOAc = 4:1) afforded **20'** as a colorless oil (722.2 mg, 2.5044 mmol, 97%); *R*<sub>f</sub> 0.43 (hexane/EtOAc = 4:1); [α]<sub>D</sub><sup>25</sup> +135.9 (*c* 0.1, MeOH); <sup>1</sup>H NMR (500 MHz, CDCl<sub>3</sub>) δ 7.30-7.26 (2H, m, Bn), 6.91-6.86 (2H, m, Bn), 5.31 (1H, s, H15), 5.22 (1H, s, H15), 4.91 (1H, s, H14), 4.82 (1H, s, H14), 4.57 (1H, d, *J* = 11.4 Hz, CH<sub>2</sub>), 4.50 (1H, d, *J* = 11.4 Hz, CH<sub>2</sub>), 4.31-4.25 (1H, m, H3), 3.60 (1H, dd, *J* = 11.7, 6.3 Hz, H6), 3.41 (1H, dd, *J* = 11.7, 7.2 Hz, H6), 2.81-2.76 (1H, m, H5), 2.52-2.46 (1H, m, H1), 2.20-2.12 (1H, m, H2), 1.93-1.82 (4H, m, H2/9); <sup>13</sup>C NMR (100 MHz, CDCl<sub>3</sub>) δ 159.3, 152.2, 144.4, 130.5, 129.4, 113.9, 112.0, 110.9, 79.6, 70.8, 62.6, 55.3, 47.5, 44.6, 34.0, 23.2; ESI-HRMS (*m/z*) calcd for C<sub>18</sub>H<sub>24</sub>O<sub>3</sub><sup>+</sup> [M]<sup>+</sup> 288.1725, found 288.1721.

**7-{Hydroxy-[1-isopropenyl-3-(*p*-methoxy-benzyloxy)-4-methylene-cyclopentyl]-methyl}-11-methylene-dihydro-furan-12-one (4):**

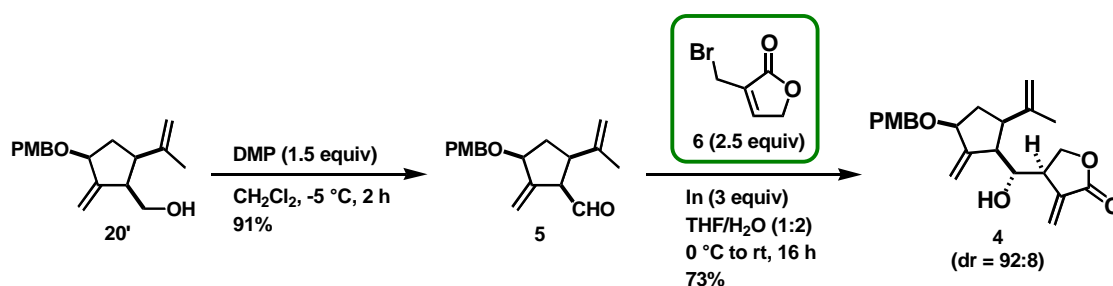

To a solution of **20'** (65.5 mg, 0.2273 mmol, 1.0 equiv) in  $\text{CH}_2\text{Cl}_2$  (2.8 mL) cooled at  $0\text{ }^\circ\text{C}$  was added Dess-Martin periodinane (152.0 mg, 0.3409 mmol, 1.5 equiv). After stirring for 2 h at  $-5\text{ }^\circ\text{C}$ , the reaction mixture was diluted with  $\text{CH}_2\text{Cl}_2$  and quenched with saturated  $\text{Na}_2\text{SO}_3$  and  $\text{NaHCO}_3$  solution (1/1). The aqueous layer was then extracted with  $\text{CH}_2\text{Cl}_2$ . The combined organic layers were washed with brine, dried over  $\text{Na}_2\text{SO}_4$ , and concentrated *in vacuo* afforded **5** as a colorless oil (59.2 mg, 0.2068 mmol, 91%), and the residue was used for the second step without further purification; **5**:  $R_f$  0.70 (hexane/EtOAc = 2:1).

Next, the residue **5** and bromolactone **6** (92.4 mg, 0.5682 mmol, 2.5 equiv) in  $\text{THF}/\text{H}_2\text{O}$  (1:2) (0.3 mL) was treated with In powder (72.1 mg, 0.6818 mmol, 3.0 equiv) at  $0\text{ }^\circ\text{C}$ . After stirring for 16 h at  $0\text{ }^\circ\text{C}$  to room temperature, the reaction mixture was filtered through Celite and combined. The aqueous layer was then extracted with  $\text{Et}_2\text{O}$ . The combined organic layers were washed with brine, dried over  $\text{Na}_2\text{SO}_4$ , and concentrated *in vacuo*. Purification on silica gel column chromatography (hexane/EtOAc = 5:1) afforded **4** as a yellow oil (63.8 mg, 0.1659 mmol, 73% (2 steps) (dr = 92:8));  $R_f$  0.37 (hexane/EtOAc = 2:1);  $[\alpha]_D^{25}$   $-36.0$  ( $c$  0.032,  $\text{CHCl}_3$ );  $^1\text{H}$  NMR (500 MHz,  $\text{CDCl}_3$ )  $\delta$  7.27-7.22 (2H, m, Bn), 6.90-6.67 (2H, m, Bn), 6.32 (1H, dd,  $J$  = 2.7, 0.9 Hz, H13), 5.98 (1H, dd,  $J$  = 2.4, 1.2 Hz, H13), 5.40 (1H, s, H15), 5.23 (1H, s, H15), 5.03 (1H, s, H14), 4.94 (1H, s, H14), 4.52-4.38 (3H, m, H8/ $\text{CH}_2$ ), 4.33-4.20 (1H, m, H3), 4.01-3.97 (1H, m, H6), 3.80 (3H, s, Me), 3.53 (1H, d,  $J$  = 9.3 Hz, H8), 3.20-3.12 (1H, m, H7), 2.99-2.91 (1H, m, H5), 2.62-2.21 (2H, m, H1/2), 2.28-2.21 (1H, m, H2), 1.78 (3H, s, H9);  $^{13}\text{C}$  NMR



*Electronic Supplementary Information*

(125 MHz, CDCl<sub>3</sub>)  $\delta$  171.0, 159.6, 149.1, 142.1, 135.1, 129.8, 129.3, 126.0, 117.2, 114.1, 112.8, 80.1, 71.6, 70.0, 67.8, 55.4, 49.5, 47.3, 43.2, 35.2, 23.6; ESI-HRMS ( $m/z$ ) calcd for C<sub>23</sub>H<sub>28</sub>O<sub>5</sub><sup>+</sup> [M]<sup>+</sup> 384.1937, found 384.1950.

**7-Hydroxymethyl-6-[1-isopropenyl-3-(*p*-methoxy-benzyloxy)-4-methylene-cyclopentyl]-11-methoxymethyl-dihydro-furan-12-one (**21**):**

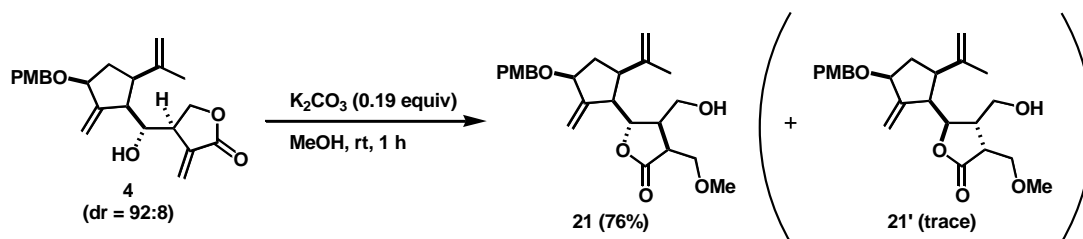

To a solution of **4** (24.7 mg, 0.0642 mmol, 1.0 equiv) in MeOH (1.0 mL) was added  $K_2CO_3$  (1.7 mg, 0.0122 mmol, 0.19 equiv) at room temperature. After stirring for 1 h, the reaction mixture was diluted with  $CH_2Cl_2$  and quenched with saturated  $NH_4Cl$  solution. The aqueous layer was then extracted with  $CH_2Cl_2$ . The combined organic layers were washed with brine, dried over  $Na_2SO_4$ , and concentrated *in vacuo*. Purification on silica gel column chromatography (hexane/EtOAc = 2:1) afforded **21** as a colorless oil (20.6 mg, 0.0488 mmol, 76%);  $R_f$  0.27 (hexane/EtOAc = 1:1);  $[\alpha]_D^{25} +29.9$  (*c* 0.1, MeOH);  $^1H$  NMR (500 MHz,  $CDCl_3$ )  $\delta$  7.31-7.29 (2H, m, Bn), 6.88-6.86 (2H, m, Bn), 5.42 (1H, s, H15), 5.29 (1H, s, H15), 4.98 (1H, s, H14), 4.92 (1H, s, H14), 4.57 (1H, d,  $J = 6.6$  Hz,  $CH_2$ ), 4.46 (1H, d,  $J = 6.6$  Hz,  $CH_2$ ), 4.33-4.30 (1H, m, H3), 4.11-4.09 (1H, m, H6), 3.85 (1H, dd,  $J = 6.0, 2.1$  Hz, H13), 3.80 (3H, s, Me), 3.74 (1H, dd,  $J = 6.6, 2.1$ , H8), 3.60-3.56 (1H, m, H8), 3.43-3.39 (4H, m, H13/Me), 2.83 (1H, d,  $J = 4.2$  Hz, H5), 2.69-2.65 (2H, m, H7/11), 2.56-2.51 (1H, m, H1), 2.19-2.14 (1H, m, H2), 2.09-2.04 (1H, m, H2), 1.75 (3H, s, H9);  $^{13}C$  NMR (125 MHz,  $CDCl_3$ )  $\delta$  174.3, 158.9, 149.3, 142.4, 130.8, 129.1, 114.4, 113.6, 112.9, 79.0, 78.8, 71.4, 69.7, 63.0, 59.1, 55.2, 46.9, 46.0, 46.0, 45.5, 33.2, 22.9.; ESI-HRMS ( $m/z$ ) calcd for  $C_{24}H_{32}NaO_6^+$   $[M+Na]^+$  439.2097, found 439.2128.

**8-Hydroxy-3-(*p*-methoxy-benzyloxy)-11-methoxymethyl-4,10-dimethylene-decahydro-azuleno[6,7- $\beta$ ]furan-12-one (**22'**):**

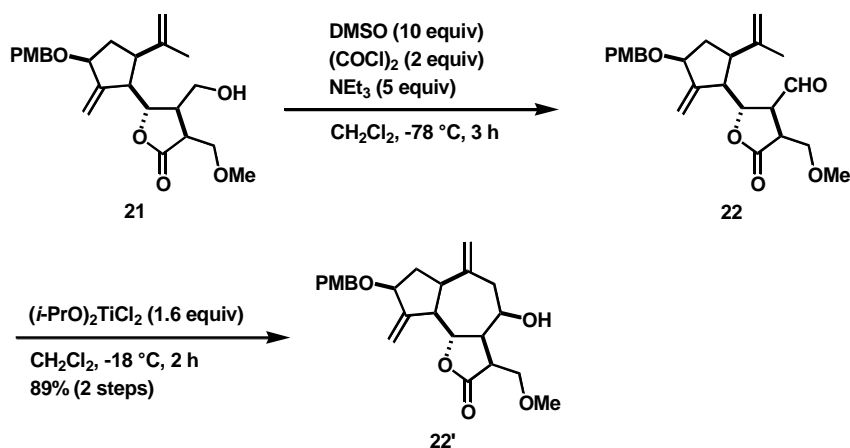

To a solution of DMSO (49.1  $\mu$ L, 0.691 mmol, 10.0 equiv) in CH<sub>2</sub>Cl<sub>2</sub> (0.29 mL) was added dropwise oxalyl chloride (11.9  $\mu$ L, 0.138 mmol, 2.0 equiv) at -78 °C. After stirring at this temperature for 30 min, a solution of **21** (28.8 mg, 0.0691 mmol, 1.0 equiv) in CH<sub>2</sub>Cl<sub>2</sub> (0.58 mL) was added dropwise at the same temperature. The reaction mixture was stirred for 3 h and then Et<sub>3</sub>N (48.3  $\mu$ L, 0.346 mmol, 5.0 equiv) was added. After stirring for 1 h at -78 °C and 15 min at room temperature, the reaction mixture was diluted with CH<sub>2</sub>Cl<sub>2</sub>. The aqueous layer was then extracted with CH<sub>2</sub>Cl<sub>2</sub>. The combined organic layers were washed with brine, dried over Na<sub>2</sub>SO<sub>4</sub>, and concentrated *in vacuo*. The crude aldehyde **22** was used in the next step without further purification.

To a solution of crude aldehyde **22** in CH<sub>2</sub>Cl<sub>2</sub> (0.66 mL) was added (*i*PrO)<sub>2</sub>TiCl<sub>2</sub> (26.2 mg, 0.1029 mmol, 1.6 equiv) at -18 °C. After stirring for 2 h at -18 °C, the reaction mixture was diluted with CH<sub>2</sub>Cl<sub>2</sub> and quenched with saturated Na<sub>2</sub>SO<sub>3</sub> solution. The aqueous layer was then extracted with CH<sub>2</sub>Cl<sub>2</sub>. The combined organic layers were washed with brine, dried over Na<sub>2</sub>SO<sub>4</sub>, and concentrated *in vacuo*. Purification on silica gel column chromatography (hexane/EtOAc = 2:1) afforded **22'** as a colorless oil (25.6 mg, 0.06176 mmol, 89% (2 steps)); *R*<sub>f</sub> 0.37

*Electronic Supplementary Information*

(hexane/EtOAc = 1:1);  $[\alpha]_{\text{D}}^{25} +32.4$  ( $c$  0.1, MeOH);  $^1\text{H}$  NMR (500 MHz,  $\text{CDCl}_3$ )  $\delta$  7.27-7.25 (2H, m, Bn), 6.88-6.86 (2H, m, Bn), 5.39 (1H, s, H15), 5.30 (1H, s, H15), 5.21 (1H, s, H14), 4.96 (1H, s, H14), 4.54 (1H, d,  $J = 6.9$  Hz,  $\text{CH}_2$ ), 4.43 (1H, d,  $J = 6.9$  Hz,  $\text{CH}_2$ ), 4.25-4.19 (1H, m, H3/6), 4.07-4.04 (1H, m, H8), 3.80 (3H, s, Me), 3.70 (2H, d,  $J = 2.4$  Hz, H13), 3.37 (3H, s, Me), 3.09-3.05 (1H, m, H11), 2.96-2.90 (1H, m, H1), 2.75 (1H, t,  $J = 5.4$  Hz, H5), 2.55-2.45 (2H, m, H9), 2.42-2.37 (1H, m, H7), 2.29-2.23 (1H, m, H2), 1.98-1.93 (1H, m, H2);  $^{13}\text{C}$  NMR (125 MHz,  $\text{CDCl}_3$ )  $\delta$  176.3, 159.5, 149.7, 143.9, 131.0, 129.7, 129.7, 117.4, 114.4, 114.2, 80.4, 78.0, 70.5, 69.5, 59.7, 55.7, 51.1, 51.0, 45.2, 43.6, 43.3, 36.9, 21.4; ESI-HRMS ( $m/z$ ) calcd for  $\text{C}_{24}\text{H}_{30}\text{NaO}_6^+$   $[\text{M}+\text{Na}]^+$  437.1940, found 437.1939.

**8-Hydroxy-3-(*p*-methoxy-benzyloxy)-13,14,15-trimethylene-decahydro-azuleno[6,7- $\beta$ ]furan-12-one (3):**

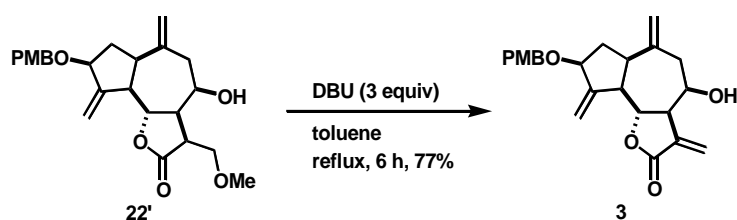

A solution of **22'** (36.5 mg, 0.0881 mmol, 1.0 equiv) and DBU (40.0  $\mu$ L, 0.2642 mmol, 3.0 equiv) in toluene (12.2 mL) was reflux for 6 h, cooled to room temperature, and concentrated *in vacuo*. Purification on silica gel column chromatography (hexane/EtOAc = 2:1) afforded **3** as a colorless oil (26.4 mg, 0.0690 mmol, 77%);  $R_f$  0.30 (hexane/EtOAc = 1:1);  $[\alpha]_D^{25} +0.77$  ( $c$  0.35,  $\text{CHCl}_3$ );  $^1\text{H NMR}$  (500 MHz,  $\text{CDCl}_3$ )  $\delta$  7.28-7.26 (2H, m, Bn), 6.88-6.87 (2H, m, Bn), 6.40 (1H, d,  $J = 2.4$  Hz, H13), 5.90 (1H, d,  $J = 1.8$  Hz, H13), 5.46 (1H, s, H15), 5.34 (1H, s, H15), 5.17 (1H, s, H14), 4.95 (1H, s, H14), 4.57-4.46 (3H, m, H6/ $\text{CH}_2$ ), 4.34-4.32 (1H, m, H8), 4.26-4.23 (1H, m, H3), 3.80 (3H, s, Me), 2.96-2.92 (2H, m, H1/5), 2.78-2.73 (1H, m, H7), 2.58 (1H, dd,  $J = 8.1, 3.6$  Hz, H9), 2.45 (1H, dd,  $J = 7.8, 3.9$  Hz, H9), 2.28-2.23 (1H, m, H2), 1.95-1.90 (1H, m, H2);  $^{13}\text{C NMR}$  (125 MHz,  $\text{CDCl}_3$ )  $\delta$  170.0, 159.5, 149.6, 143.7, 136.7, 130.9, 129.7, 129.7, 121.8, 117.8, 114.2, 114.2, 80.2, 78.3, 70.7, 66.1, 55.7, 51.5, 50.9, 45.8, 41.8, 37.2; ESI-HRMS ( $m/z$ ) calcd for  $\text{C}_{23}\text{H}_{26}\text{NaO}_5^+$   $[\text{M}+\text{Na}]^+$  405.1678, found 405.1670.

**(1*R*,3*S*,5*R*,6*R*,7*R*,8*S*)-3-(*p*-Methoxy-benzyloxy)-13,14,15-trimethylene-12-oxododecahydroazuleno[6,7- $\beta$ ]furan-8-yl-19-(triisopropylsilyloxy)acrylate (3')**

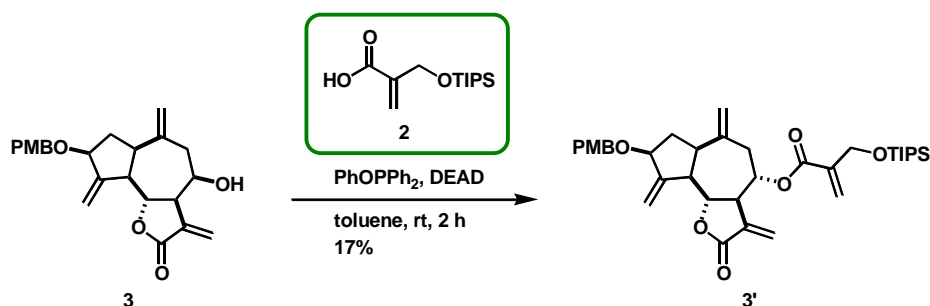

PhOPPh<sub>2</sub> (76.8 mg, 0.2761 mmol, 4.0 equiv) in toluene (605  $\mu$ L) was added to **3** (26.4 mg, 0.0690 mmol, 1.0 equiv) and **2** (71.3 mg, 0.2761 mmol, 4.0 equiv) using a cannula. The mixture was cooled to 0 °C, and then added DEAD (126  $\mu$ L, 0.2761 mmol, 4.0 equiv) 0 °C. After stirring for 2 h at room temperature, the mixture was diluted with ether, and quenched with a saturated NaHCO<sub>3</sub> solution. The aqueous layer was then extracted with ether. The combined organic layers were washed with brine, dried over Na<sub>2</sub>SO<sub>4</sub>, and concentrated *in vacuo*. Purification on silica gel column chromatography (hexane/EtOAc = 5:1) afforded **3'** as yellow oil (7.1 mg, 0.01140 mmol, 17%); *R*<sub>f</sub> 0.77 (hexane/EtOAc = 2/1); <sup>1</sup>H NMR (500 MHz, CDCl<sub>3</sub>)  $\delta$  7.25 (2H, ddd, *J* = 8.4, 1.1, 0.6 Hz, Bz), 6.87 (2H, ddd, *J* = 8.4, 1.1, 0.6 Hz, Bz), 6.34 (1H, s, H13), 6.20 (1H, d, *J* = 0.1 Hz, H19), 6.09 (1H, s, H13), 5.58 (1H, d, *J* = 0.1 Hz, H19), 5.45 (1H, s, H15), 5.31 (1H, s, H15), 5.13 (1H, s, H14), 5.10 (1H, m, H8), 4.89 (1H, s, H14), 4.54 (1H, d, *J* = 1.5 Hz, H18), 4.48 (2H, s, Bz), 4.40 (1H, d, *J* = 1.5 Hz, H18), 4.34 (1H, m, H3), 4.21 (1H, m, H6), 3.80 (3H, s, Bz), 3.15 (1H, m, H7), 3.01 (1H, m, H1), 2.78 (1H, m, H5), 2.69 (1H, m, H9), 2.36 (1H, m, H9), 2.27 (1H, m, H2), 1.82 (1H, m, H2), 1.25-1.07 (21H, m, TIPS); <sup>13</sup>C NMR (125 MHz, CDCl<sub>3</sub>)  $\delta$  169.5, 165.1, 159.3, 148.5, 142.4, 139.7, 137.9, 130.4, 129.6, 125.0, 122.5, 118.1, 115.5, 114.0, 80.2, 78.4, 77.4, 77.16, 76.9, 74.1, 70.0, 61.7, 55.4, 53.3, 47.6, 46.4, 37.2, 36.8, 29.8, 18.1, 12.1; ESI-HRMS (*m/z*) calcd for C<sub>36</sub>H<sub>50</sub>NaO<sub>7</sub>Si [M+Na] 645.3224, found 645.3216.

**Cynaropicrin (1):**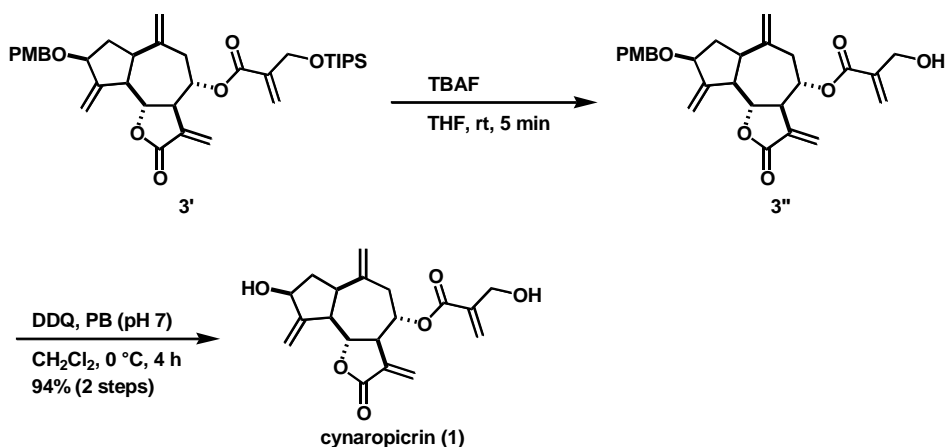

To a solution of **3'** (4.2 mg, 0.00674 mmol, 1.0 equiv) in THF (187  $\mu\text{L}$ ) cooled to 0 °C was added and TBAF (13.5  $\mu\text{L}$ , 0.01349 mmol, 2.0 equiv). After stirring for 5 min, the reaction mixture was diluted with EtOAc and quenched with saturated  $\text{NH}_4\text{Cl}$  solution. The aqueous layer was then extracted with EtOAc. The combined organic layers were washed with brine, dried over  $\text{Na}_2\text{SO}_4$ , and concentrated *in vacuo* afforded **3''** as a colorless oil, and the residue was used for the second step without further purification; **3''**:  $R_f$  0.83 (hexane/EtOAc = 1:3); ESI-HRMS ( $m/z$ ) calcd for  $\text{C}_{27}\text{H}_{30}\text{NaO}_7$  [ $\text{M}+\text{Na}$ ] 489.1889, found 489.1912.

To a solution of **3''** in  $\text{CH}_2\text{Cl}_2$  (123  $\mu\text{L}$ ) cooled to 0 °C was added PB (pH 7) (12.3  $\mu\text{L}$ ) and DDQ (3.1 mg, 0.0135 mmol, 2.0 equiv). After stirring at 0 °C for 4 h, the reaction mixture was diluted with  $\text{CH}_2\text{Cl}_2$  and quenched with saturated  $\text{Na}_2\text{SO}_3$  solution and saturated  $\text{NaHCO}_3$  solution (1/1). The aqueous layer was then extracted with  $\text{CH}_2\text{Cl}_2$ . The combined organic layers were washed with brine, dried over  $\text{Na}_2\text{SO}_4$ , and concentrated *in vacuo*. Purification on HPLC afforded cynaropicrin (**1**) as a yellow oil (2.2 mg, 0.00635 mmol, 94% (2 steps));  $R_f$  0.50 (hexane/EtOAc = 1/3);  $[\alpha]_{\text{D}}^{25} +152.2$  ( $c$  0.08, MeOH);  $^1\text{H NMR}$  (500 MHz,  $\text{CD}_3\text{Cl}_3$ )  $\delta$  6.39 (1H, s, H19), 6.23 (1H, d,  $J = 3.4$  Hz, H13), 5.96 (1H, s, H19), 5.62 (1H, d,  $J = 3.1$  Hz, H13), 5.51 (1H, s, H15), 5.37 (1H, s, H15), 5.12-5.18 (2H, m, H14/H8), 4.95 (1H, s, 14H), 4.57 (1H, t,  $J =$

*Electronic Supplementary Information*

7.2 Hz, H3), 4.39 (2H, s, H18), 4.26 (1H, dd,  $J = 10.6$  Hz, H6), 3.24-3.17 (1H, m, H7), 3.01-2.95 (1H, m, H1), 2.85 (1H, t,  $J = 10.3$  Hz, H5) 2.72 (1H, dd,  $J = 14.8$  Hz, H9), 2.41 (1H, dd,  $J = 14.4$  Hz, H9), 2.30-2.20 (1H, m, H2), 1.79-1.69 (1H, m, H2);  $^{13}\text{C}$  NMR (125 MHz,  $\text{CDCl}_3$ )  $\delta$  168.8, 165.1, 152.0, 141.5, 139.0, 137.0, 126.6, 122.6, 118.0, 113.4, 78.2, 74.1, 73.6, 62.1, 51.1, 47.4, 45.1, 38.9, 36.8; ESI-HRMS ( $m/z$ ) calcd for  $\text{C}_{19}\text{H}_{22}\text{NaO}_6$   $[\text{M}+\text{Na}]$  369.1314, found 369.1310.



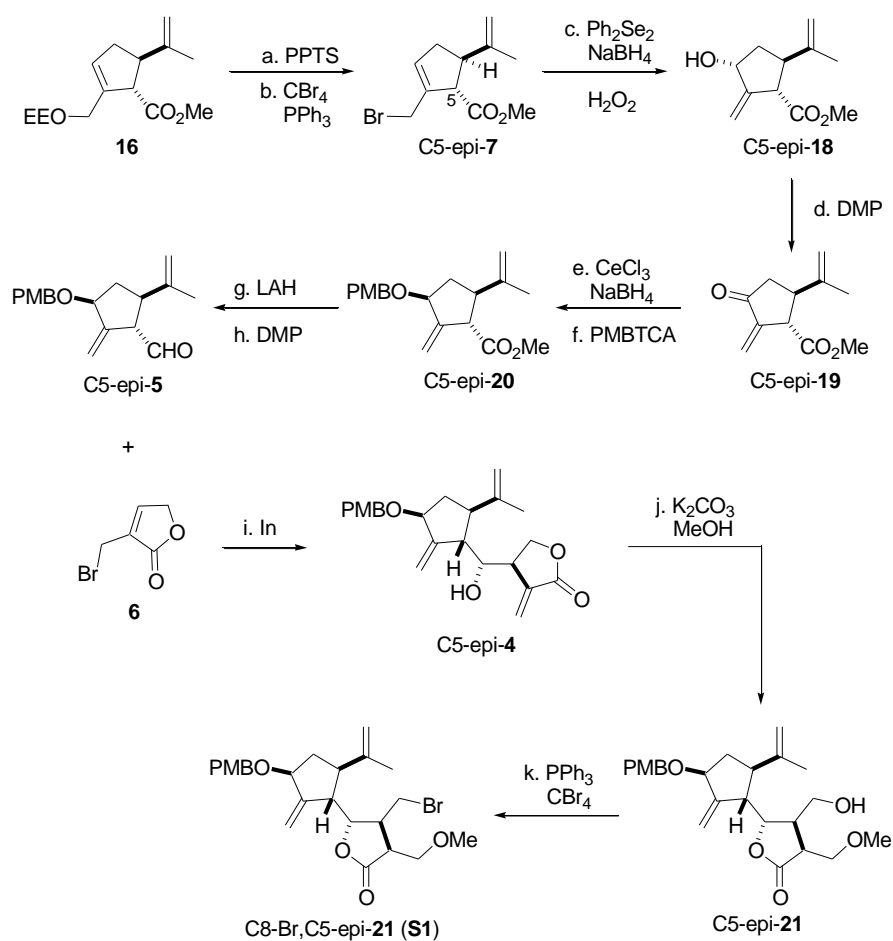

**Scheme S1.** Synthesis of C8-brominated C5-epimer of **21** (**S1**) prepared from compound **16**. Reagents and conditions: a) PPTS, MeOH, rt, 95%; b) CBr<sub>4</sub>, PPh<sub>3</sub>, CH<sub>2</sub>Cl<sub>2</sub>, 0 °C, 92%; c) Ph<sub>2</sub>Se<sub>2</sub>, NaBH<sub>4</sub>, EtOH, rt, then H<sub>2</sub>O<sub>2</sub>, THF, 0 °C, 90%; d) DMP, CH<sub>2</sub>Cl<sub>2</sub>, 0 °C, 90%; e) CeCl<sub>3</sub>·7H<sub>2</sub>O, NaBH<sub>4</sub>, CH<sub>2</sub>Cl<sub>2</sub>, 0 °C, quant; f) PMBTCA, La(OTf)<sub>3</sub>, toluene, rt, 77%; g) LAH, THF, 0 °C, 97%; h) DMP, CH<sub>2</sub>Cl<sub>2</sub>, 0 °C, 90%; i) Zn(0), THF/H<sub>2</sub>O, rt, 71%; j) K<sub>2</sub>CO<sub>3</sub>, MeOH, rt, 66%; k) PPh<sub>3</sub>, CBr<sub>4</sub>, CH<sub>2</sub>Cl<sub>2</sub>, 0 °C, 52%.

34/kinurakoakaku118

File C:\MSERS\実験\DESKTOP\実験項目\ラモイ  
 親正博の7/体名  
 Date 14/Feb/2019 20:40:53  
 Comment 34/kinurakoakaku118  
 ObsMod single\_pulse\_922  
 ObsFwq 500.16 MHz  
 ObsFset 2.41 kHz  
 ObsFline 6.0092 Hz  
 Point 13107  
 Frequency (Scan) 7507.393 Hz  
 Scan 16  
 AcqTime 1.7459 s  
 PD 4.0 s  
 Pulse 5.02 us  
 Temperature 19.1 °C  
 Solvent CDCl<sub>3</sub>  
 Reference 7.26 ppm  
 Broad.Factor 0.2864 Hz  
 RGain 42  
 Printed 2019/Feb/28 10:16:04  
 Operator

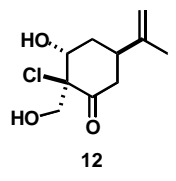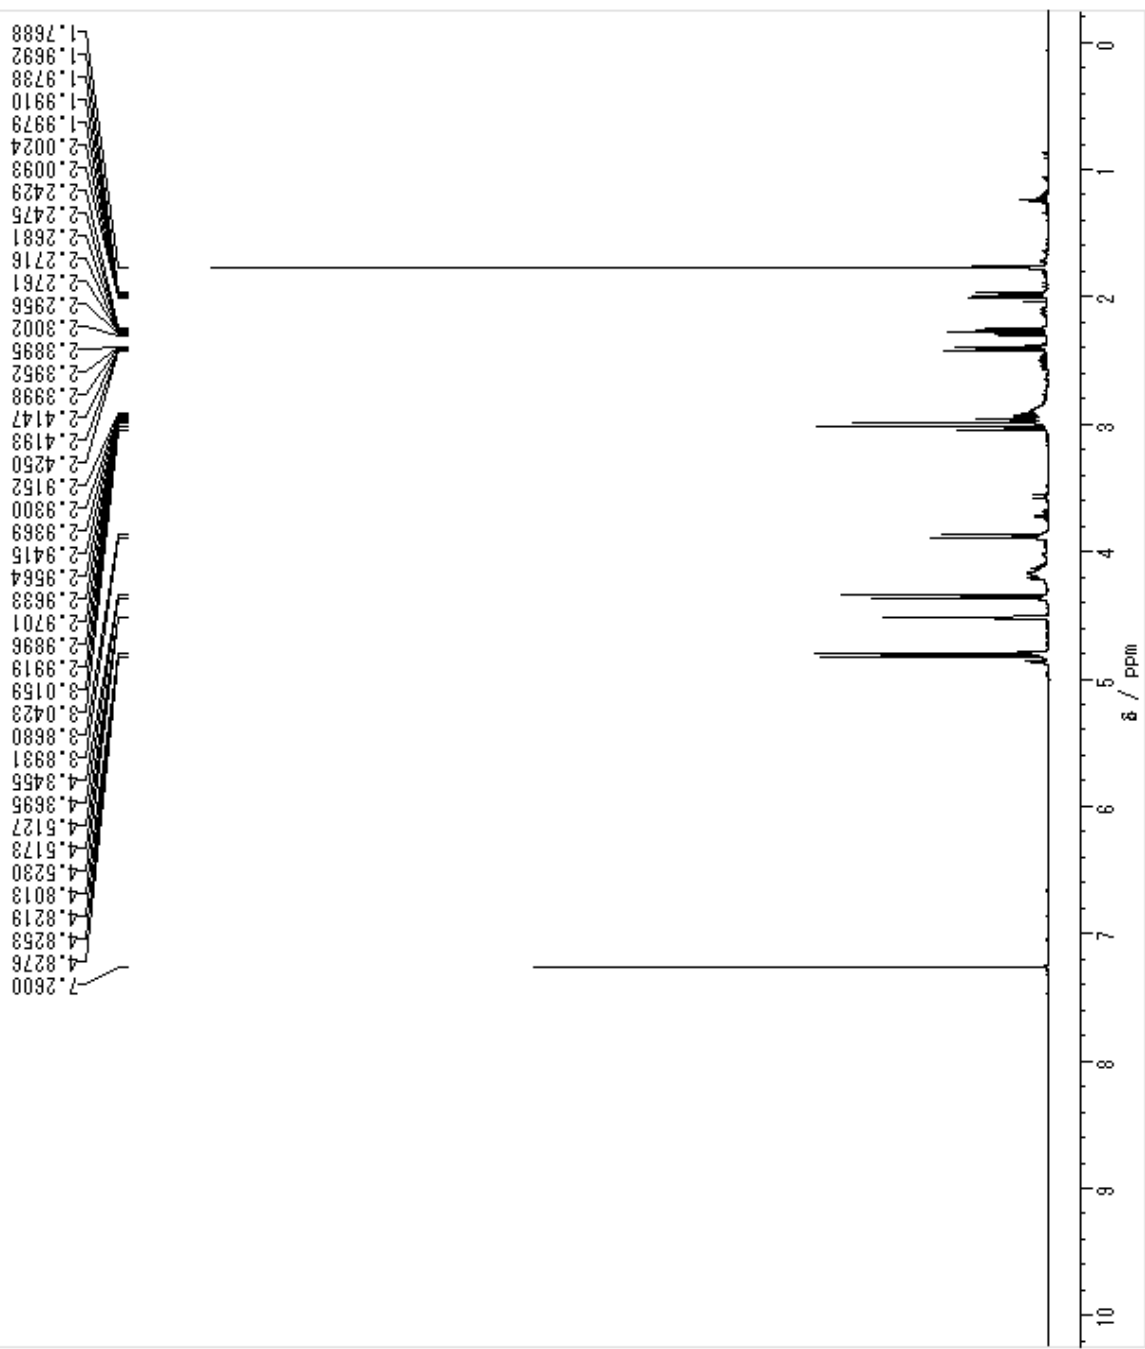

34/kinurakosaku118

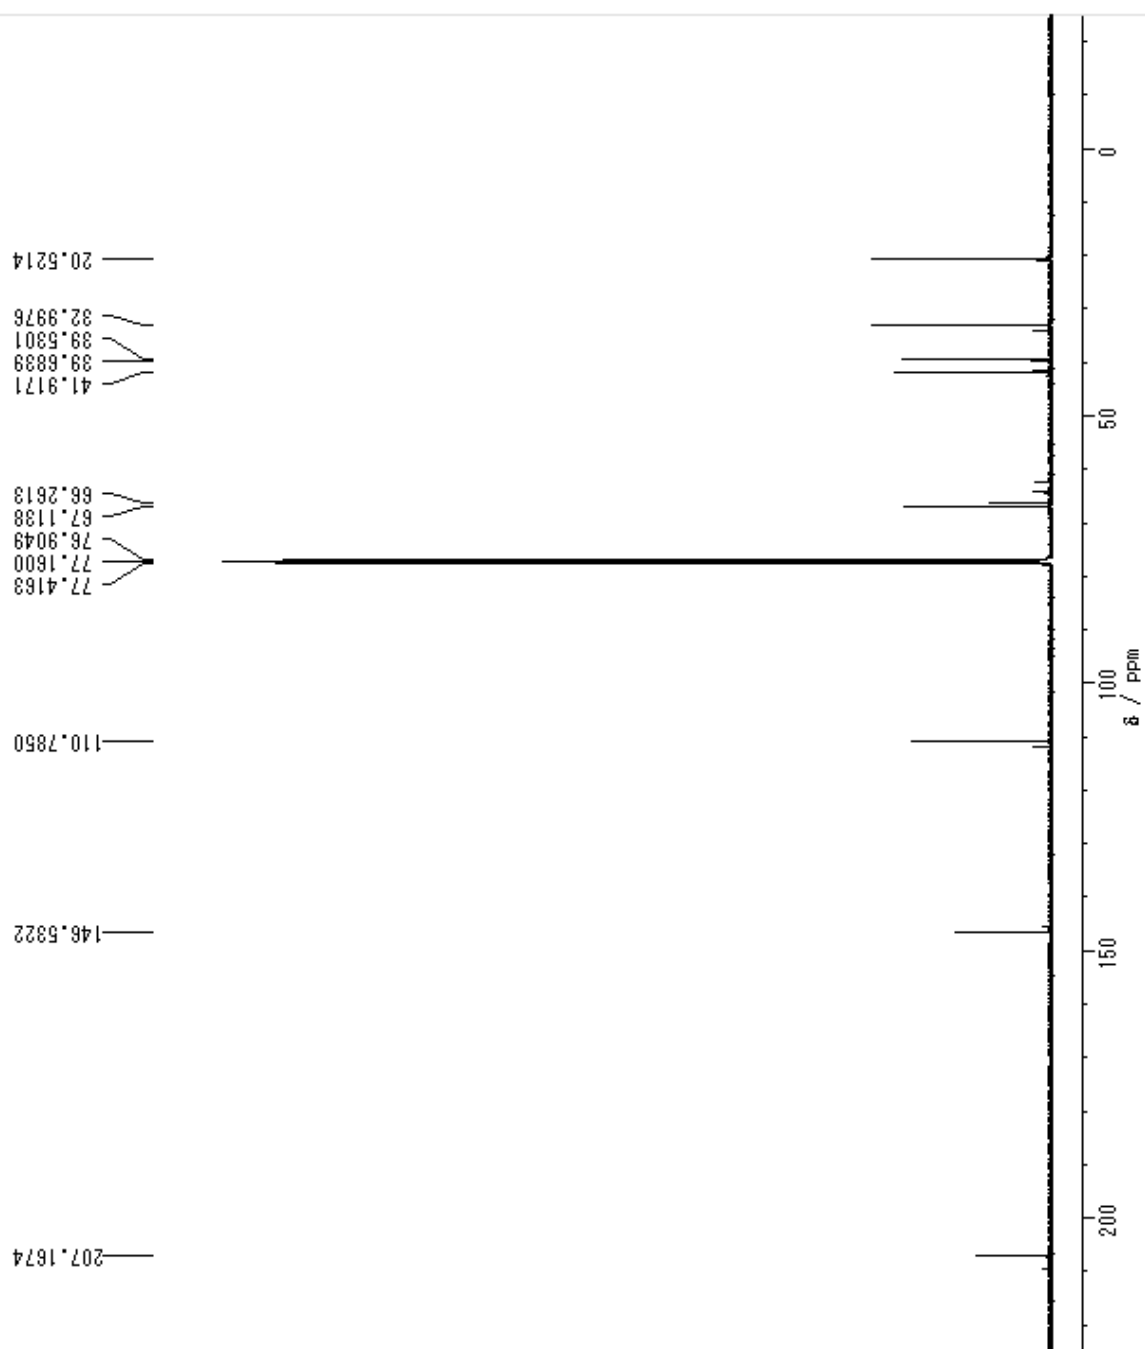

File C:\MSERS\34\KINURAKOSAKU118\DESKTOP\実験項目\34モヤ  
 1 大島 孝一 / UC: BM1  
 測定日時 2019/02/14  
 Date 14/Feb/2019 22:18:21  
 Comment  
 34/kinurakosaku118  
 Obs Nuc <sup>13</sup>C  
 Ex Mode single\_pulse\_rec  
 Obs Freq 125.77 MHz  
 Obs Res 7.87 kHz  
 Obs Set 4.2131 Hz  
 Obs Fine 26214  
 Point 31446.06 Hz  
 Frequency (Span) 2048  
 Scan 0.8336 s  
 Acq Line 2.0 s  
 PD 3.5537 α s  
 Temp 19.8 °C  
 Temp Label Temperature  
 Solvent CDCl<sub>3</sub>  
 Reference 77.16 ppm  
 Broad Factor 0.5998 Hz  
 RGain 54  
 Printed 2019/Feb/28 10:25:08  
 Operator

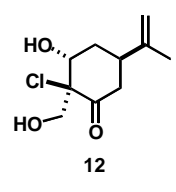

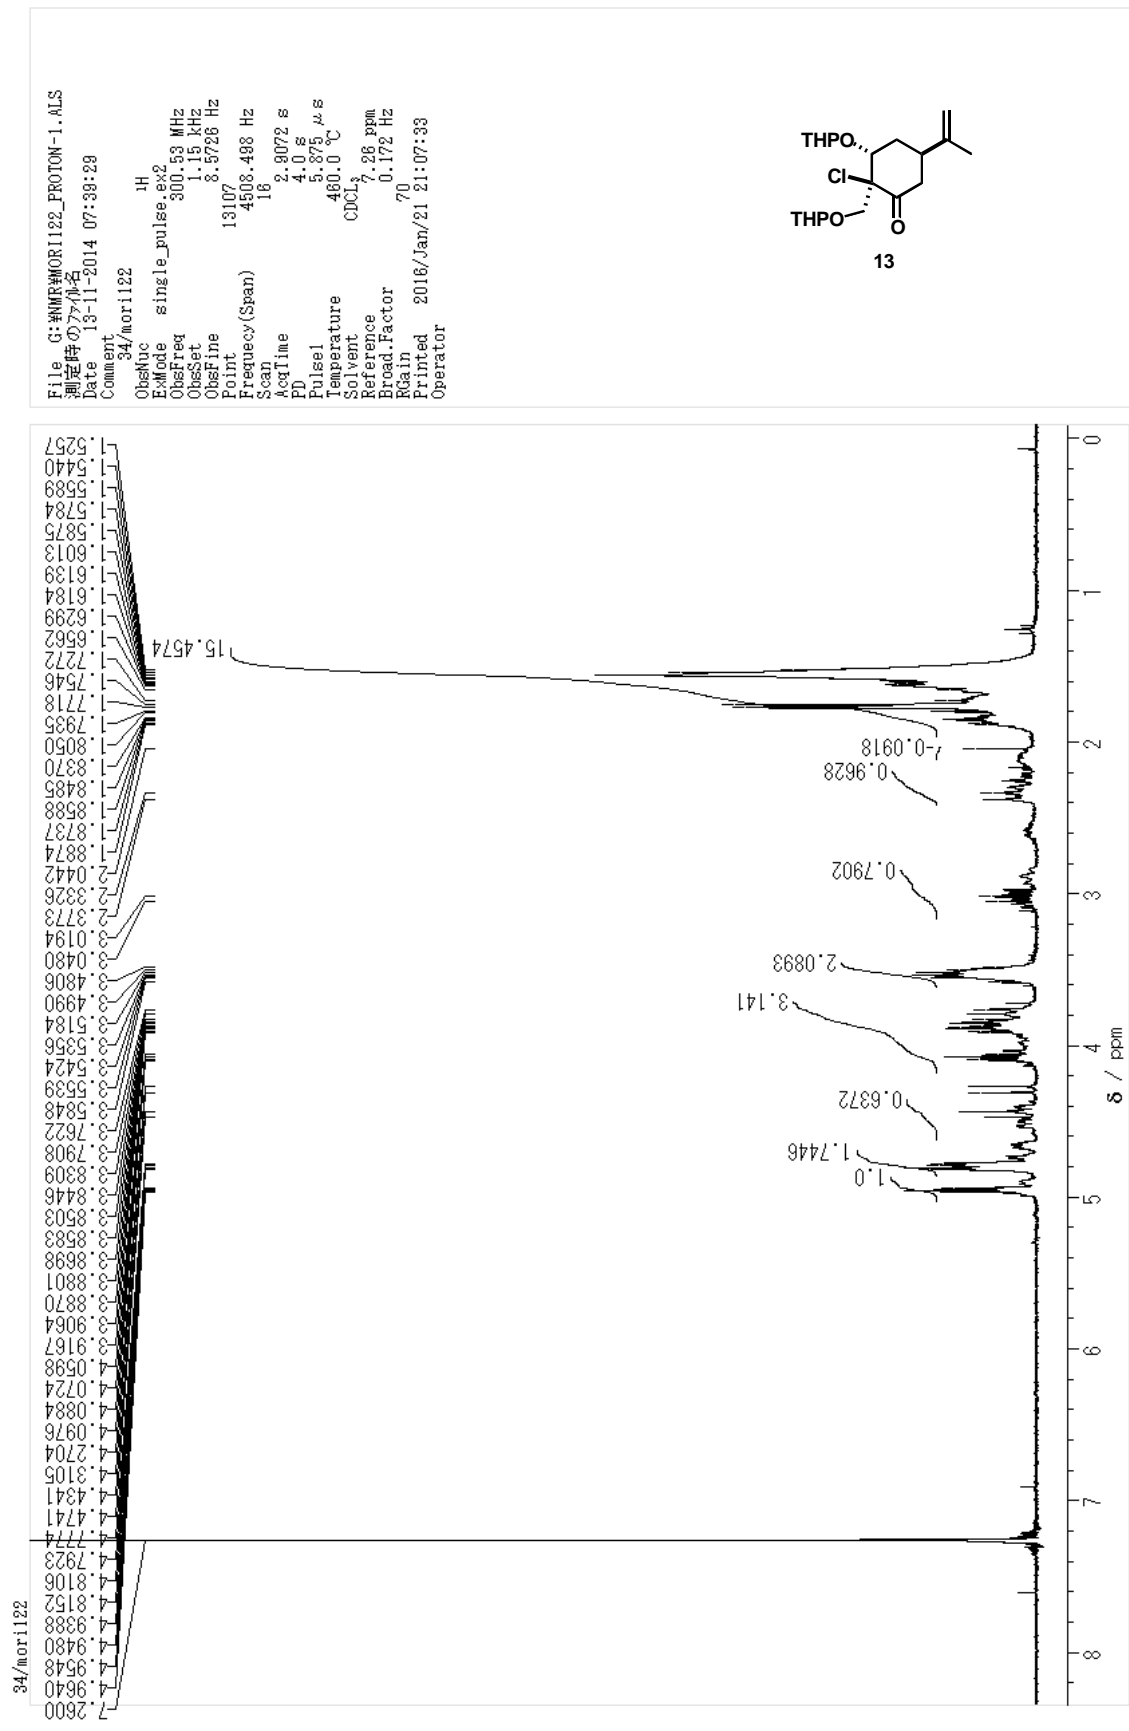

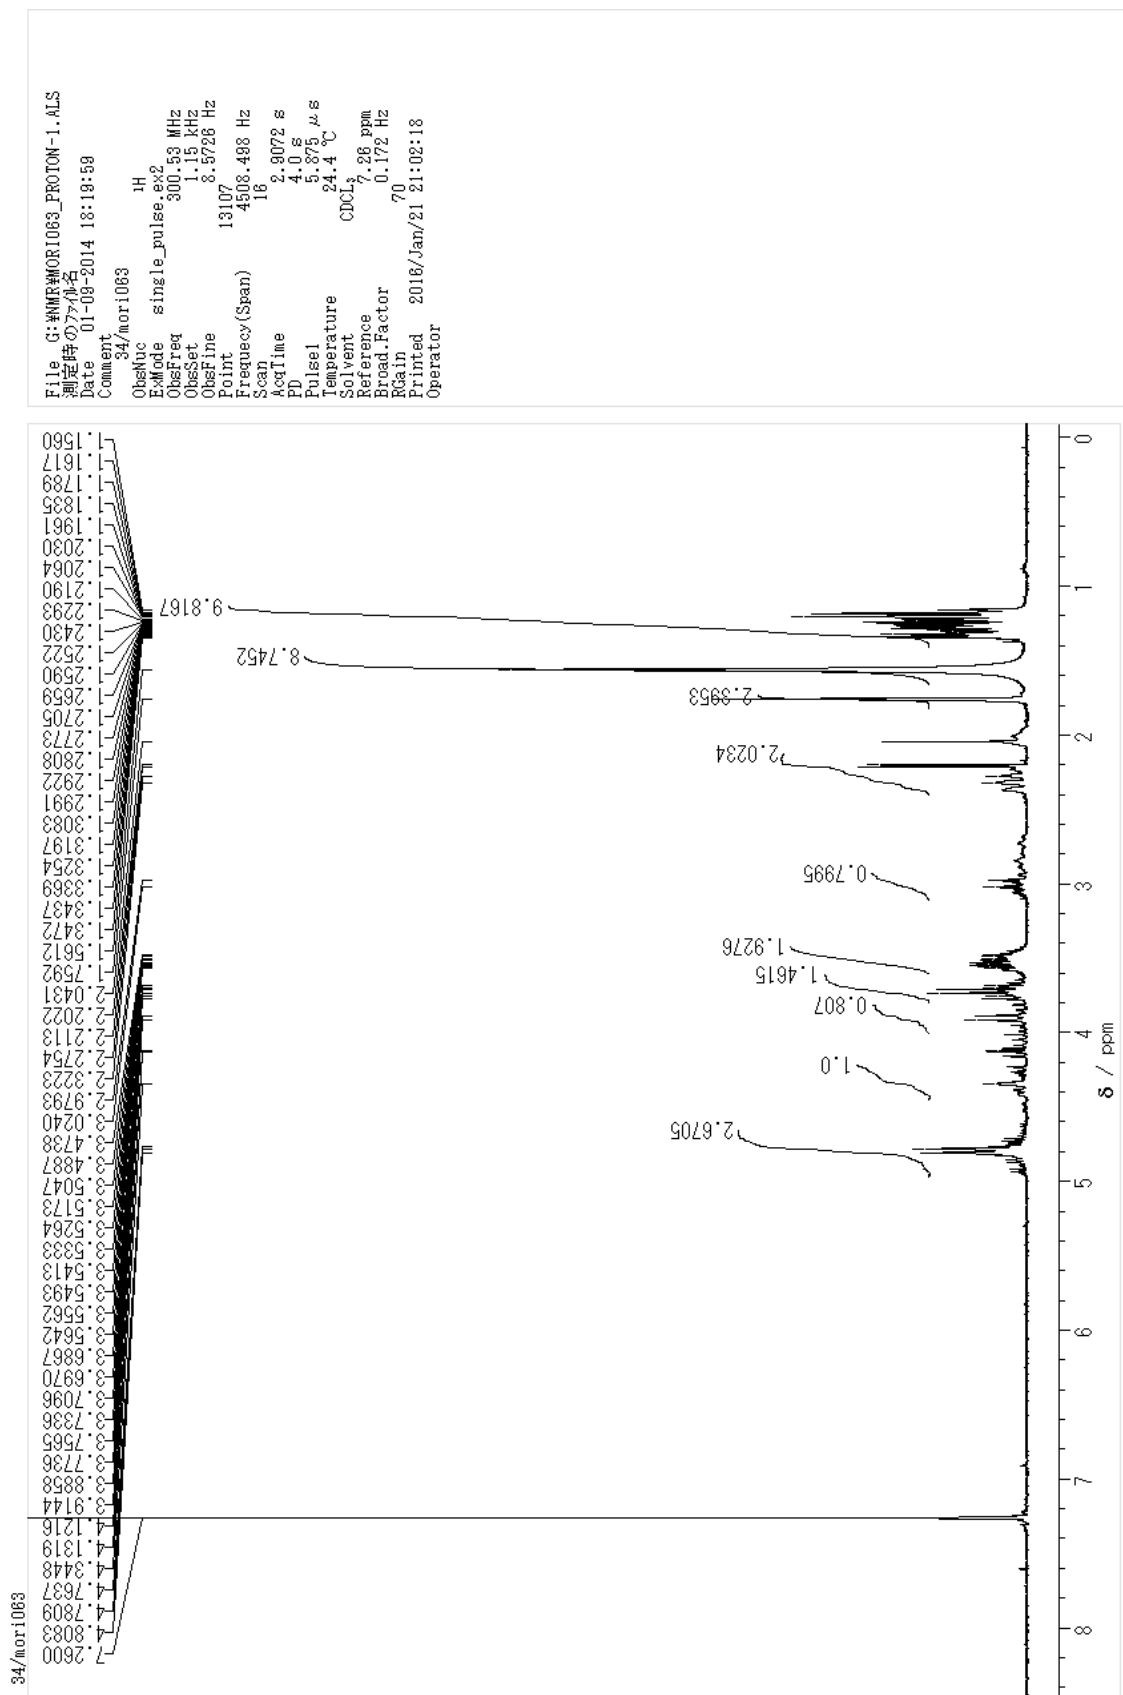

34kinura\_kobaku027

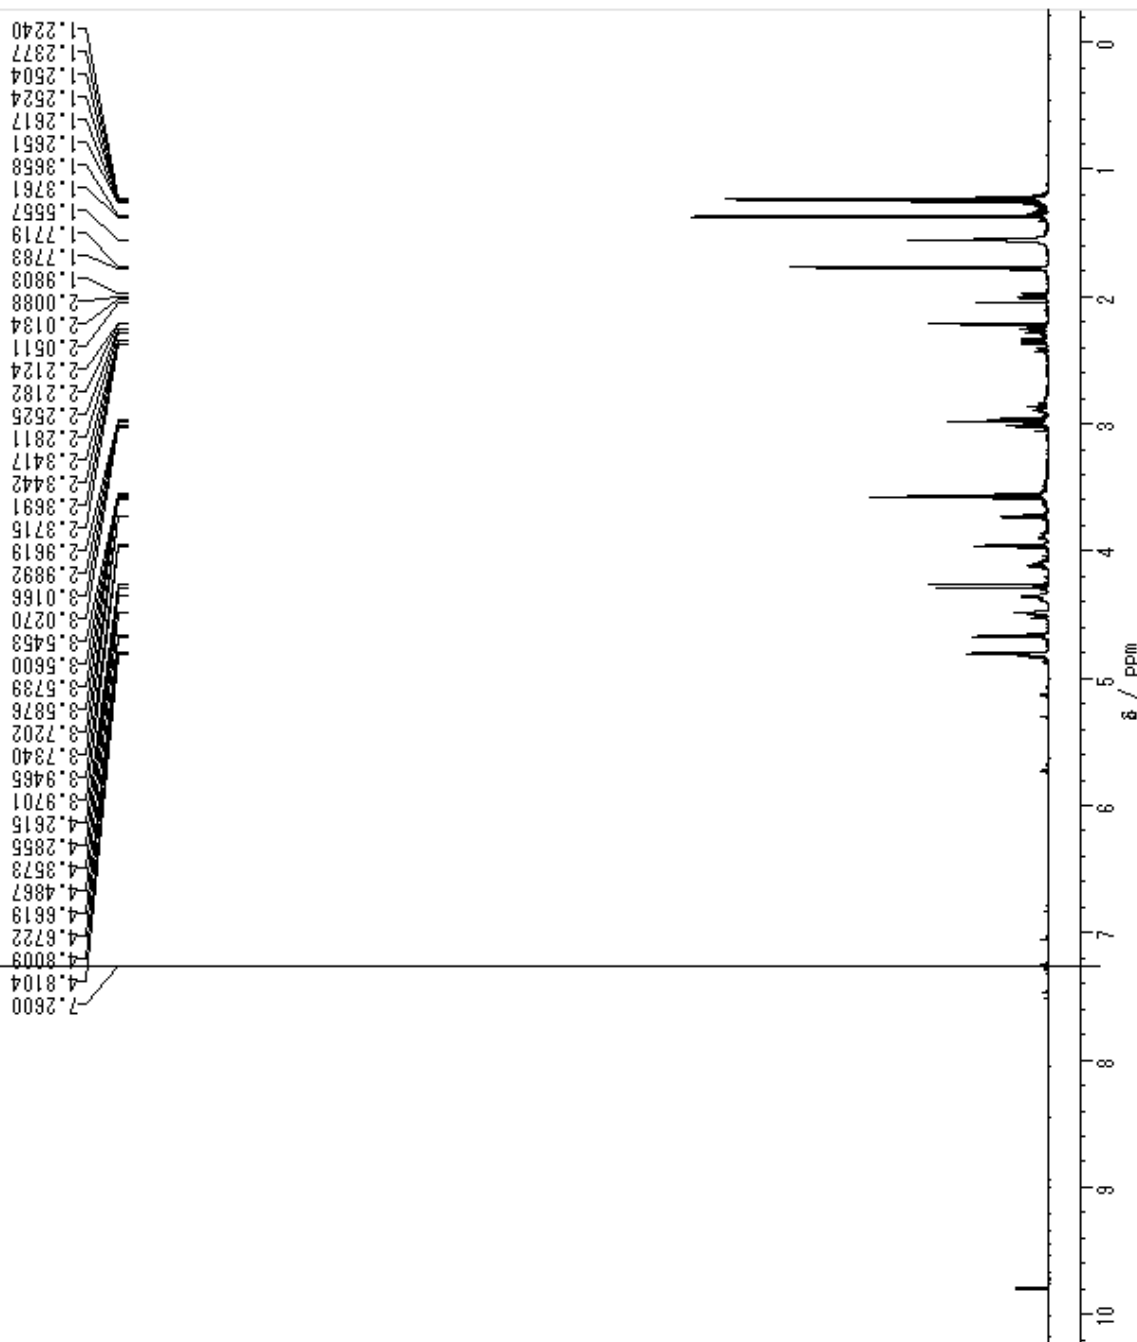

File C:\USER3\桌面\DESKTOP\12'的核磁谱图\12'.f2  
 测定時の7/16式  
 Date 07/Apr/2018 13:07:54  
 Comment 34kinura\_kobaku027  
 QbSduc single\_pulse\_v22  
 QbSfreq 500.16 MHz  
 QbSfret 2.41 GHz  
 QbSflne 6.0092 Hz  
 Point 13120  
 Frequency (Span) 7507.893 Hz  
 Scan 16  
 AcqLine 1  
 PO 1.7459 s  
 4.0 s  
 3.7 s  
 Pulse1 21.7 dB  
 Temperature CDCL3  
 Solvent  
 Reference 7.26 ppm  
 Broad Factor 0.2361 Hz  
 RGain 54  
 Printed 2019/Feb/28 10:32:02  
 Operator

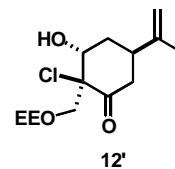

File C:\MSERS\デスクトップ\実験項目\ラモイ  
 2-1 実験結果\GC.RM1  
 測定機名: 771体主 F:\NMR\XMRM\ブルカ-1\201902  
 Date 2019/02/28 00:00:00  
 Comment nakamura600

OpMode 1H  
 ExMode ZPG30  
 ObsFrd 100.61 MHz  
 ObsRes 0.0 kHz  
 ObsFinc 9998.688 Hz  
 Point 32768  
 Frequency (Span) 24038.46 Hz  
 Scan 0  
 Acquire 1.8631 s  
 PD 0.0 s  
 Pulse 10.0  $\mu$ s  
 Temperature 0.0  $^{\circ}$ C  
 Solvent CDCl<sub>3</sub>  
 Reference 77.16 ppm  
 Broad.Factor 0.3668 Hz  
 RGain 0  
 Printed 2019/02/28 10:33:58  
 Operator

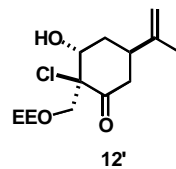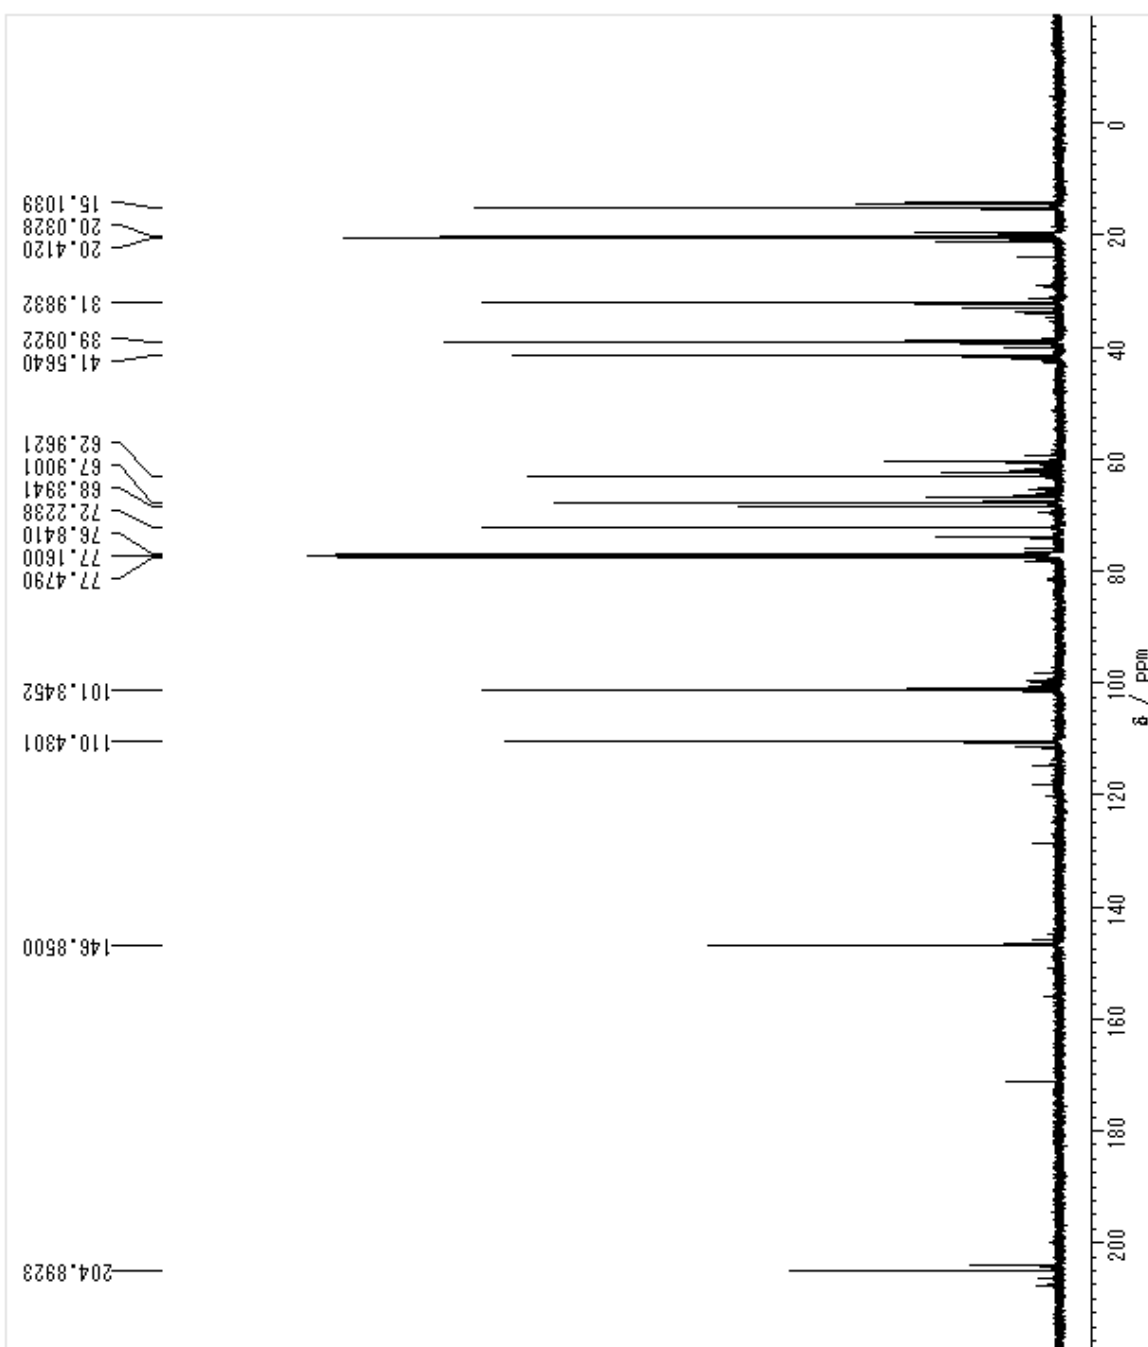

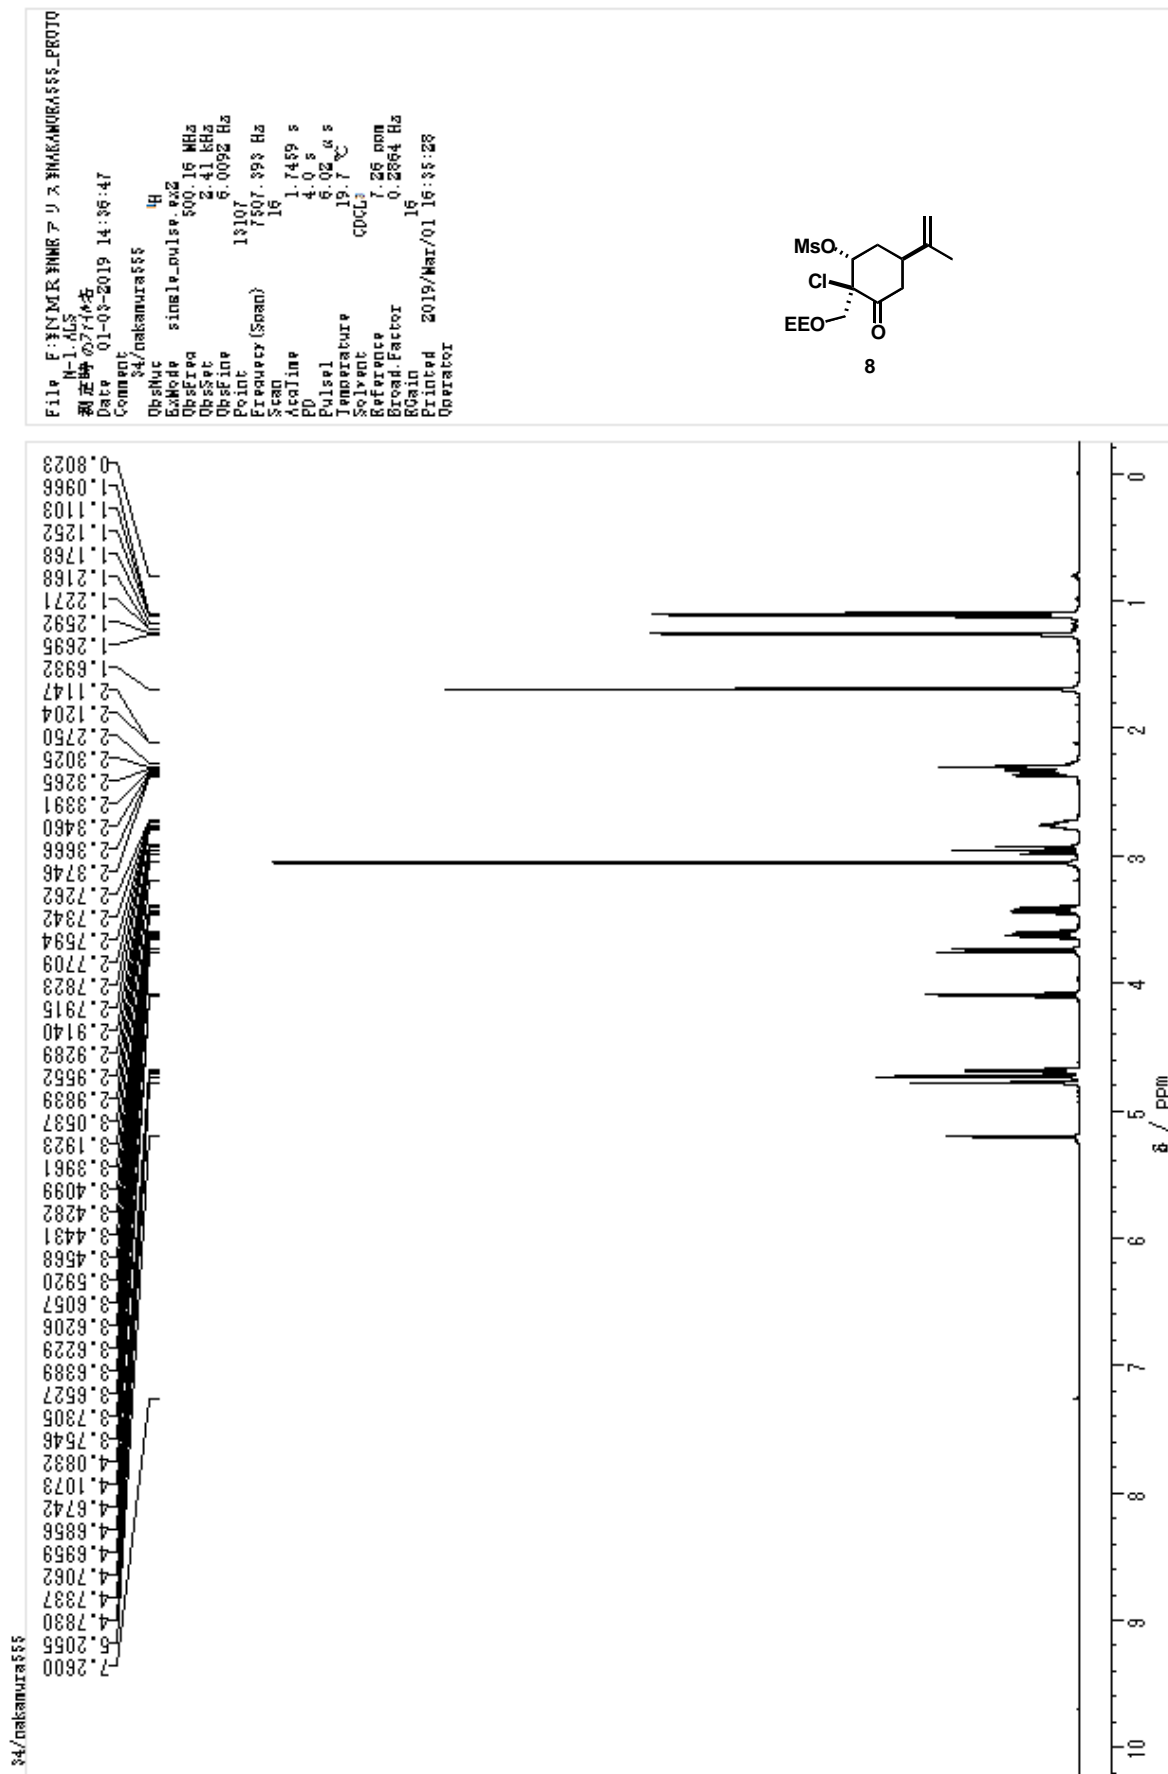



S4/nakamura555

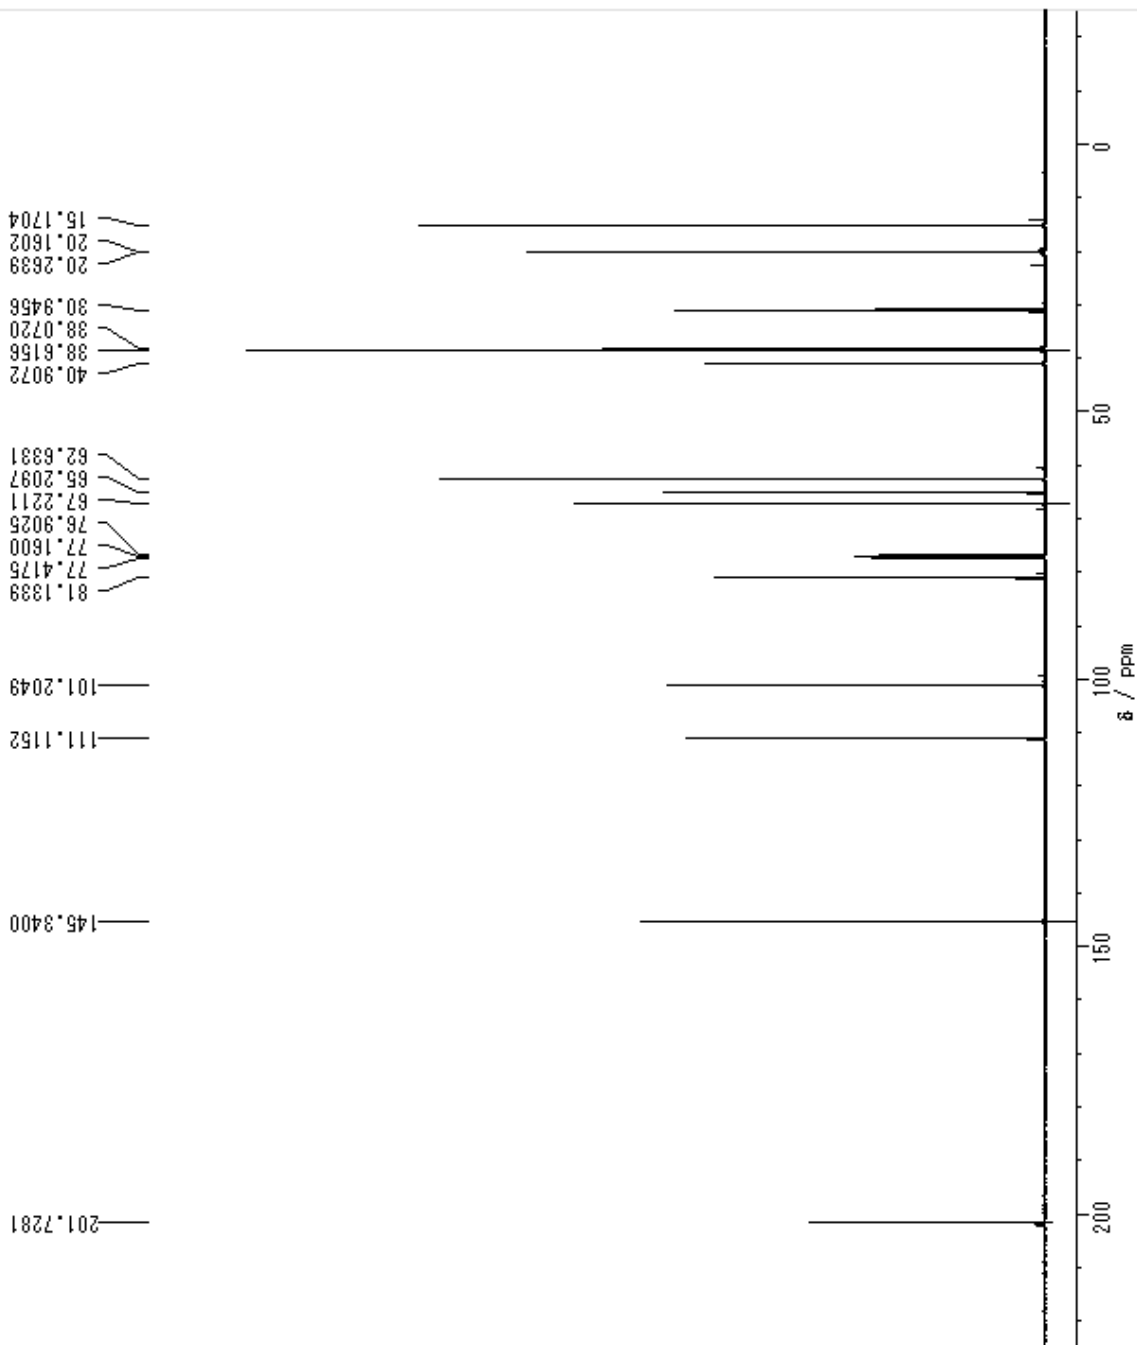

File F:\NMR\NMR アリス 555\NAKAMURA555\_CARB0  
 N-1\_AUS  
 新卒 納の774号  
 Date 01-08-2019 15:25:54  
 Comment  
 S4/nakamura555 uc  
 QbShtc  
 ExMchE single\_pulse\_dec  
 QbShtc 125.77 MHz  
 QbShtc 7.87 MHz  
 QbShtc 4.2131 Hz  
 Point 26214  
 Frequency(Span) 31446.06 Hz  
 Scan 1024  
 Acoline 0.8336 s  
 PD 2.0 s  
 Pulse 3.8867 us  
 Temperature 20.5 °C  
 Solvent CDCl3  
 Reference TMS  
 Broad factor 77.16 ppm  
 Gain 0.3398 Hz  
 K0ain 82  
 Printed 2019/Mar/01 16:41:55  
 Operator

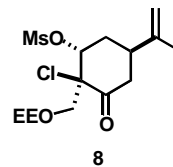

File C:\USERS\天橋\Desktop\TOPY\実験項目用フォルダ  
 4EAY\4EAY.H RM1 E:\NMR\MLE\NMRフォルダ\4EAY\4EAY.D  
 測定機:CPY-400  
 Date 2019/02/28 00:00:00  
 Comment nakamura125

ObsNuc H  
 ExpMode zg30  
 ObsFreq 400.12 MHz  
 ObsP1 0.0 kHz  
 ObsP2 10003.76 Hz  
 Point 65536  
 Frequency (Scan) 8012.82 Hz  
 Scan 0  
 Acquire 8.1789 s  
 PD 0.0 s  
 Pulse 10.0 s  
 Temperature 0.0 C  
 Solvent CDCl<sub>3</sub>  
 Reference 7.26 ppm  
 Broad.Factor 0.0611 Hz  
 RGain 0  
 Printed 2019/Feb/28 10:50:35  
 Operator

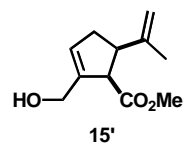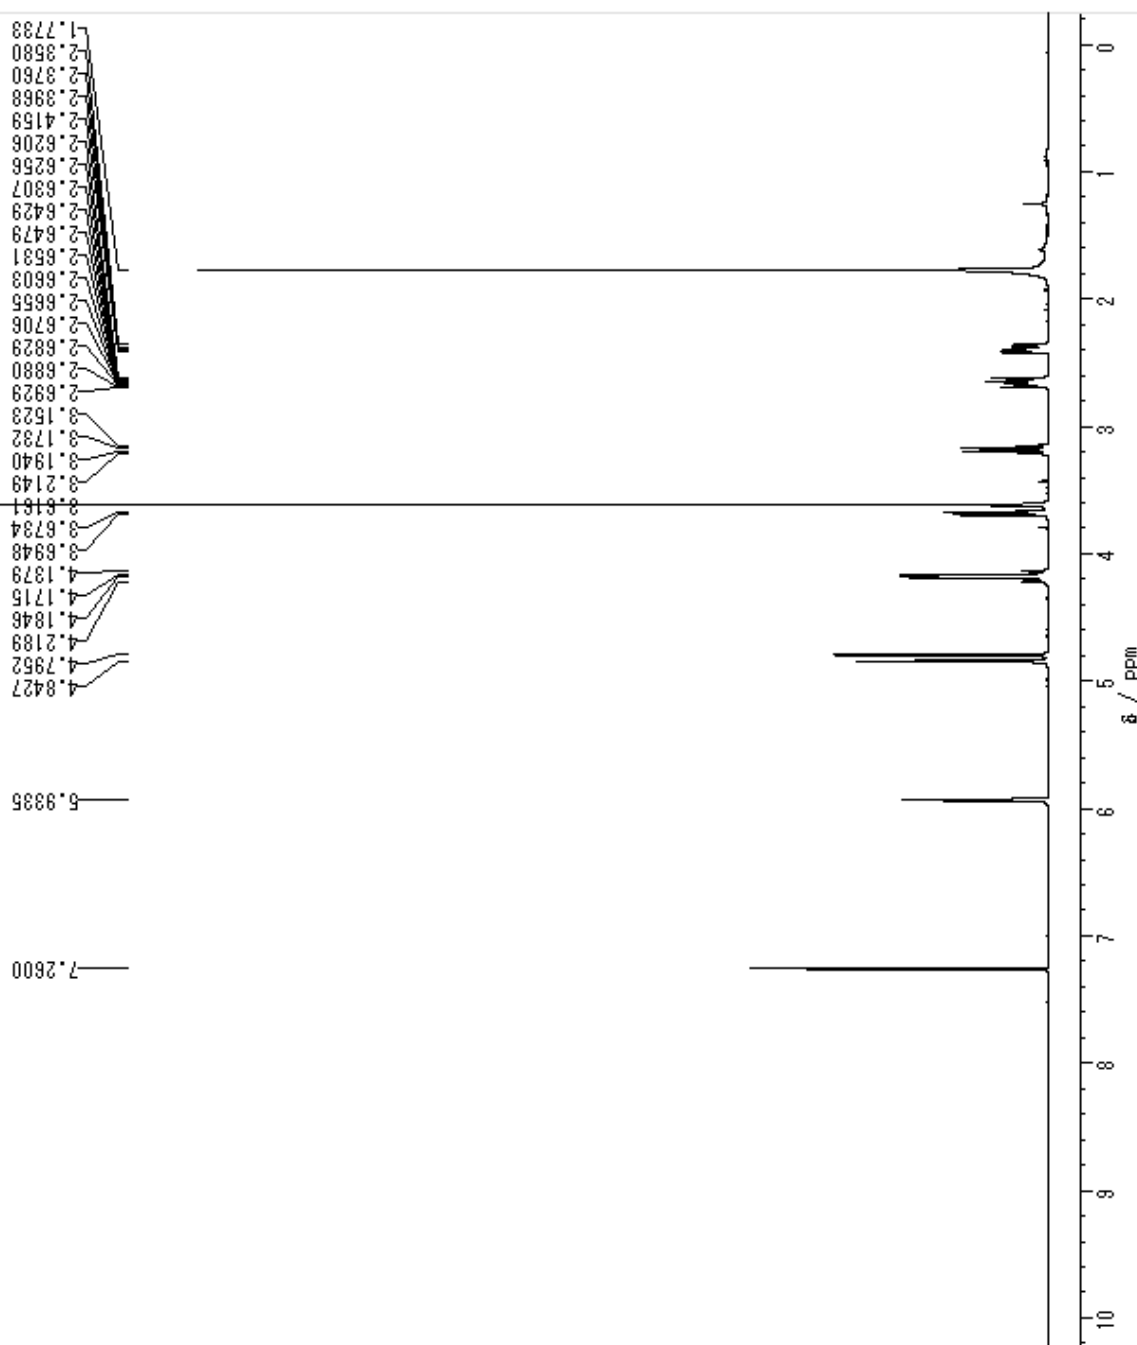

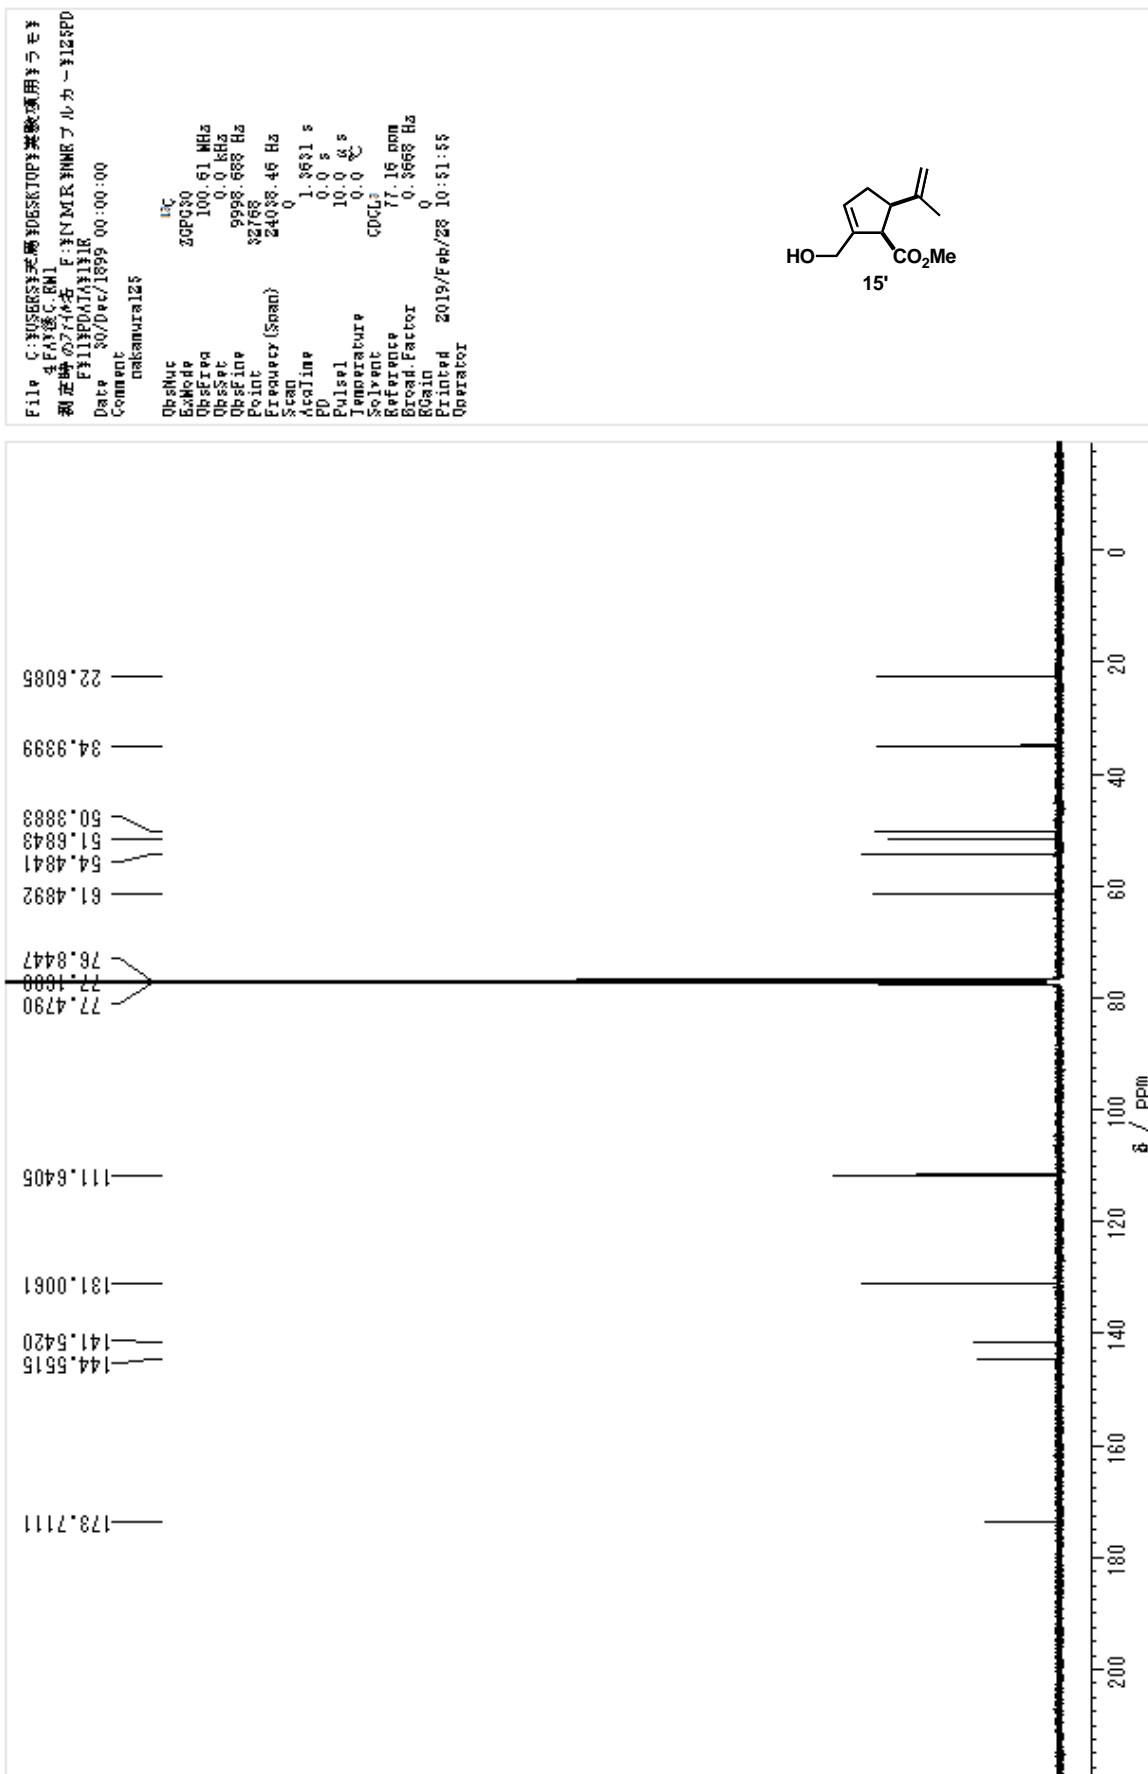

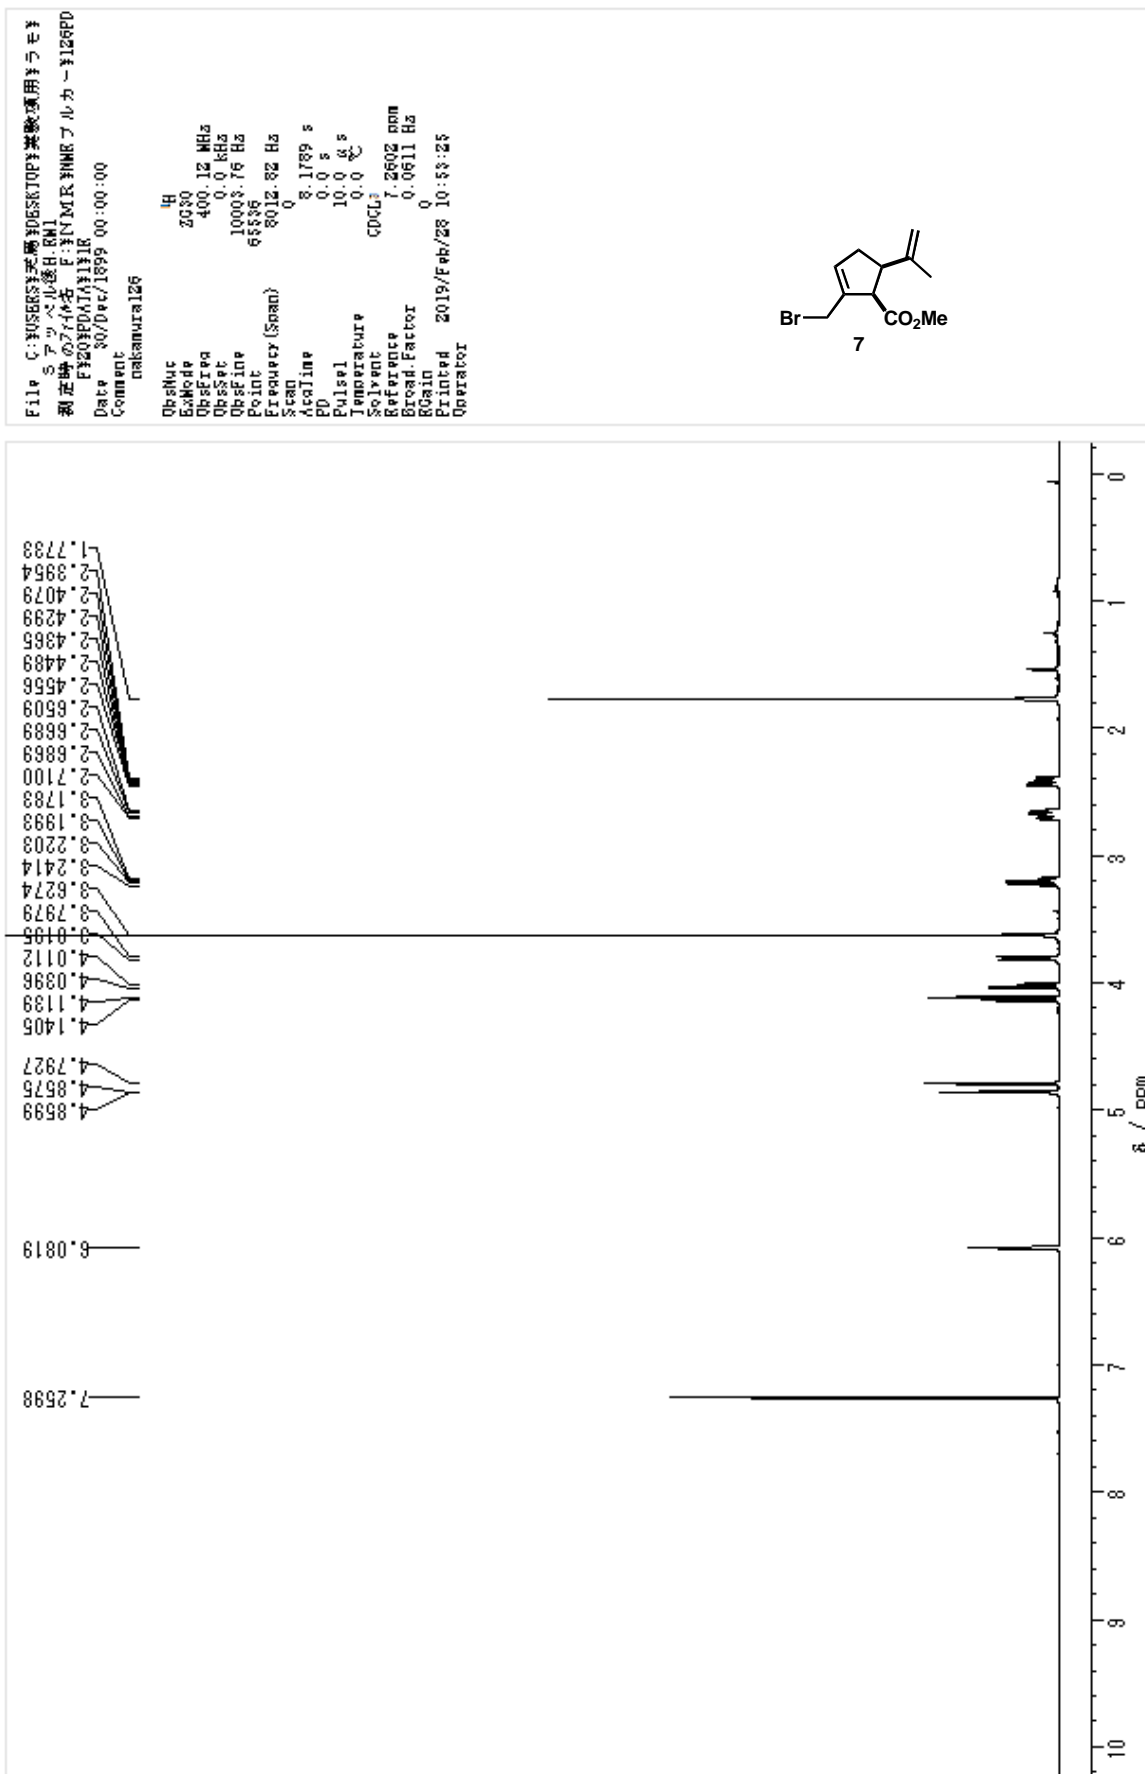

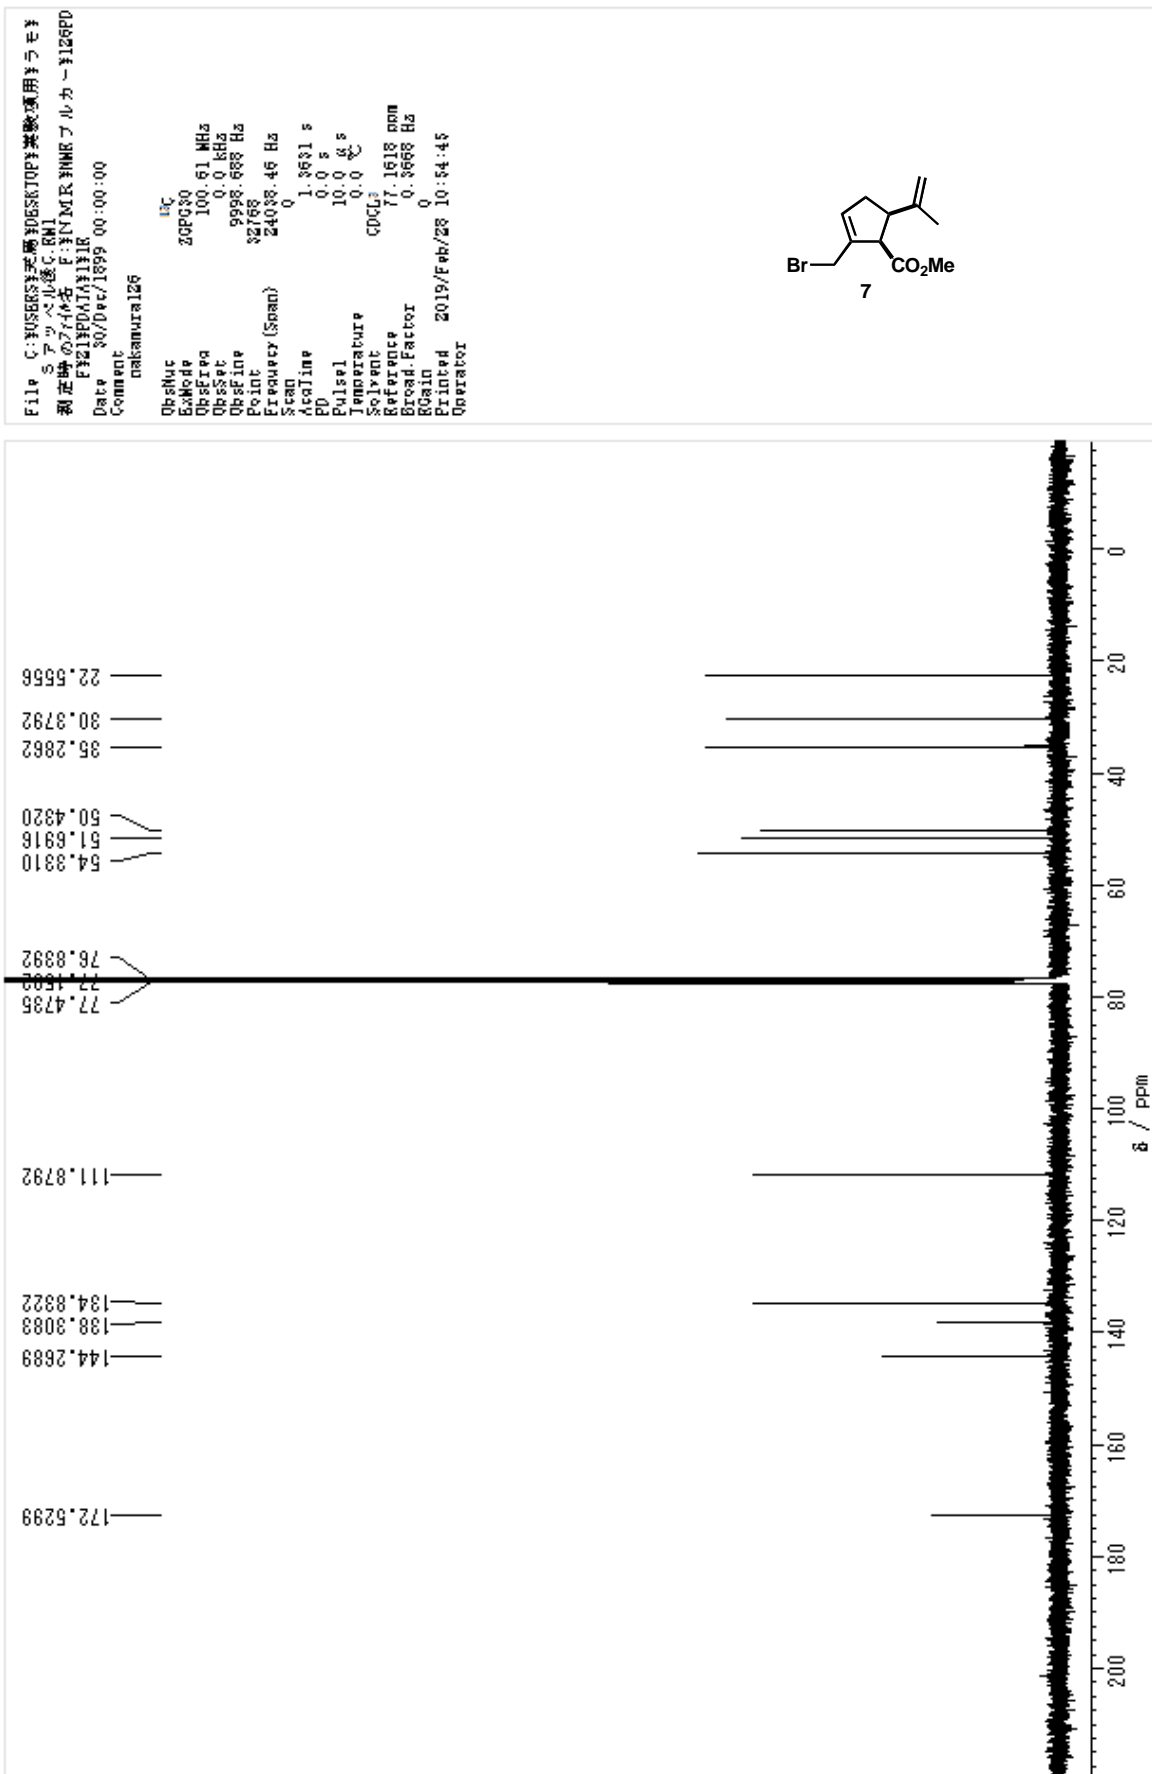

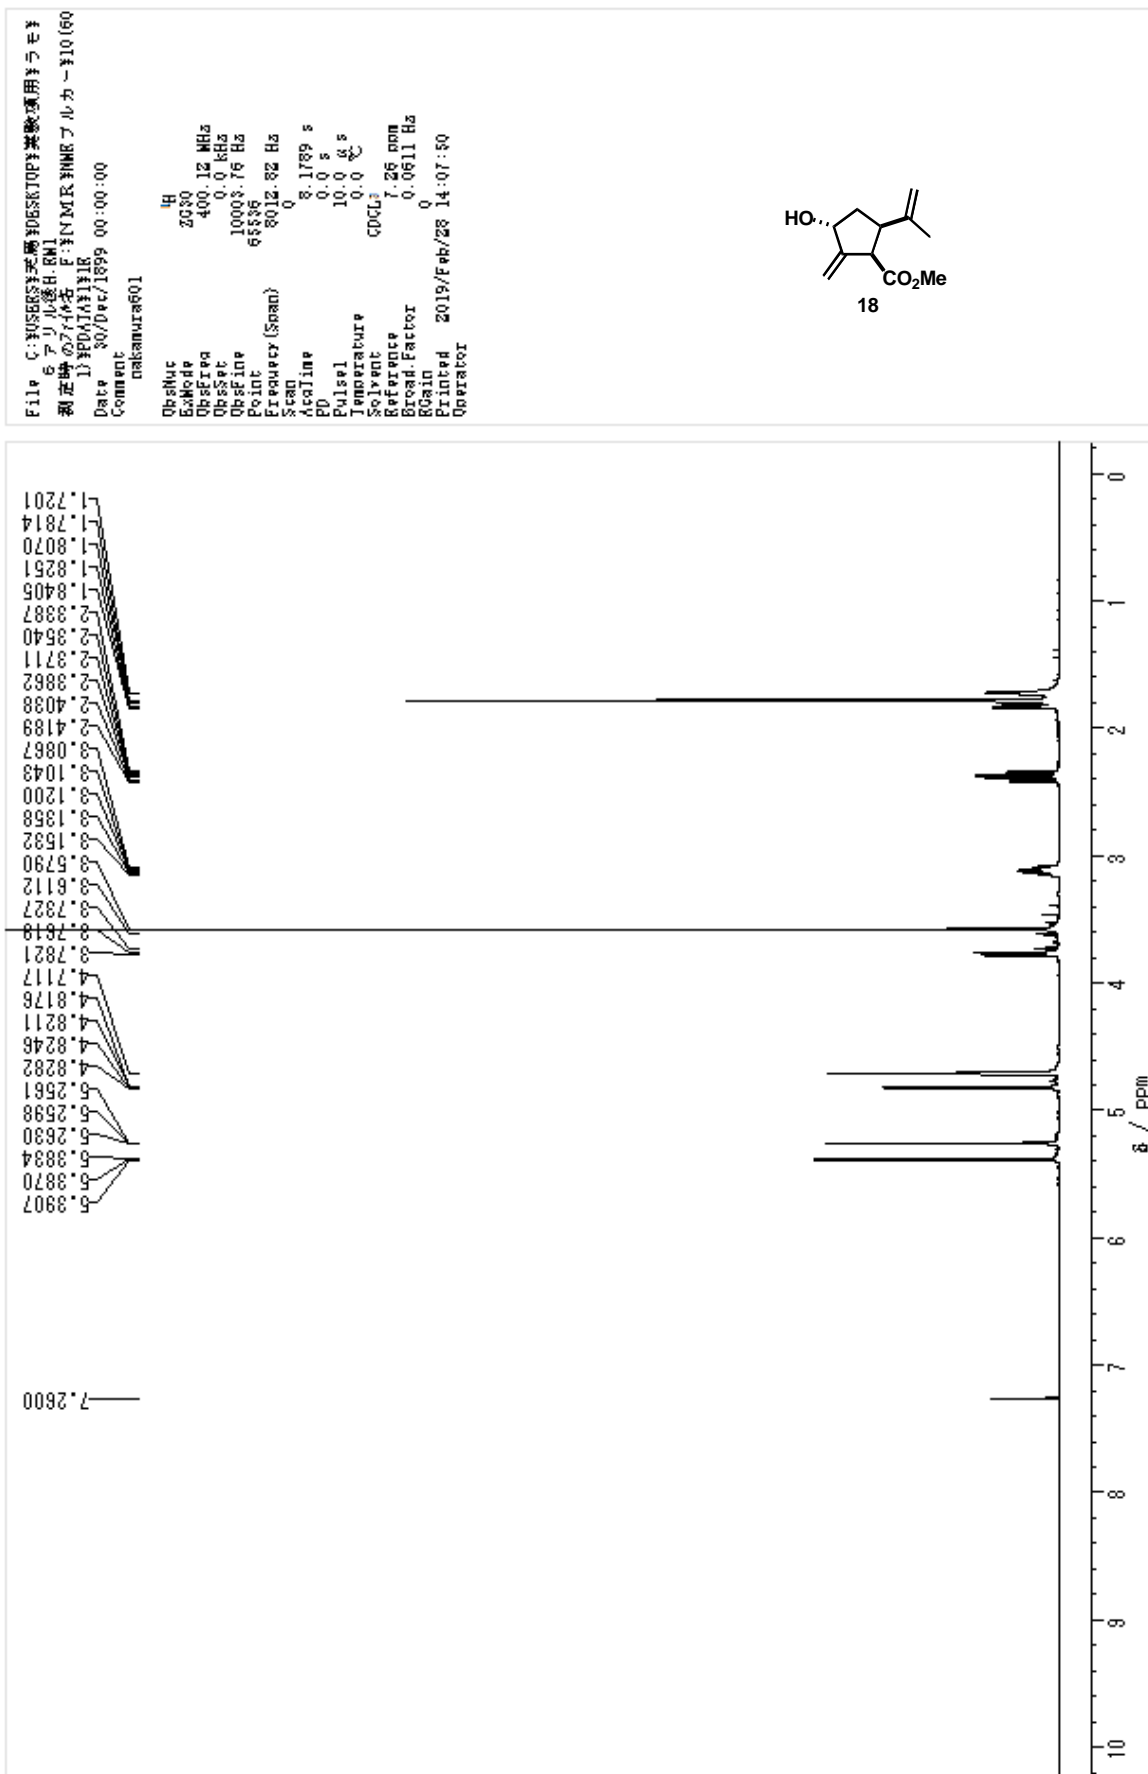

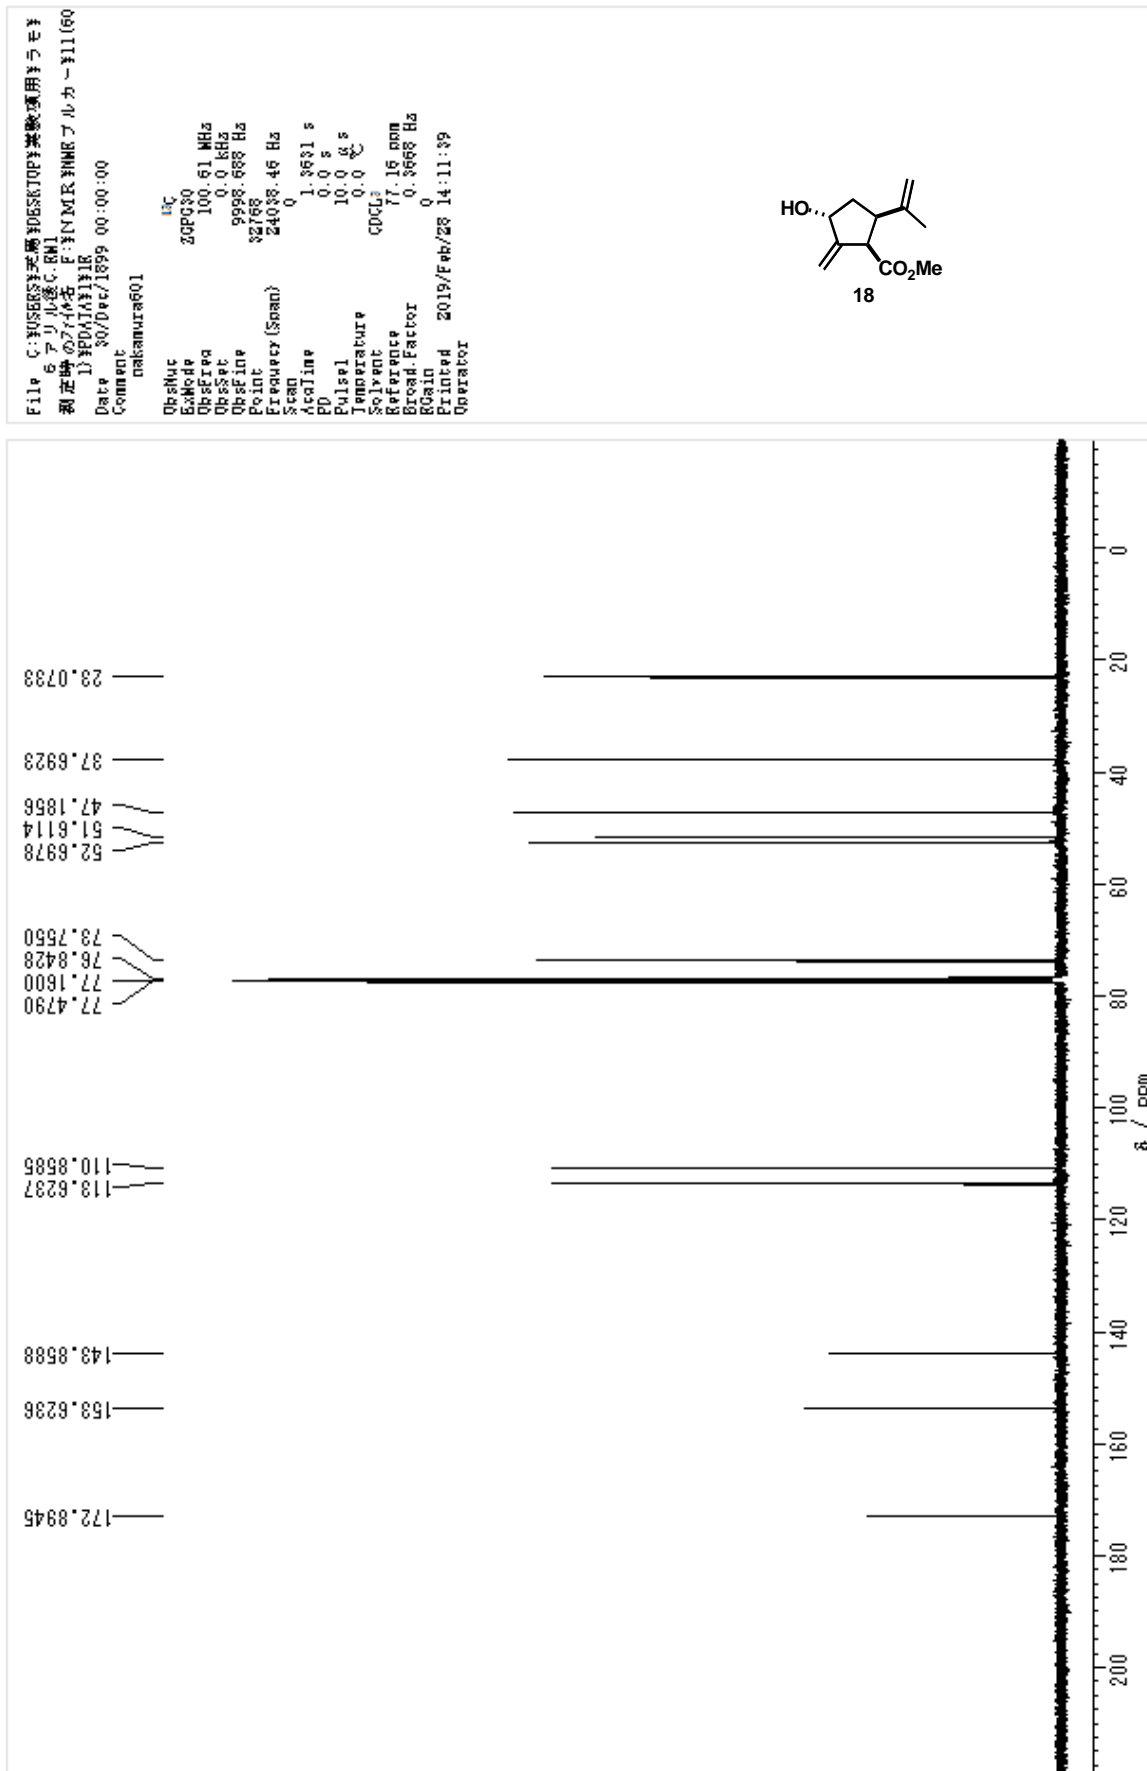

File C:\MSERS\実験\DESKTOP\実験項目\ラマヤ  
 1 五島 隆夫 トン H.NM  
 測定機 本体名 F:\NMR\NMR プルカ - 120 (50)  
 Date 2020/11/18  
 Comment 307Dec1899 00:00:00  
 nakamura602

ObsNut H  
 ExMode ZG30  
 ObsFreq 400.12 MHz  
 ObsSet 0.0 kHz  
 ObsPine 10003.76 Hz  
 Point 65536  
 Frequency (Span) 8012.82 Hz  
 Scan 0  
 Acquire 8.1789 s  
 PD 0.0 s  
 Pulse 10.0 s  
 Temperature 0.0 C  
 Solvent CDCl<sub>3</sub>  
 Reference 7.26 ppm  
 Broad.Factor 0.0611 Hz  
 RGain 0  
 Printed 2019/Feb/28 14:16:33  
 Operator

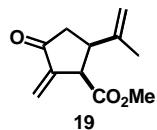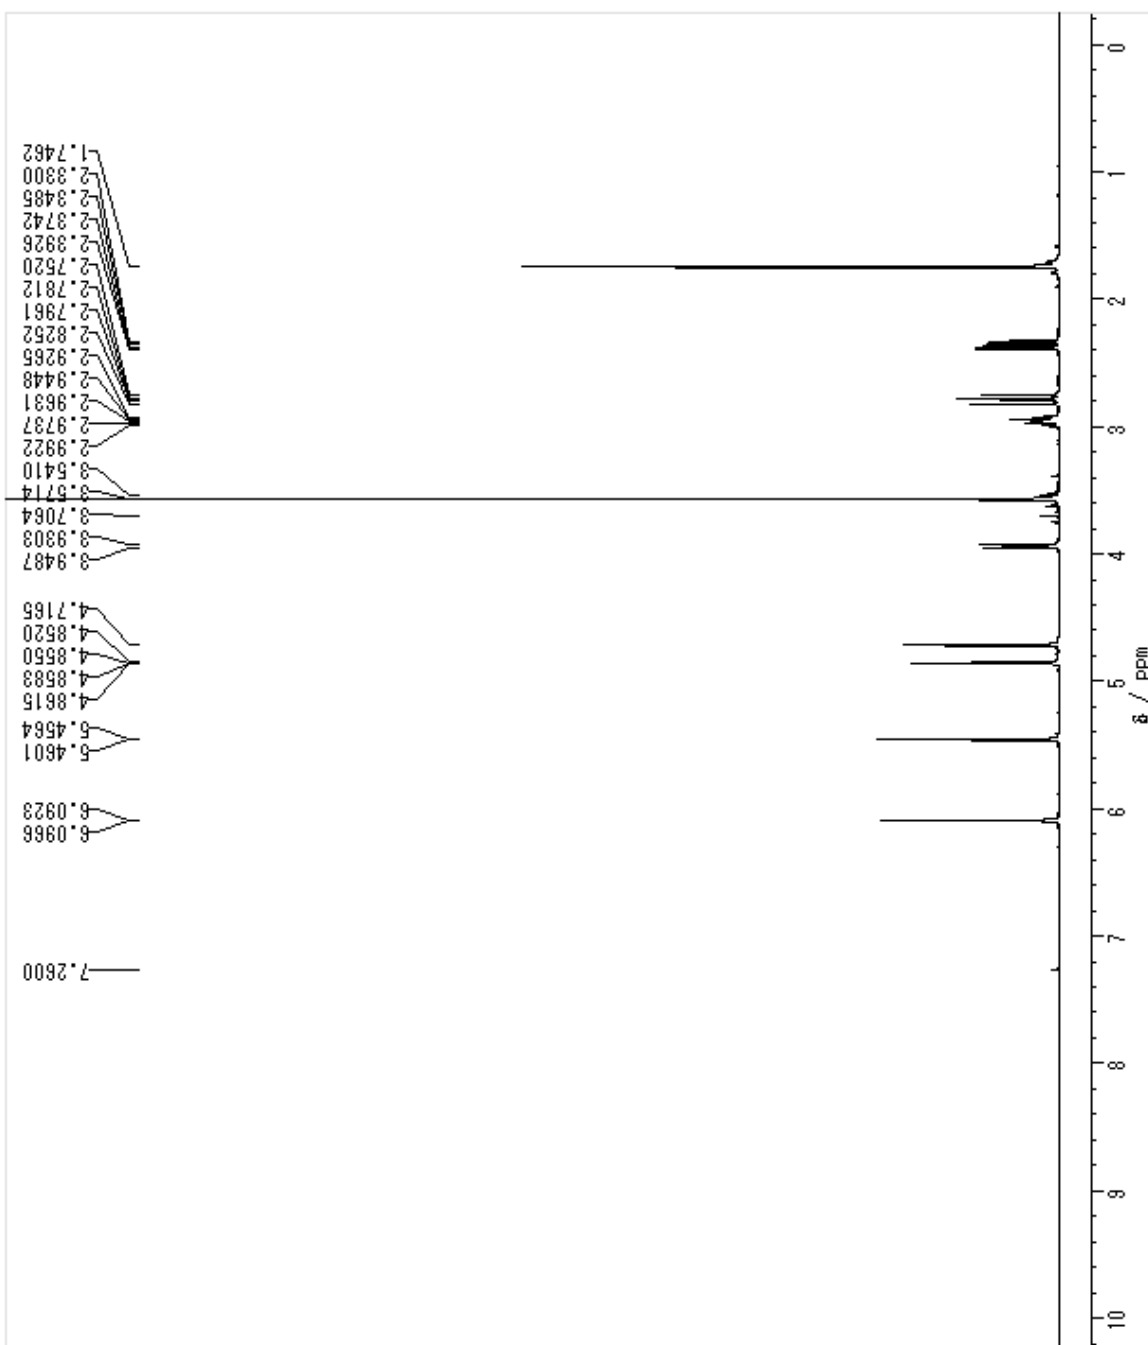



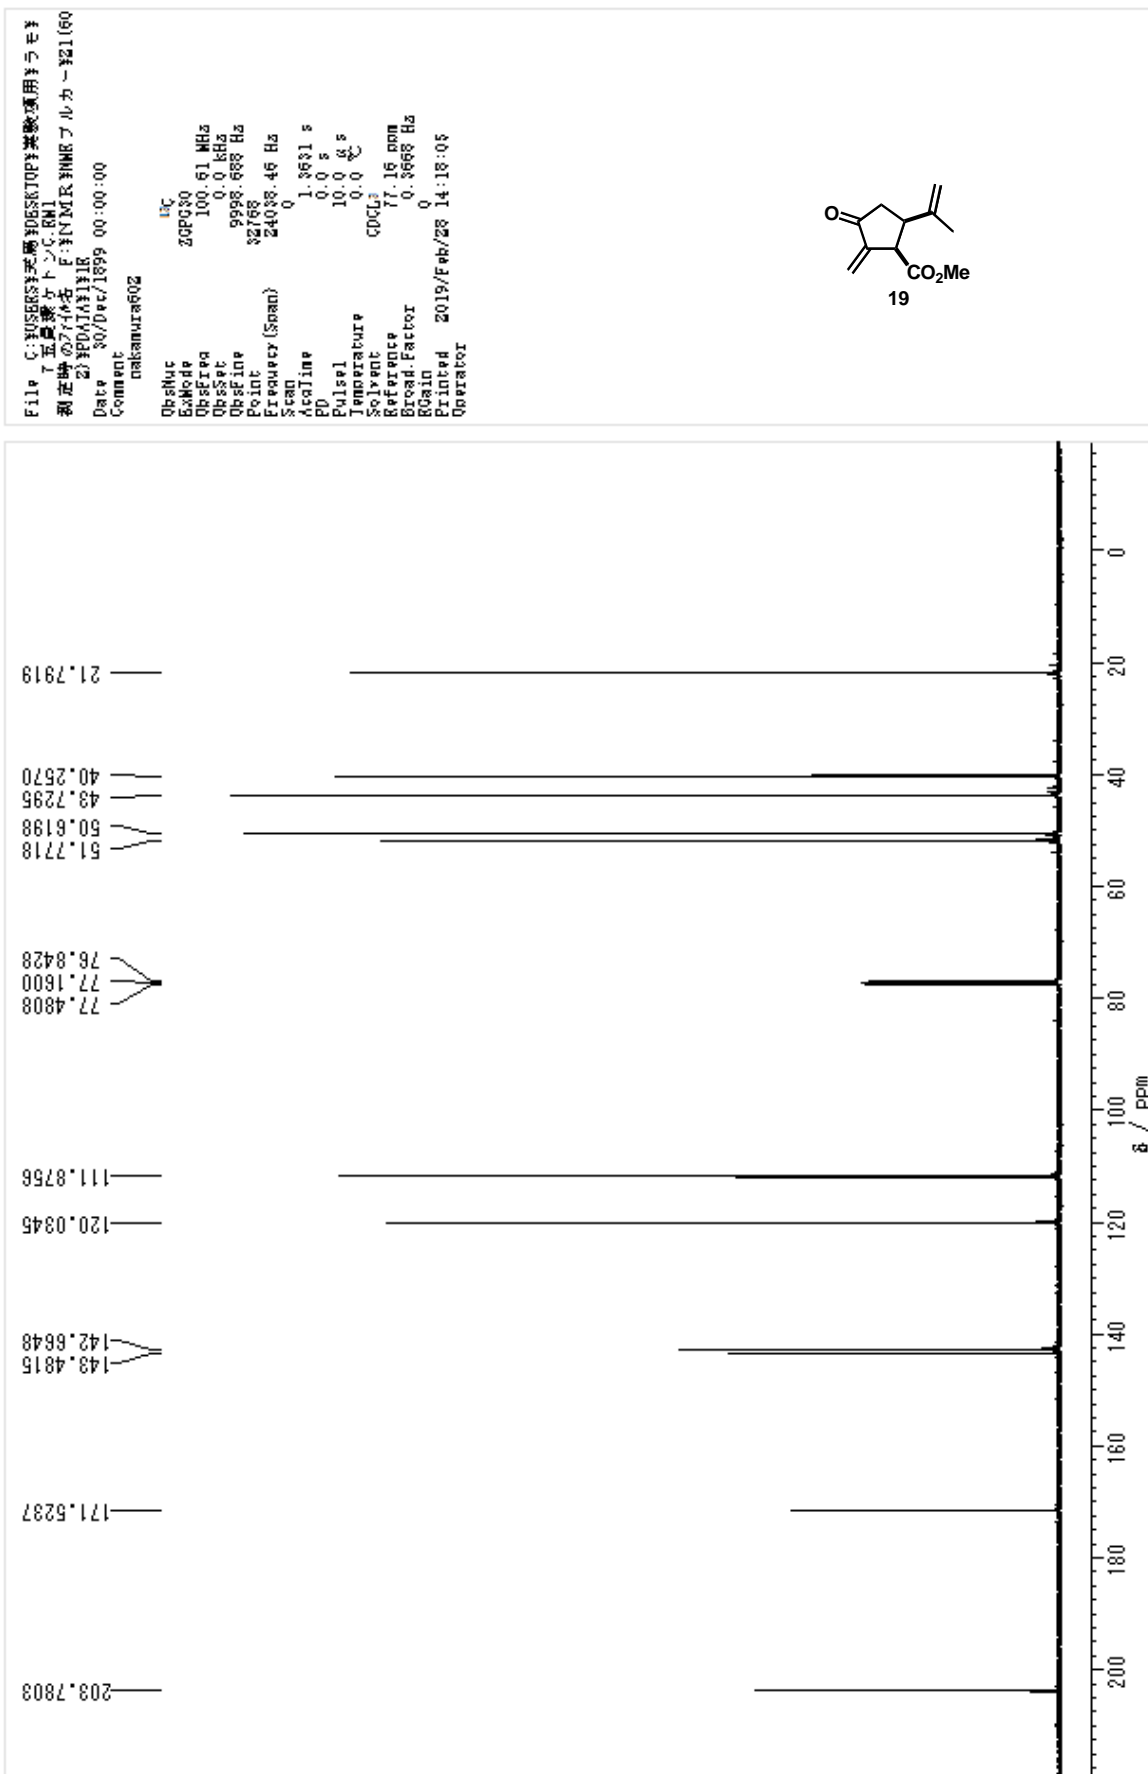

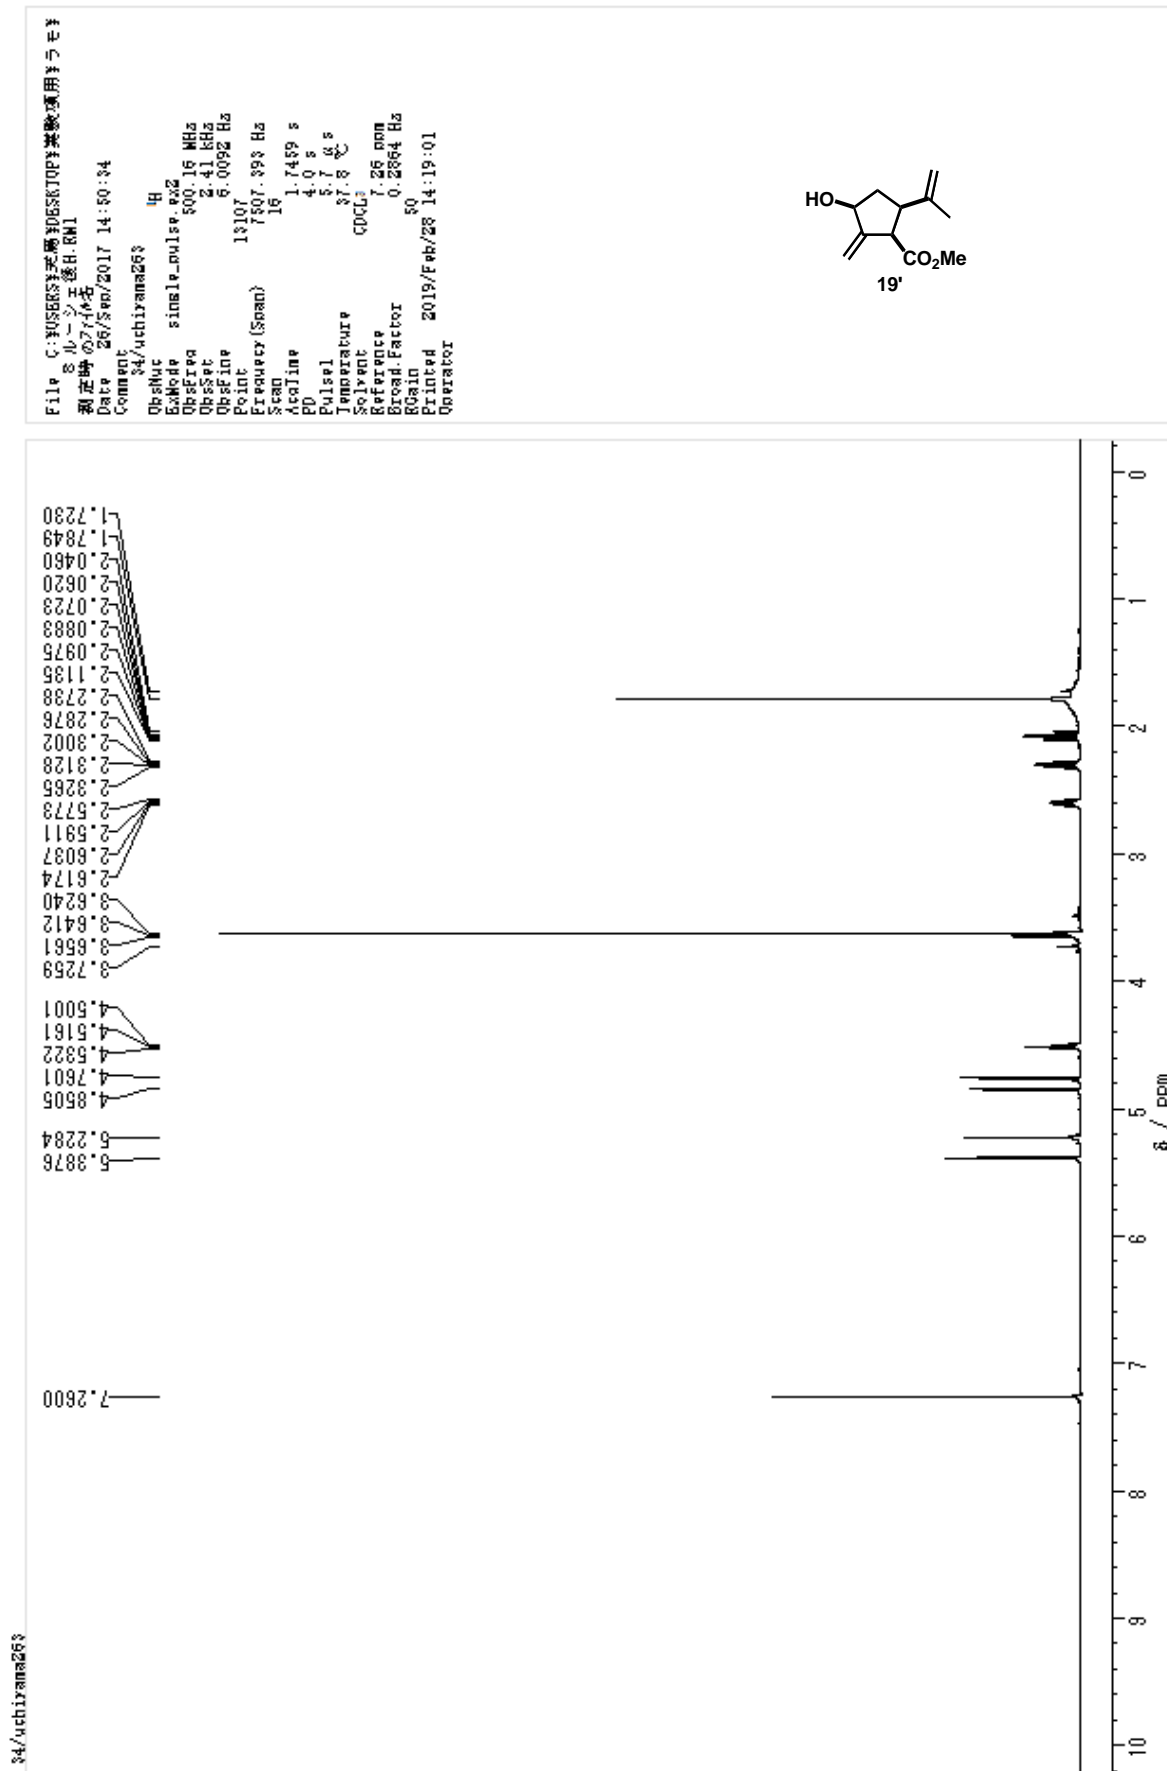

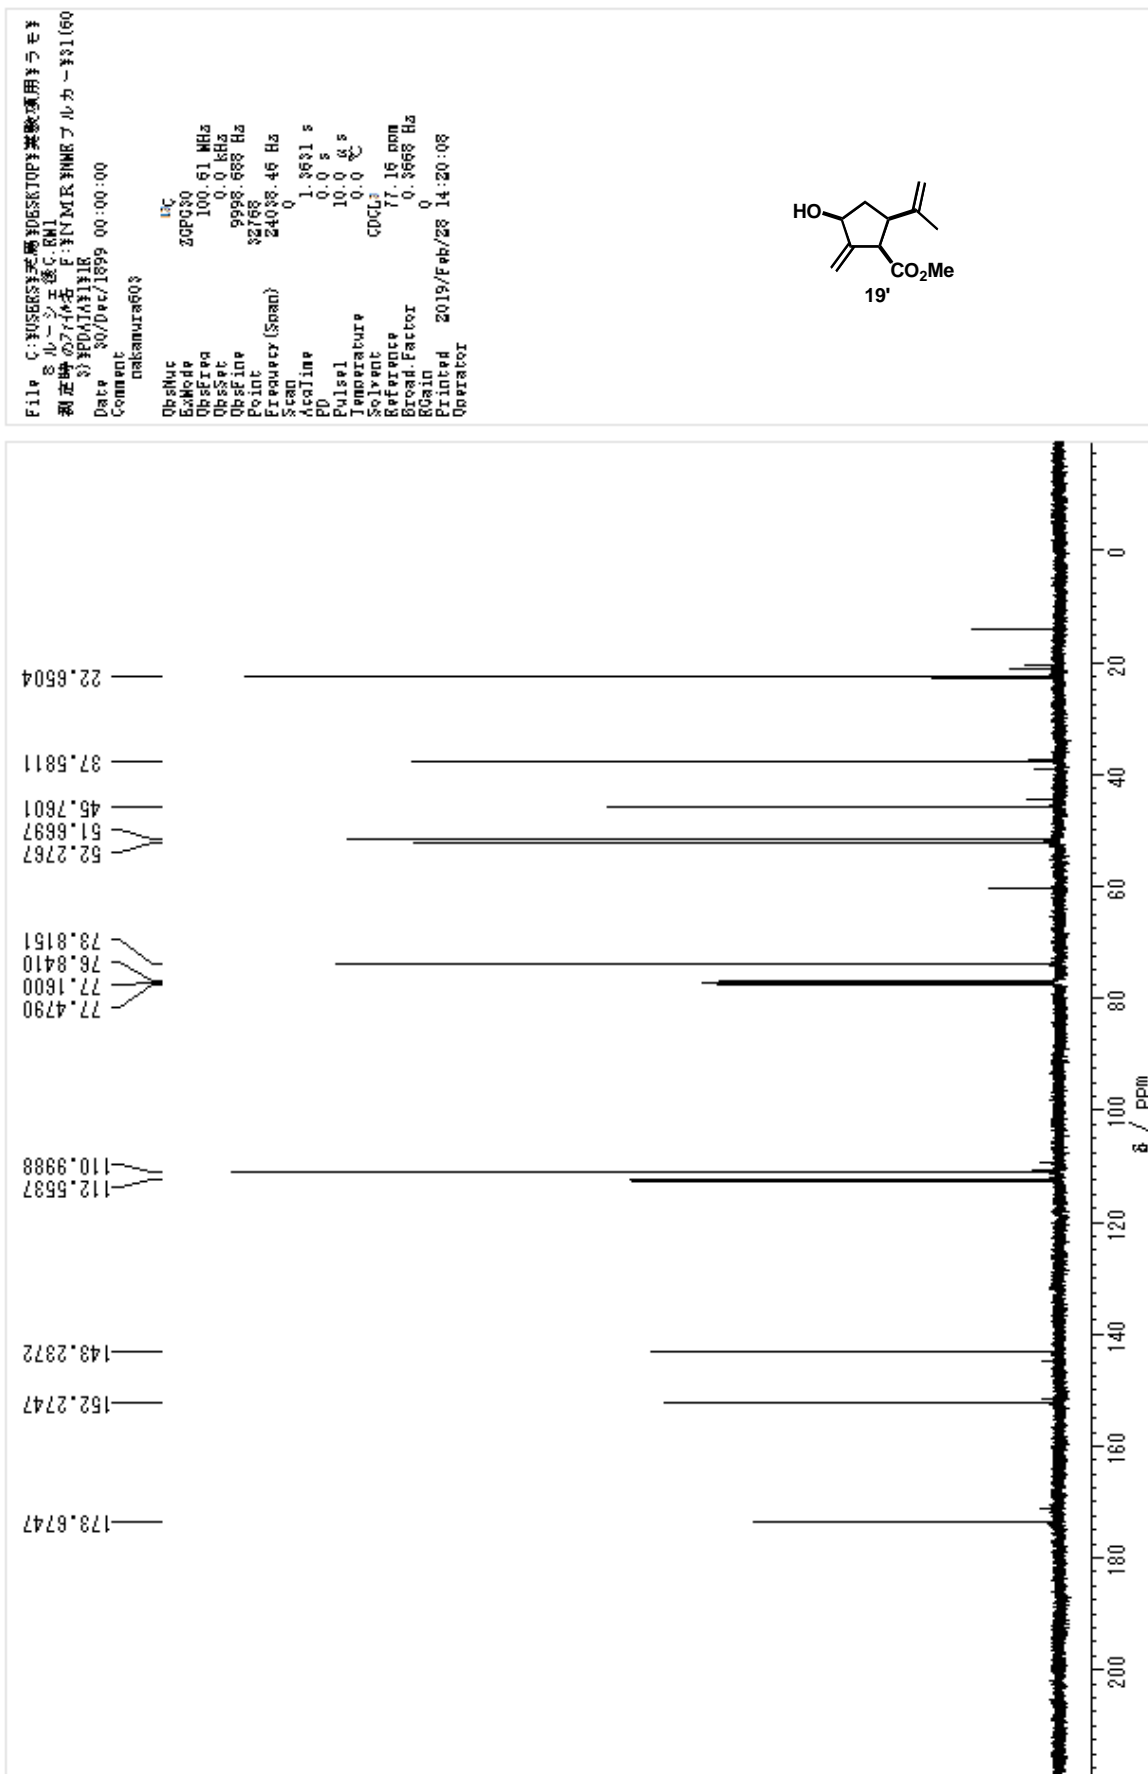

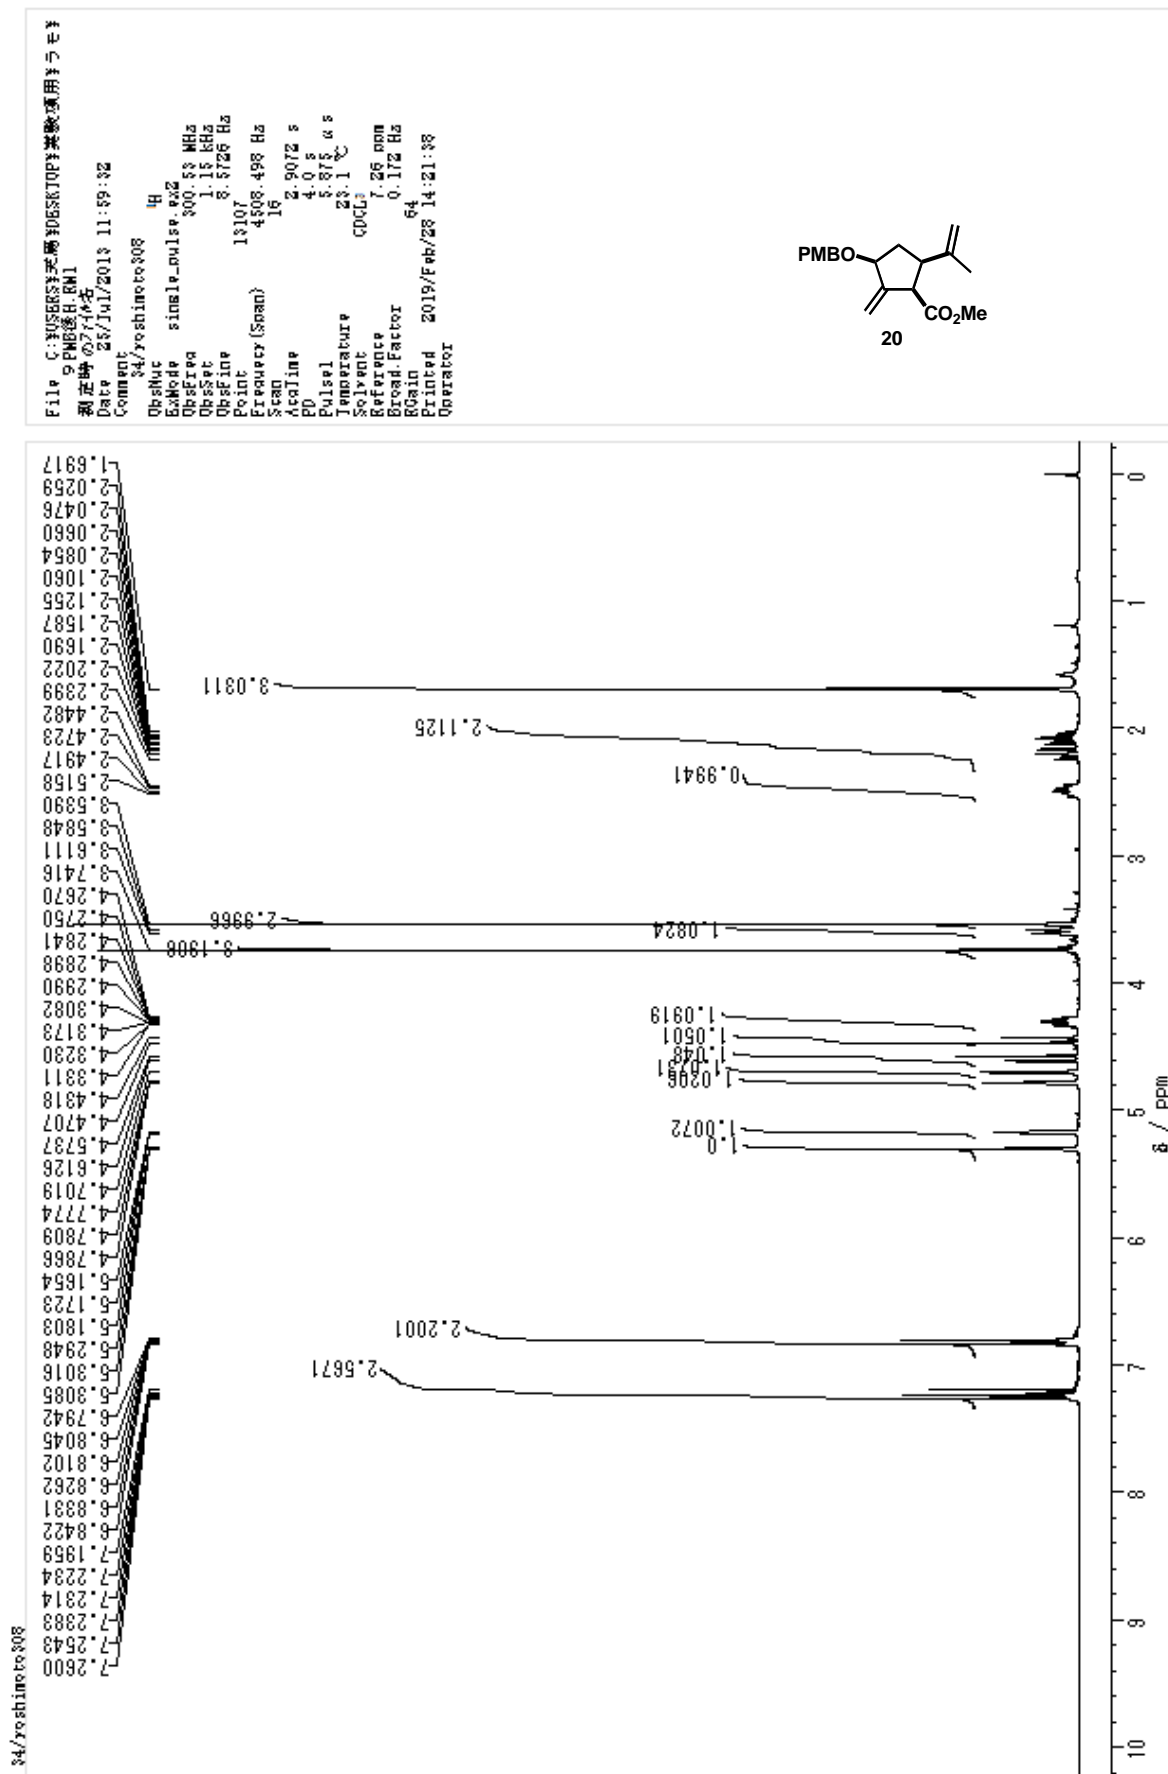

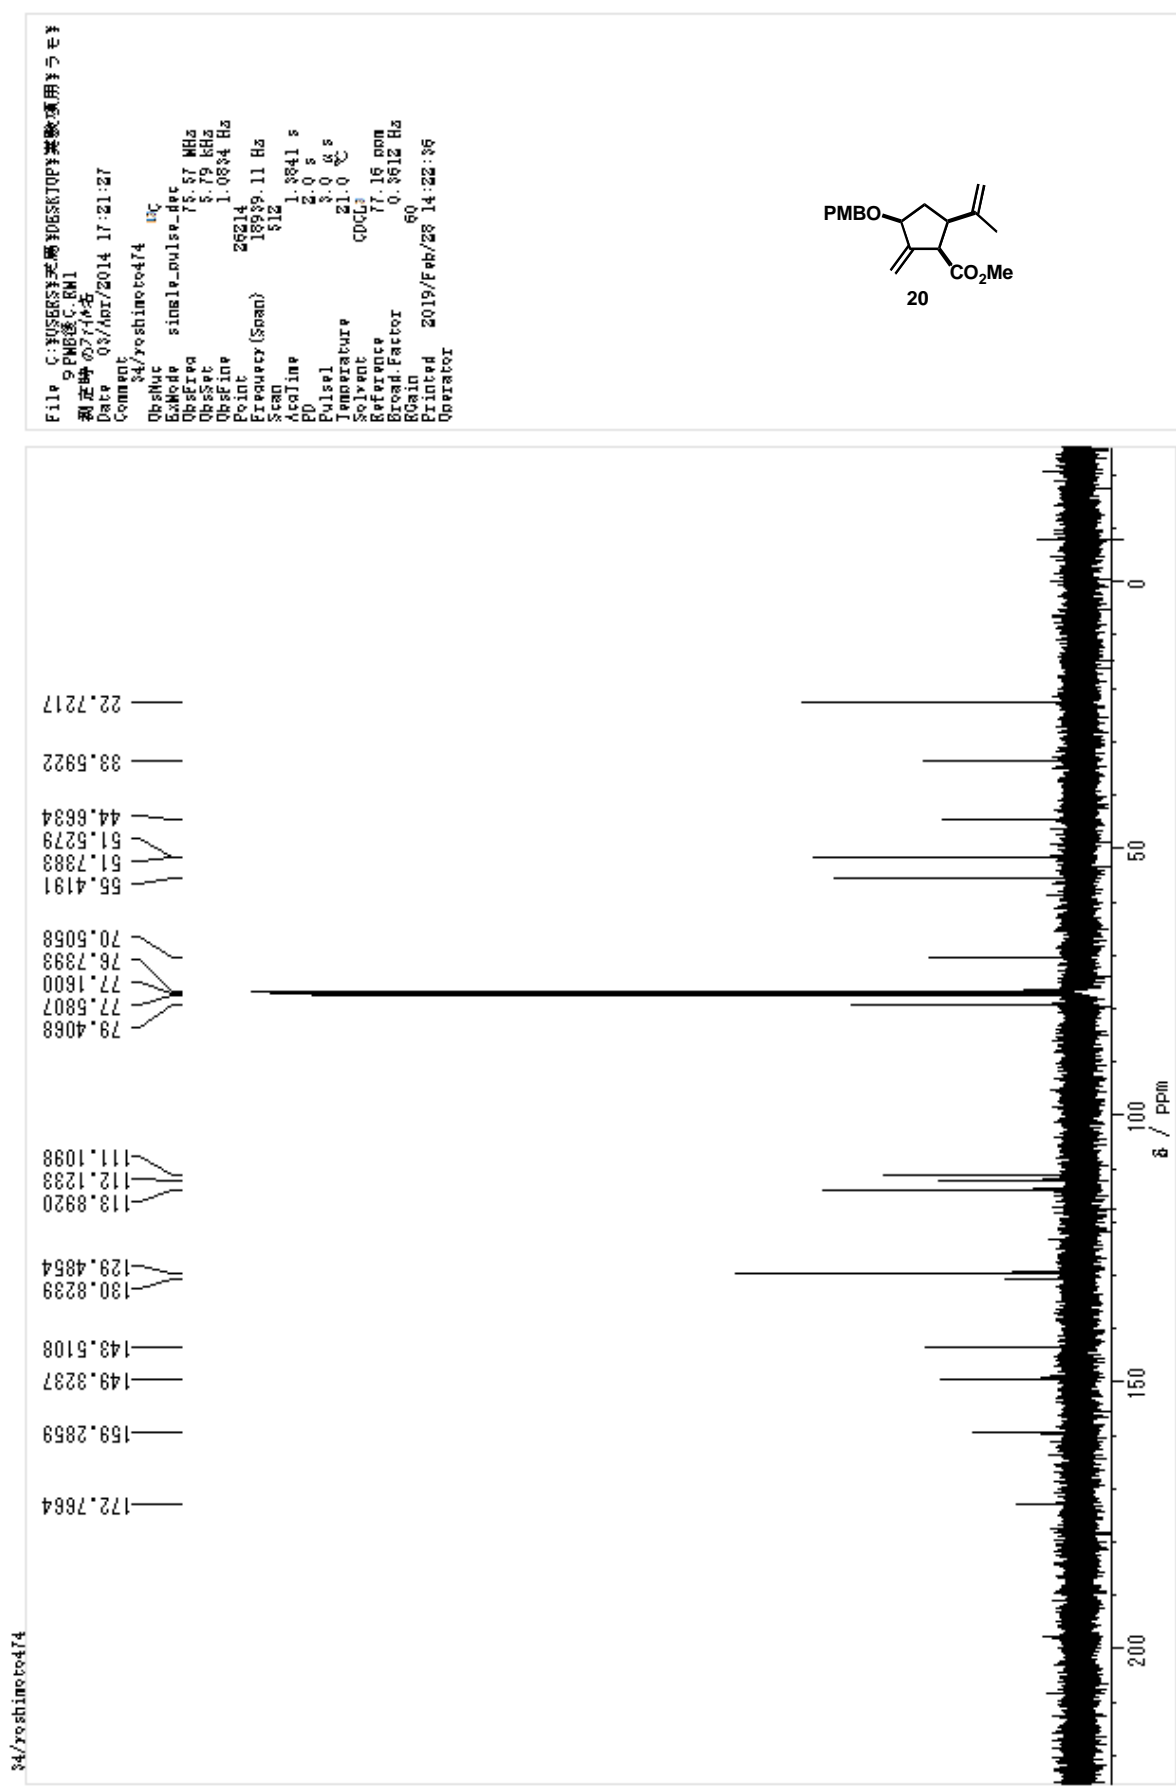

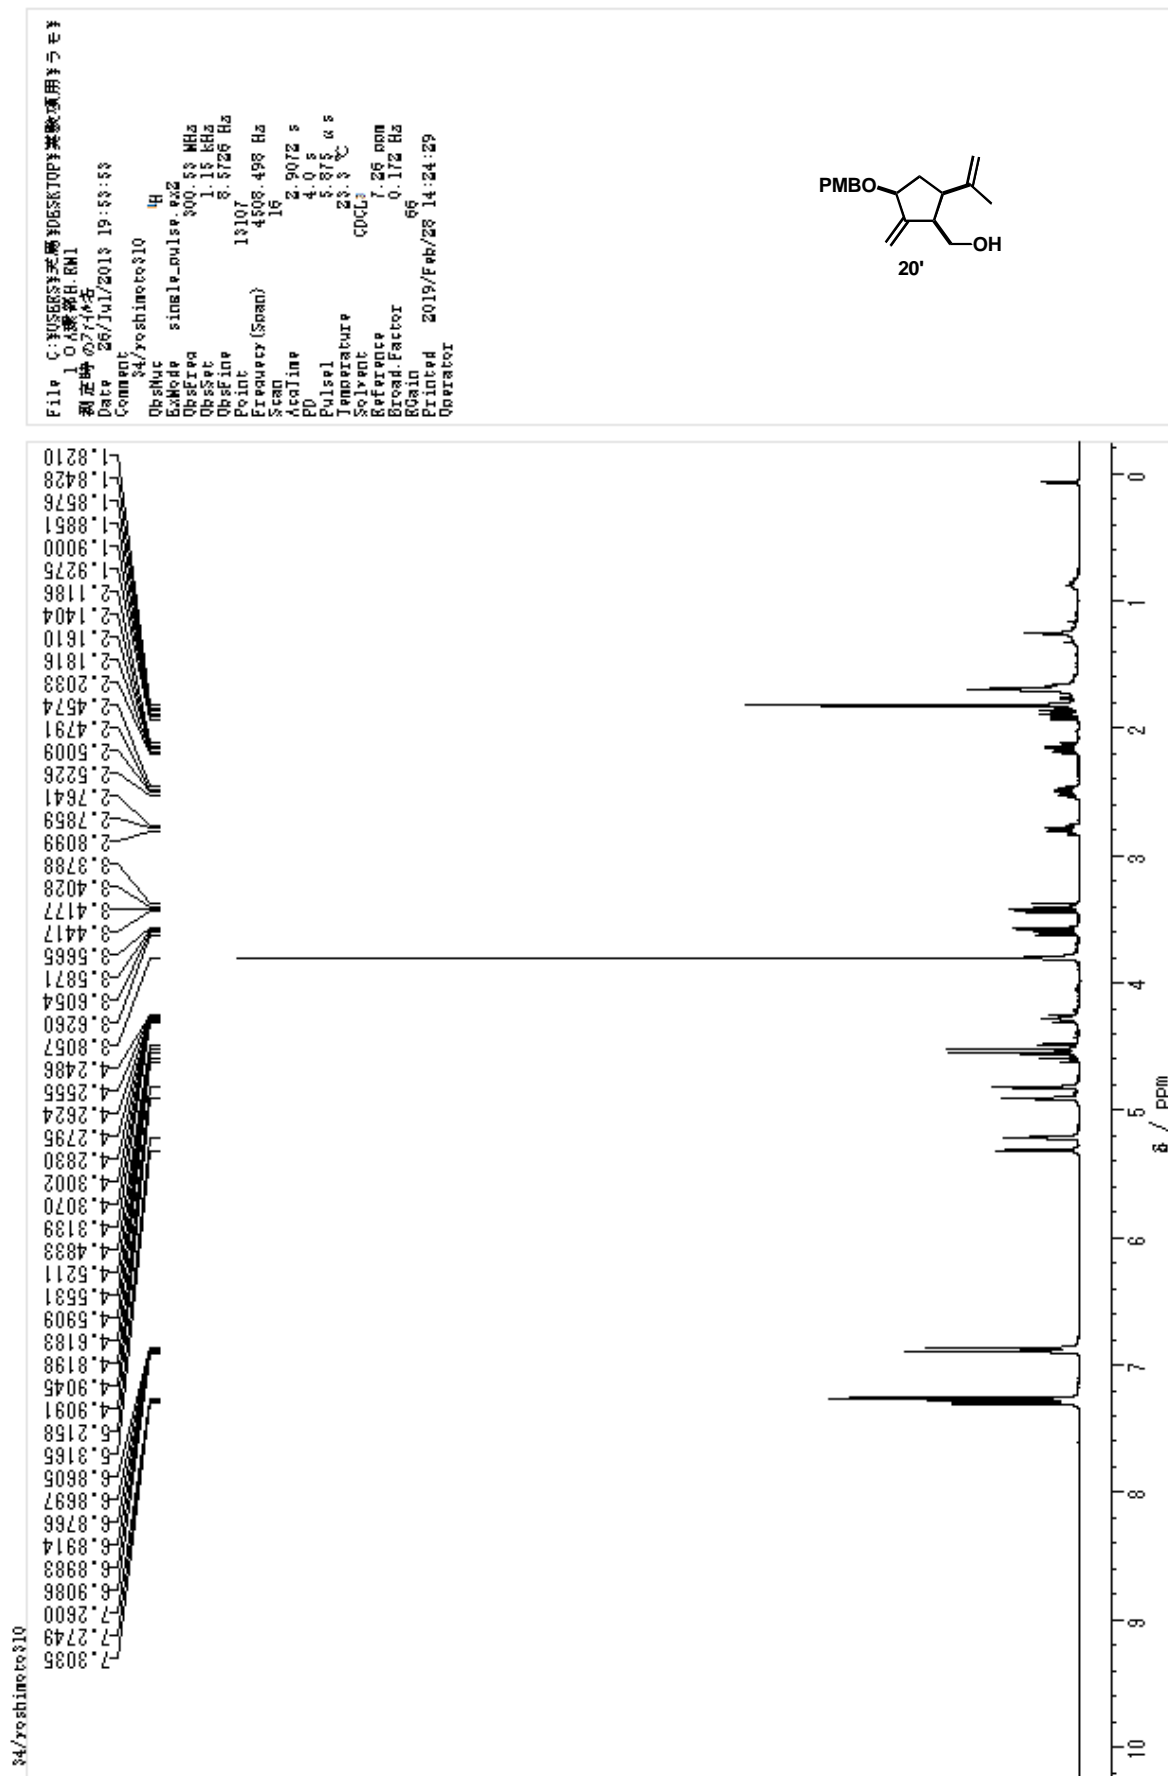

File C:\USER33\Desktop\DESKTOP\実験項目\ラモイ  
 1. O.A. 糖質 C. BM  
 測定機 7. 株式会社 日立 日立 NMR 日立カ - 科1 (60  
 4) 2019.12.11 18  
 Date 30/Dec/2019 00:00:00  
 Comment  
 nakamura604  
 ObsNut hC  
 ExpMode ZQPGR0  
 ObsFreq 100.61 MHz  
 ObsP1 0.0 kHz  
 ObsP2 999.688 Hz  
 Point 32768  
 Frequency (Scan) 24038.46 Hz  
 Scan 0  
 Acquire 1.3651 s  
 PD 0.0 s  
 Pulse 10.0 μs  
 Temperature 0.0 °C  
 Solvent CDCl<sub>3</sub>  
 Reference 77.1552 ppm  
 Broad.Factor 0.3668 Hz  
 RGain 0  
 Printed 2019/Feb/28 14:25:47  
 Operator

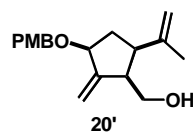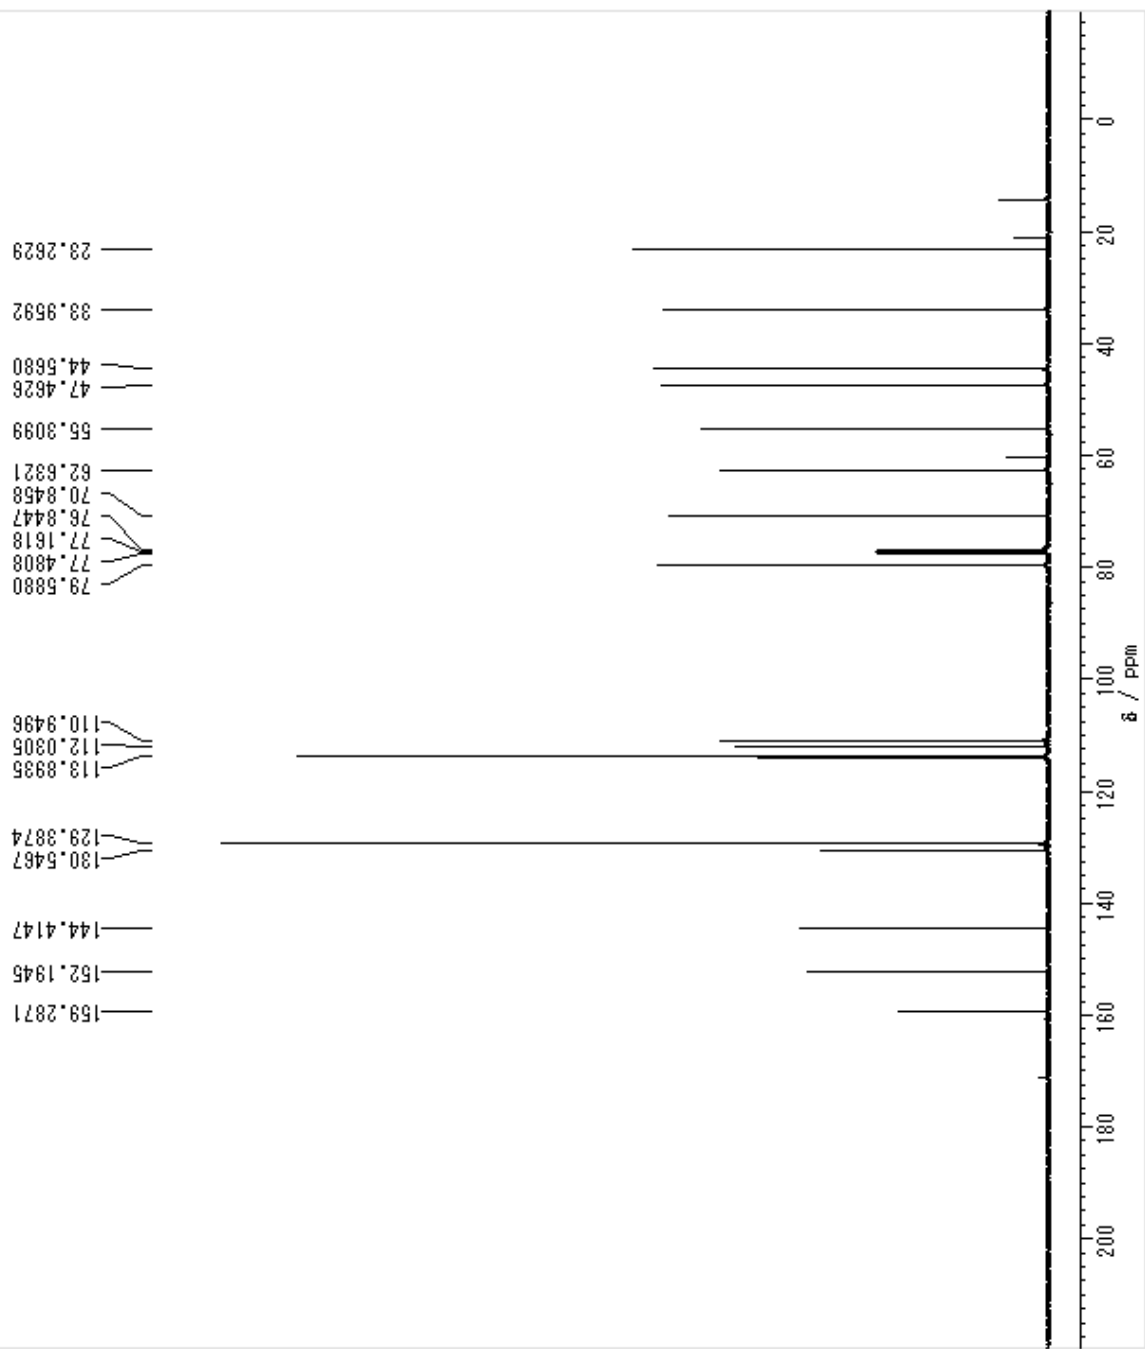

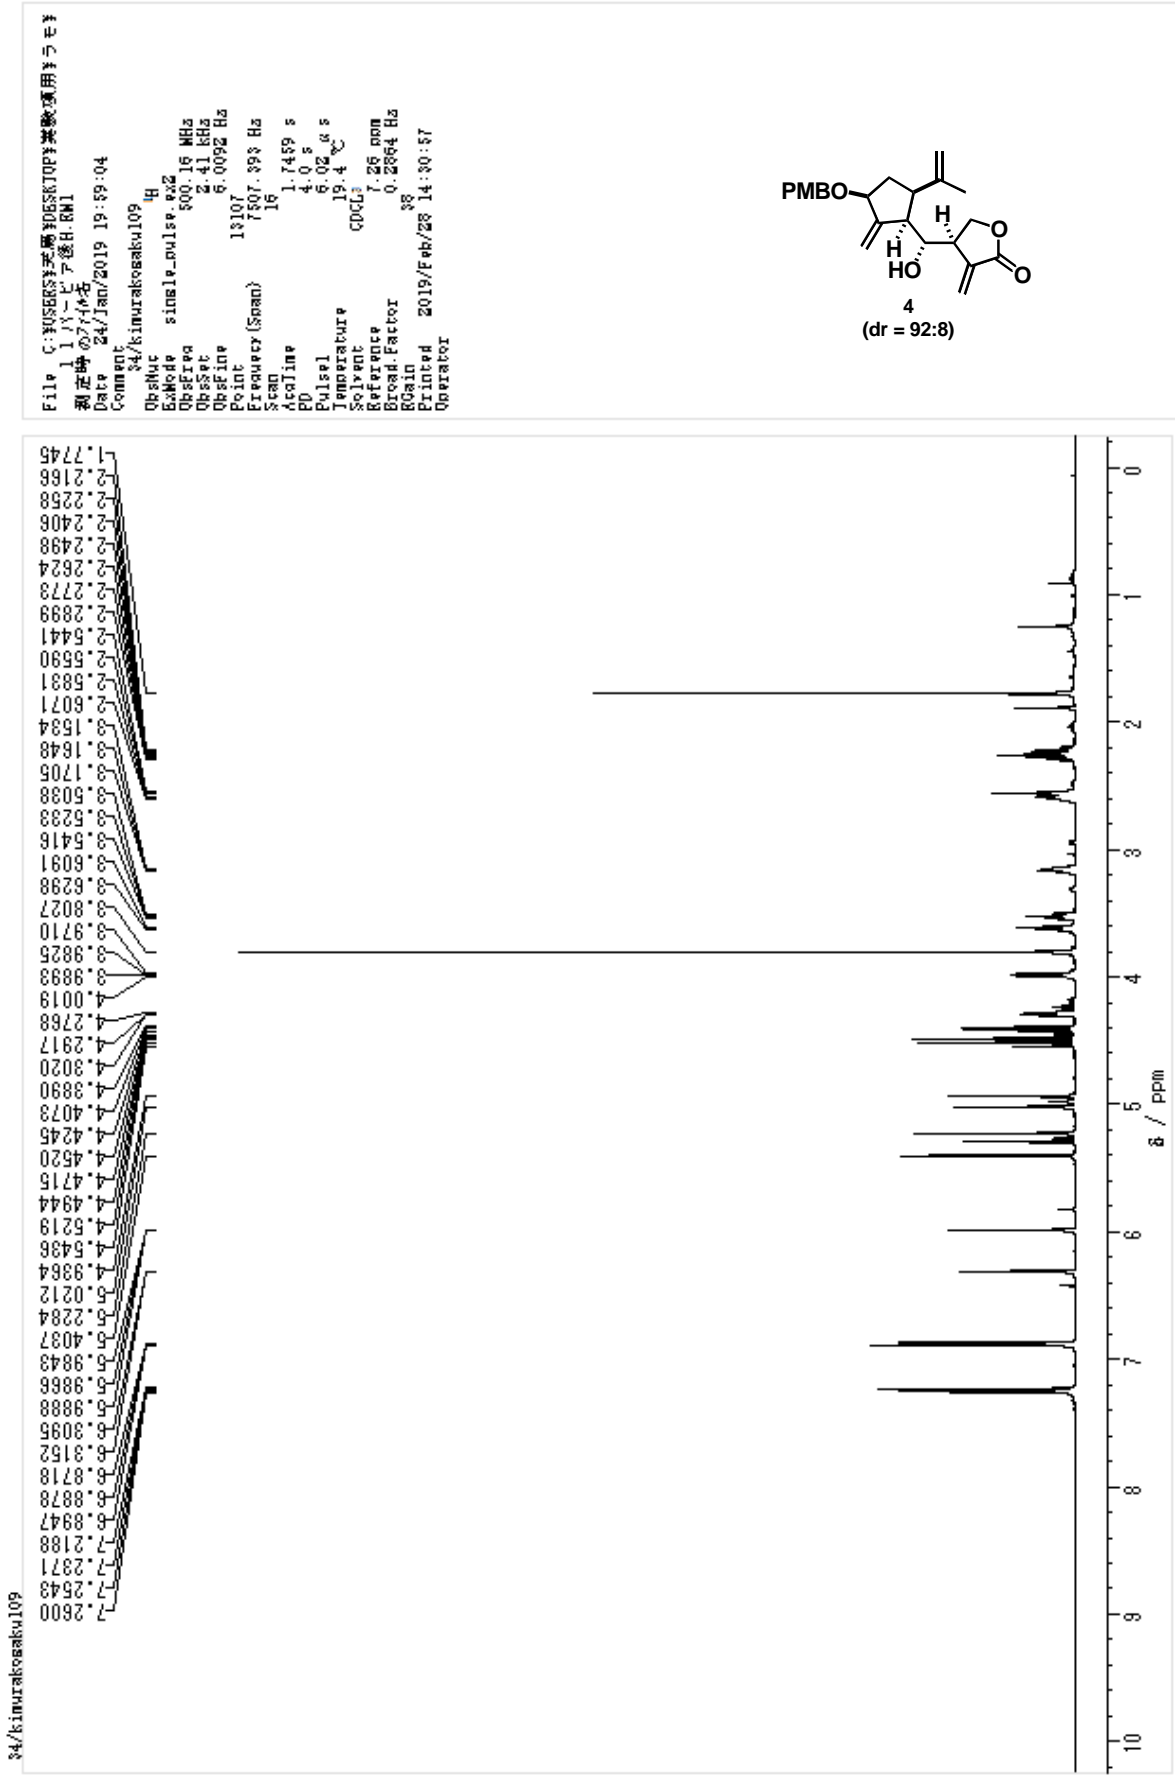



34/kinurakoaaku109

File C:\USER35\Desktop\TOP\実験項目\54モヤ  
11V-ピエ後C.FM1  
測定機名  
Date 24/Jam/2019 23:13:15  
Comment  
34/kinurakoaaku109  
ObsNut  
ExpMode single\_pulse\_rec  
ObsFreq 125.77 MHz  
ObsRes 7.87 kHz  
ObsLine 4.2131 Hz  
Point 26214  
Frequency (Scan) 31446.06 Hz  
Scan 4096  
AcqTime 0.8386 s  
PD 2.0 s  
Pulse 3.8887 us  
Temperature 19.6 °C  
Solvent CDCl<sub>3</sub>  
Reference 77.16 ppm  
Broad.Factor 0.5998 Hz  
RGain 54  
Printed 2019/Feb/28 14:31:46  
Operator

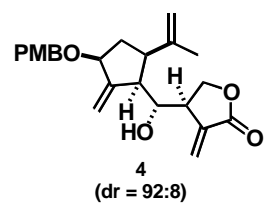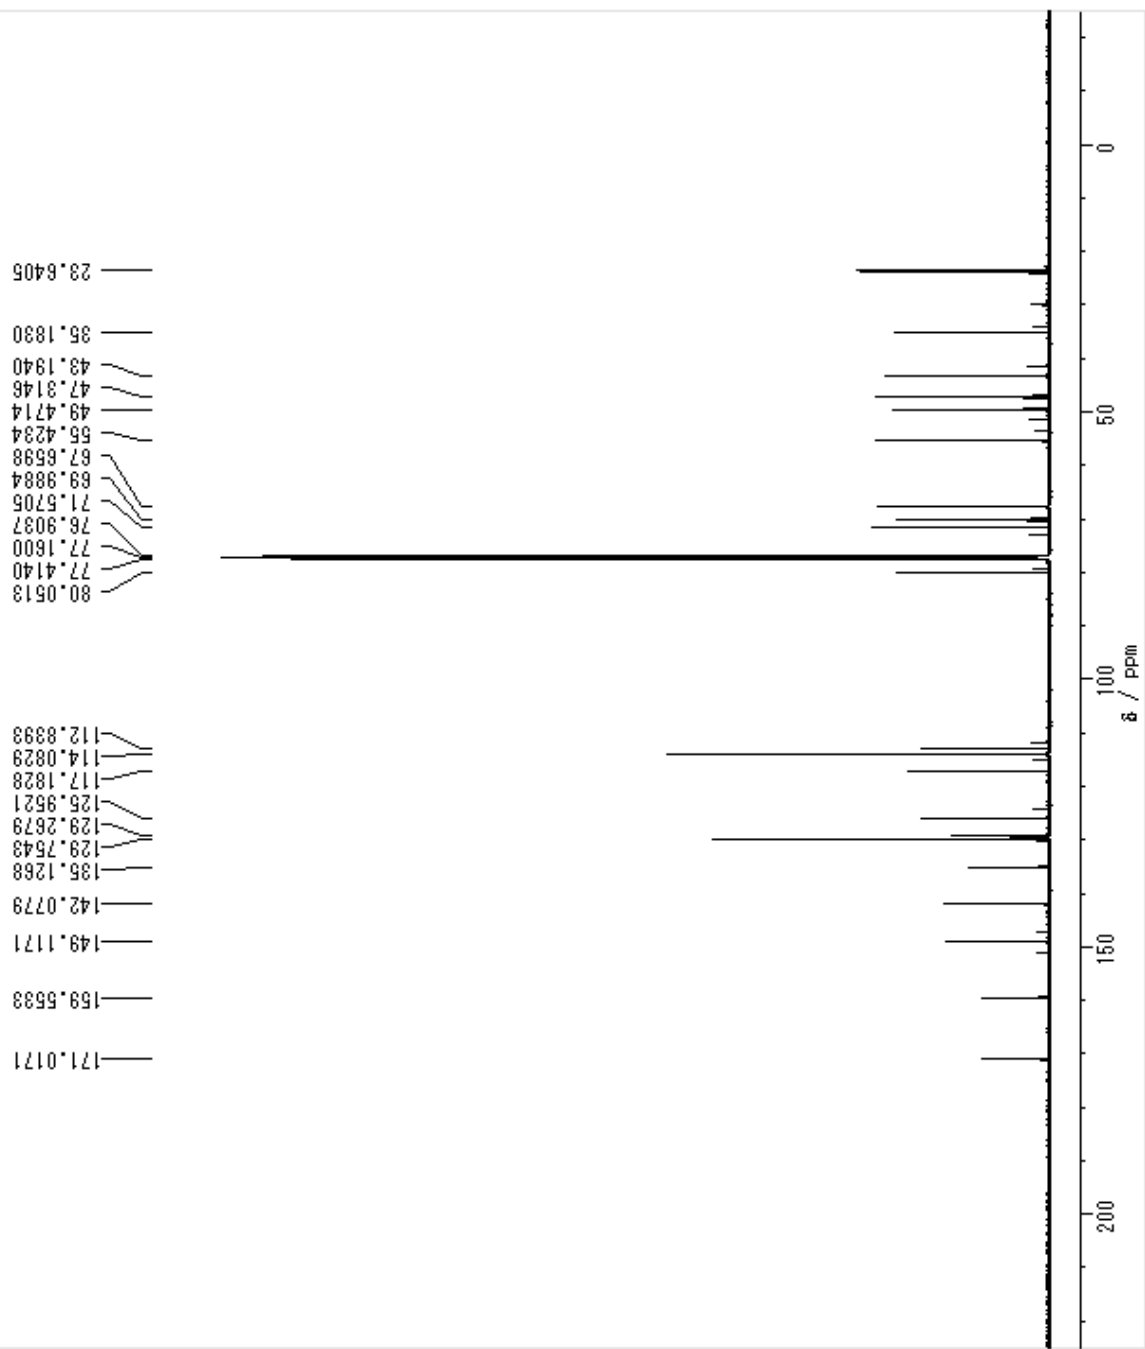

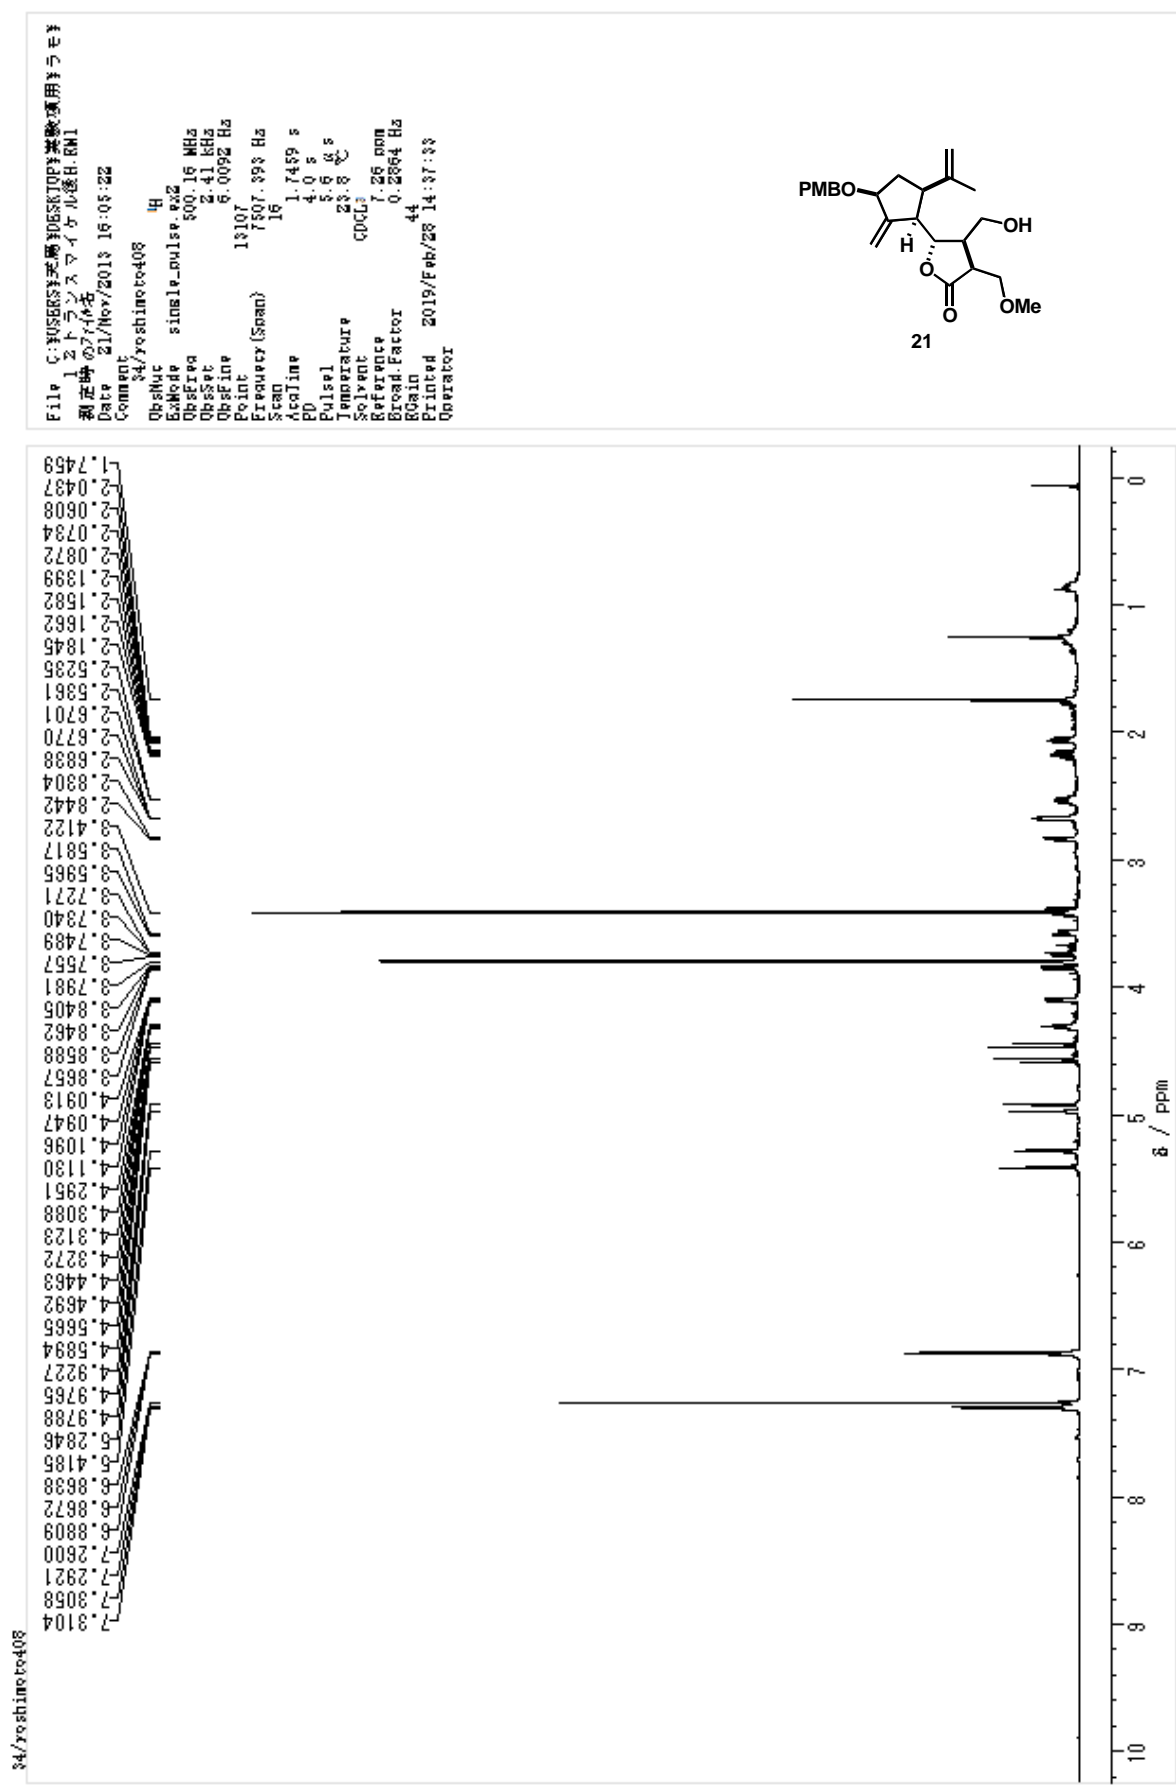

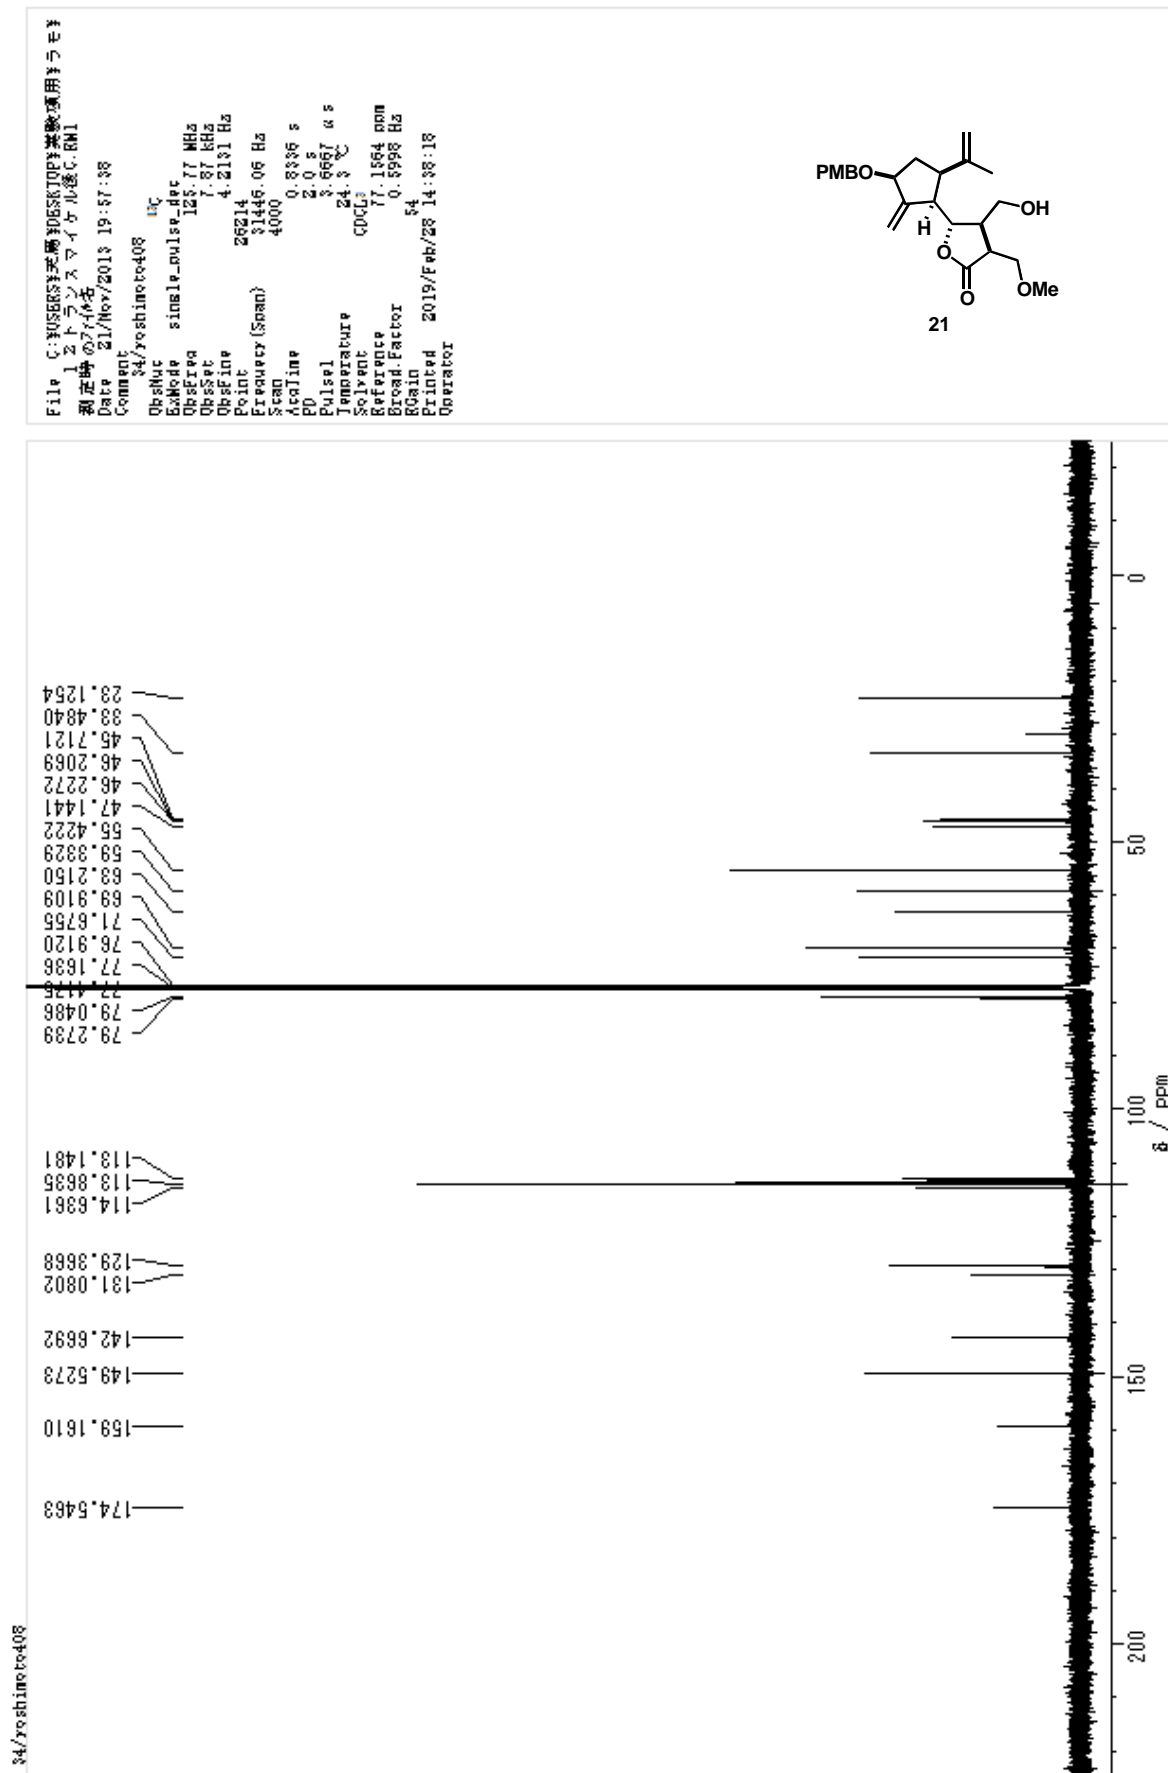

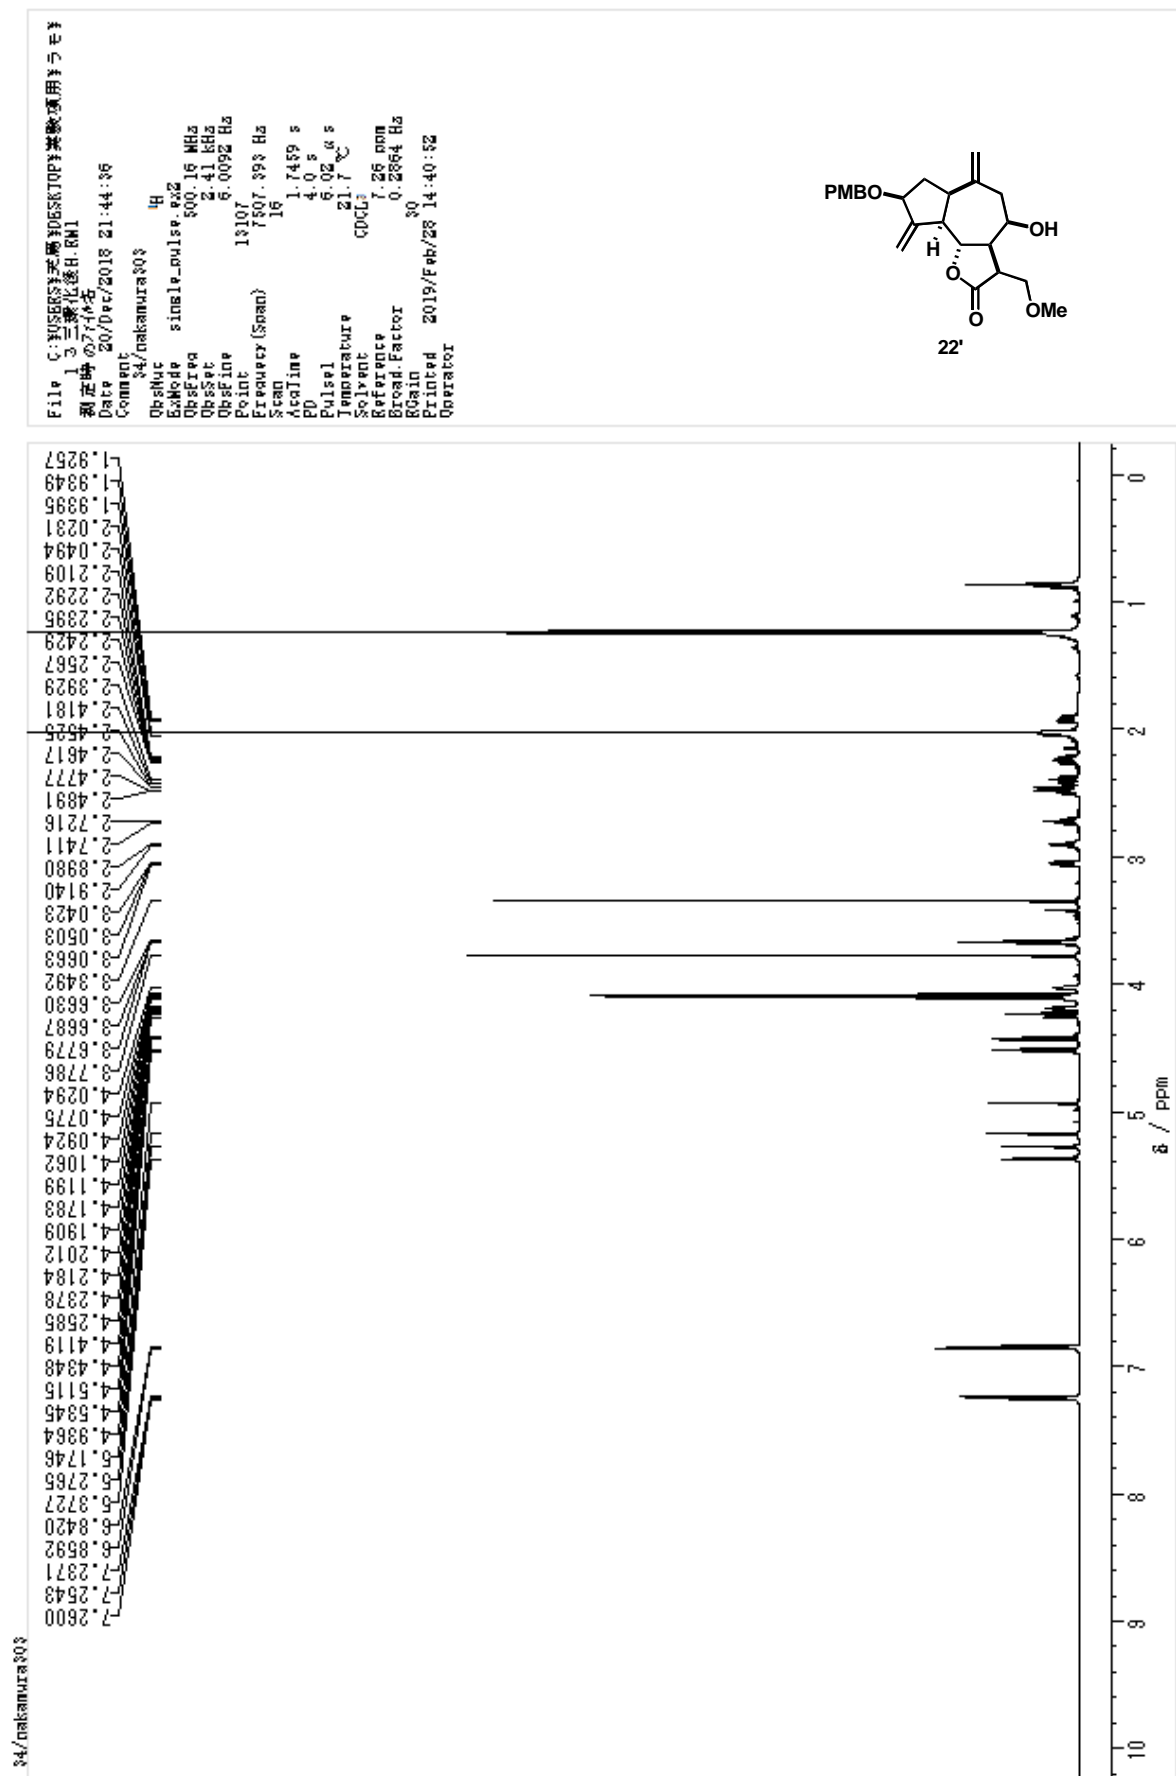

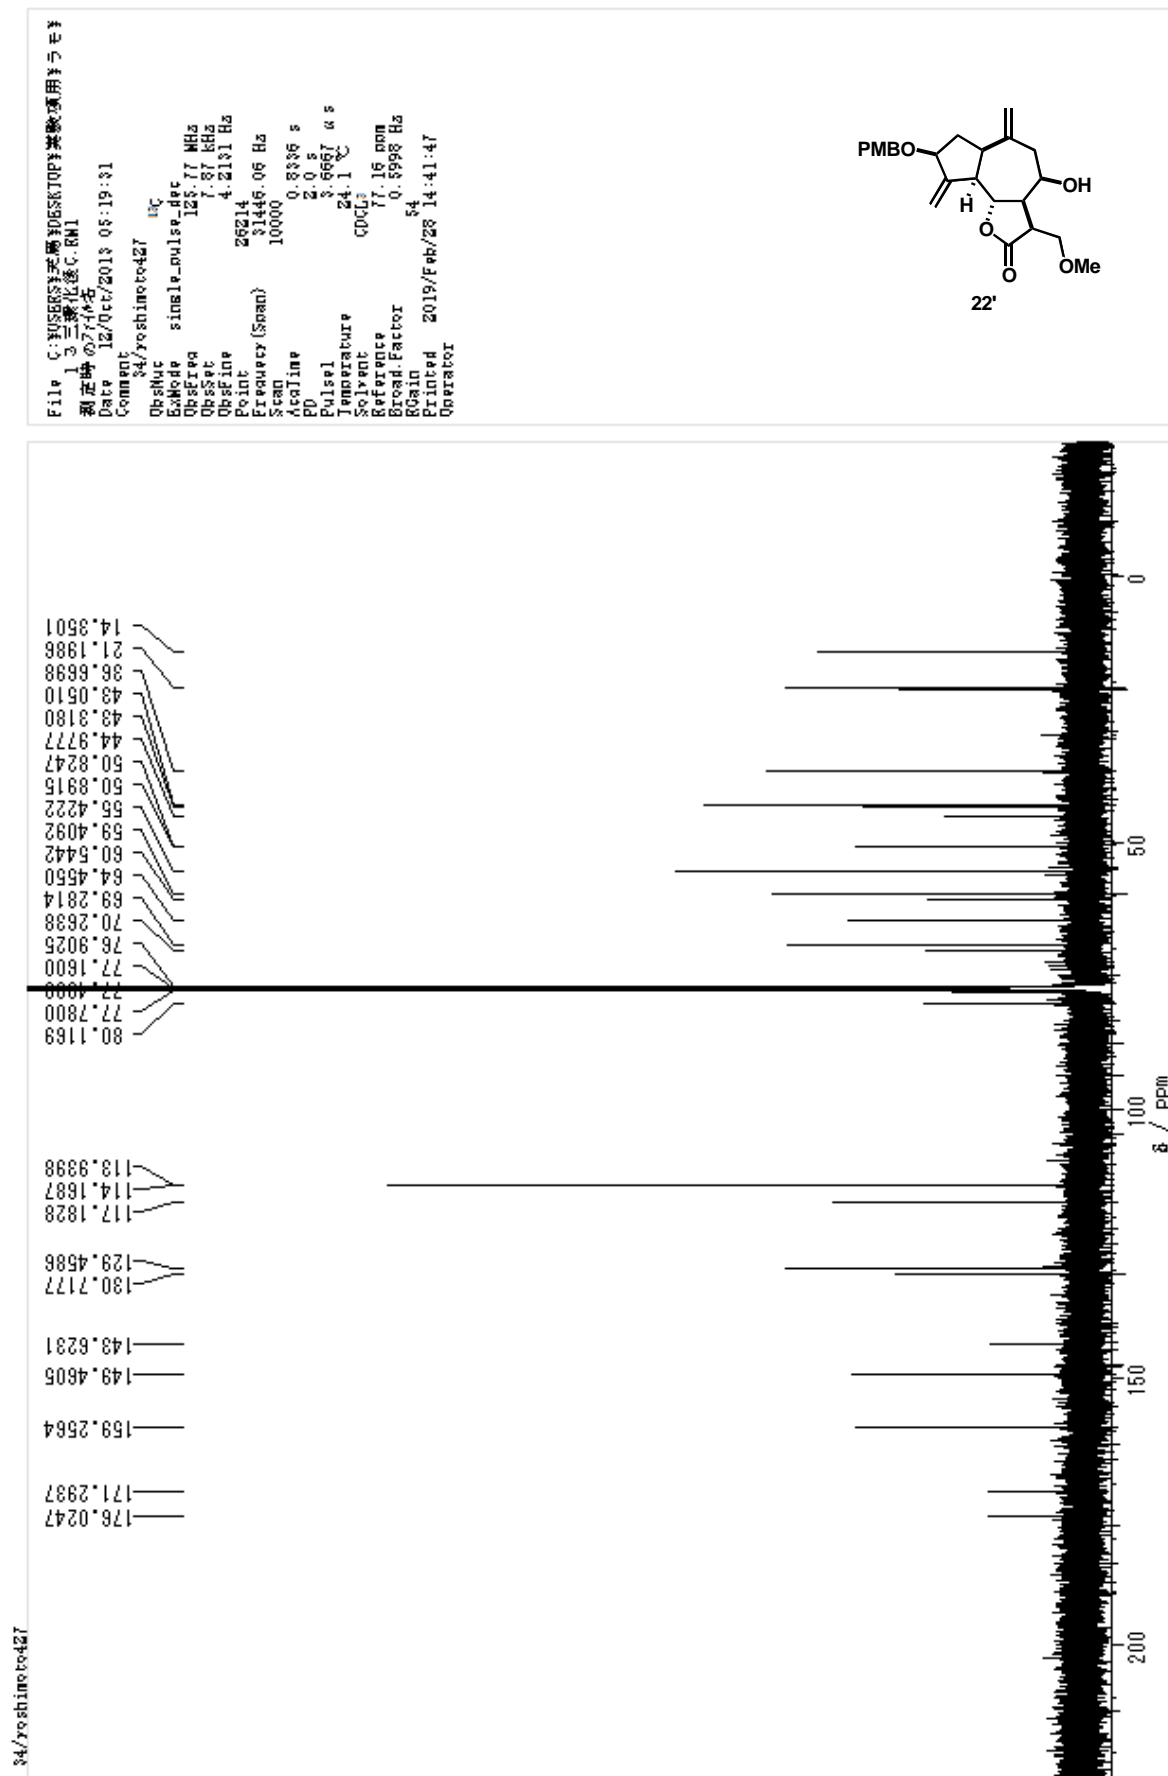

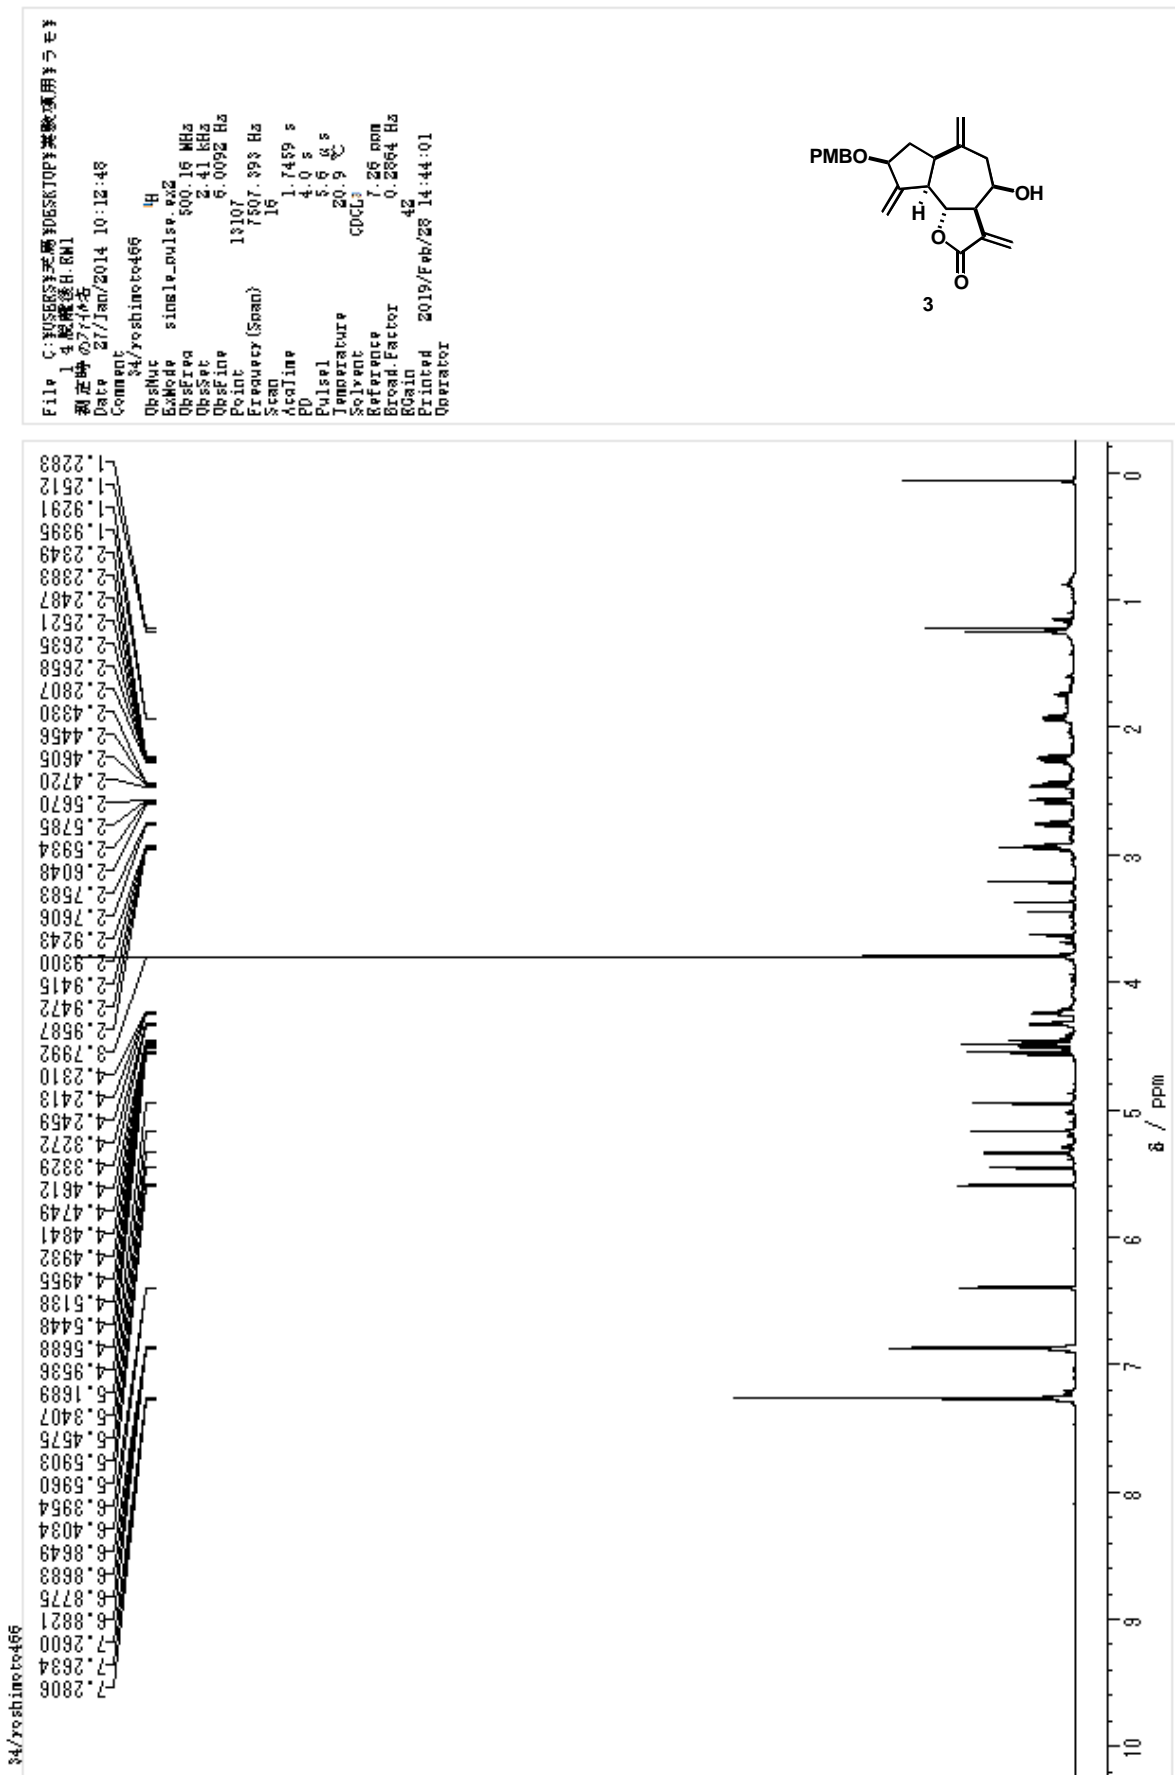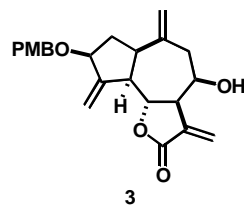

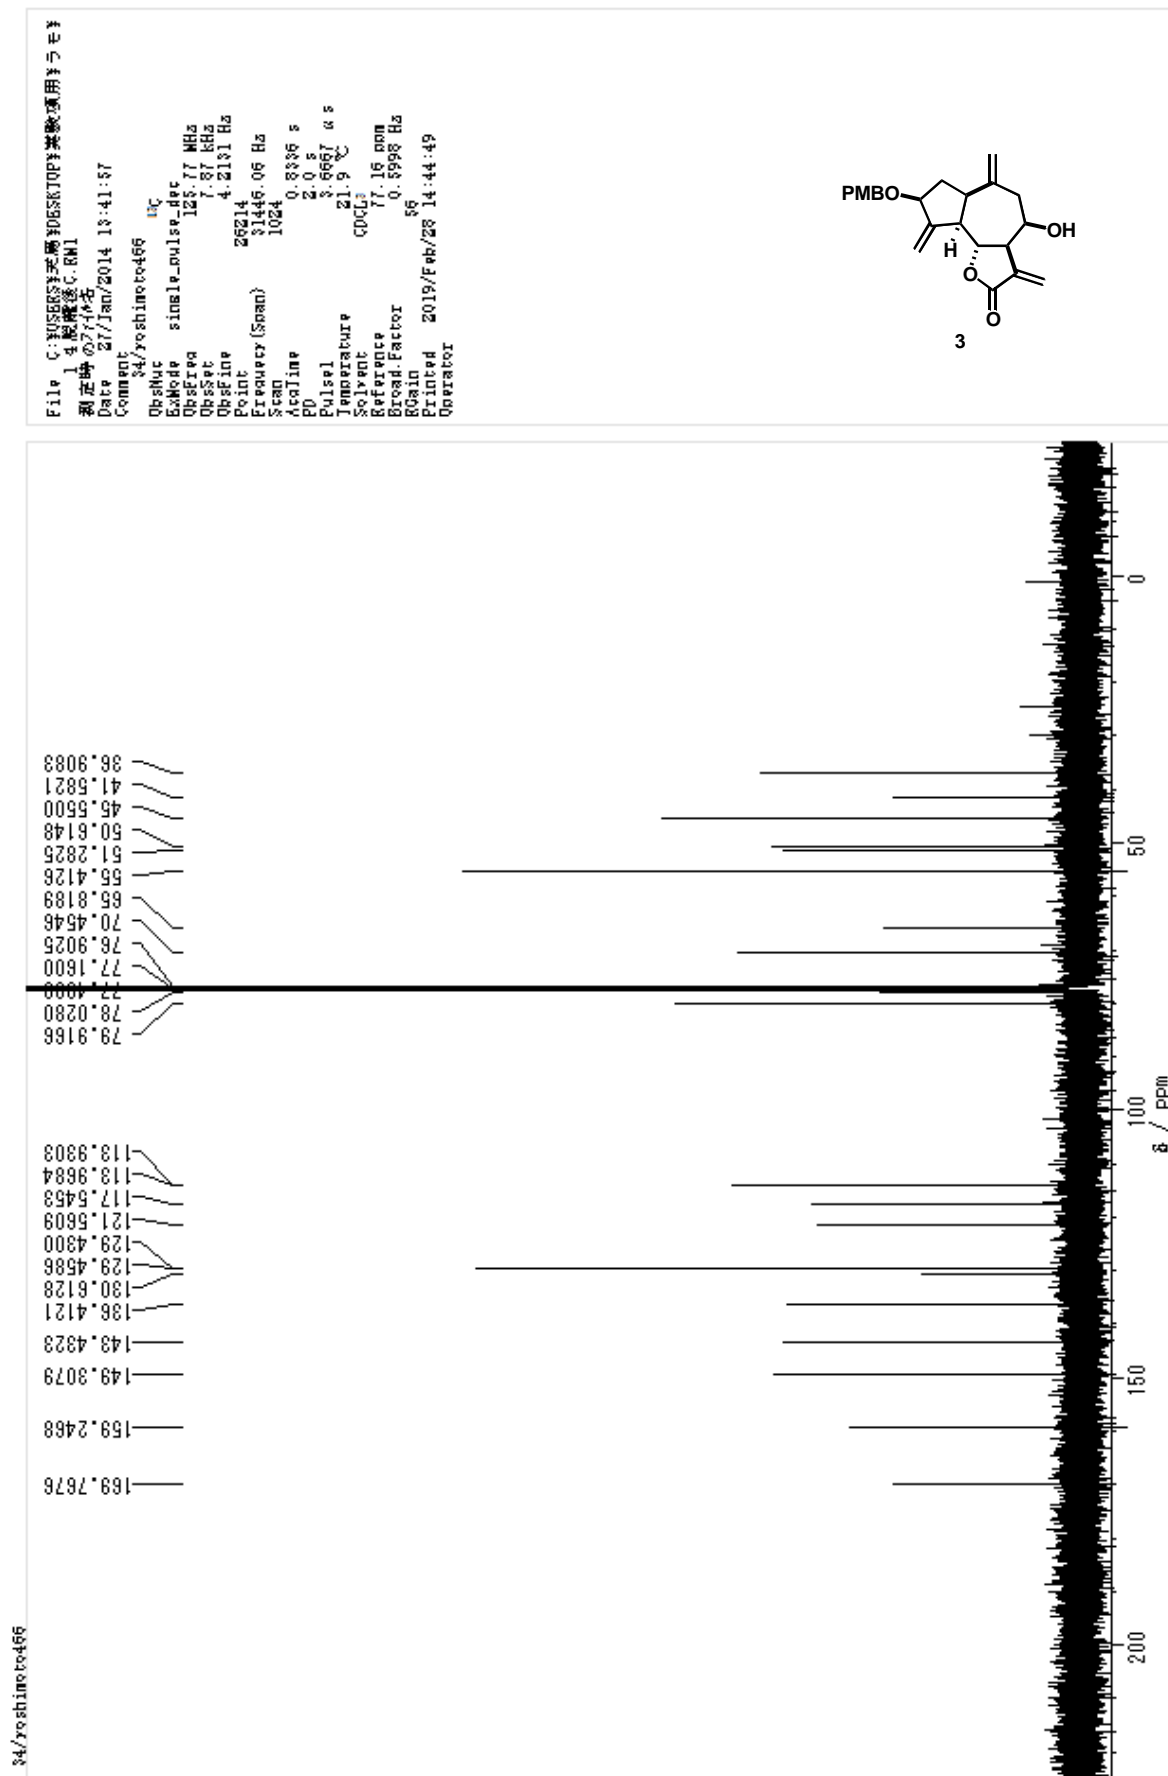

s4/nakamura236

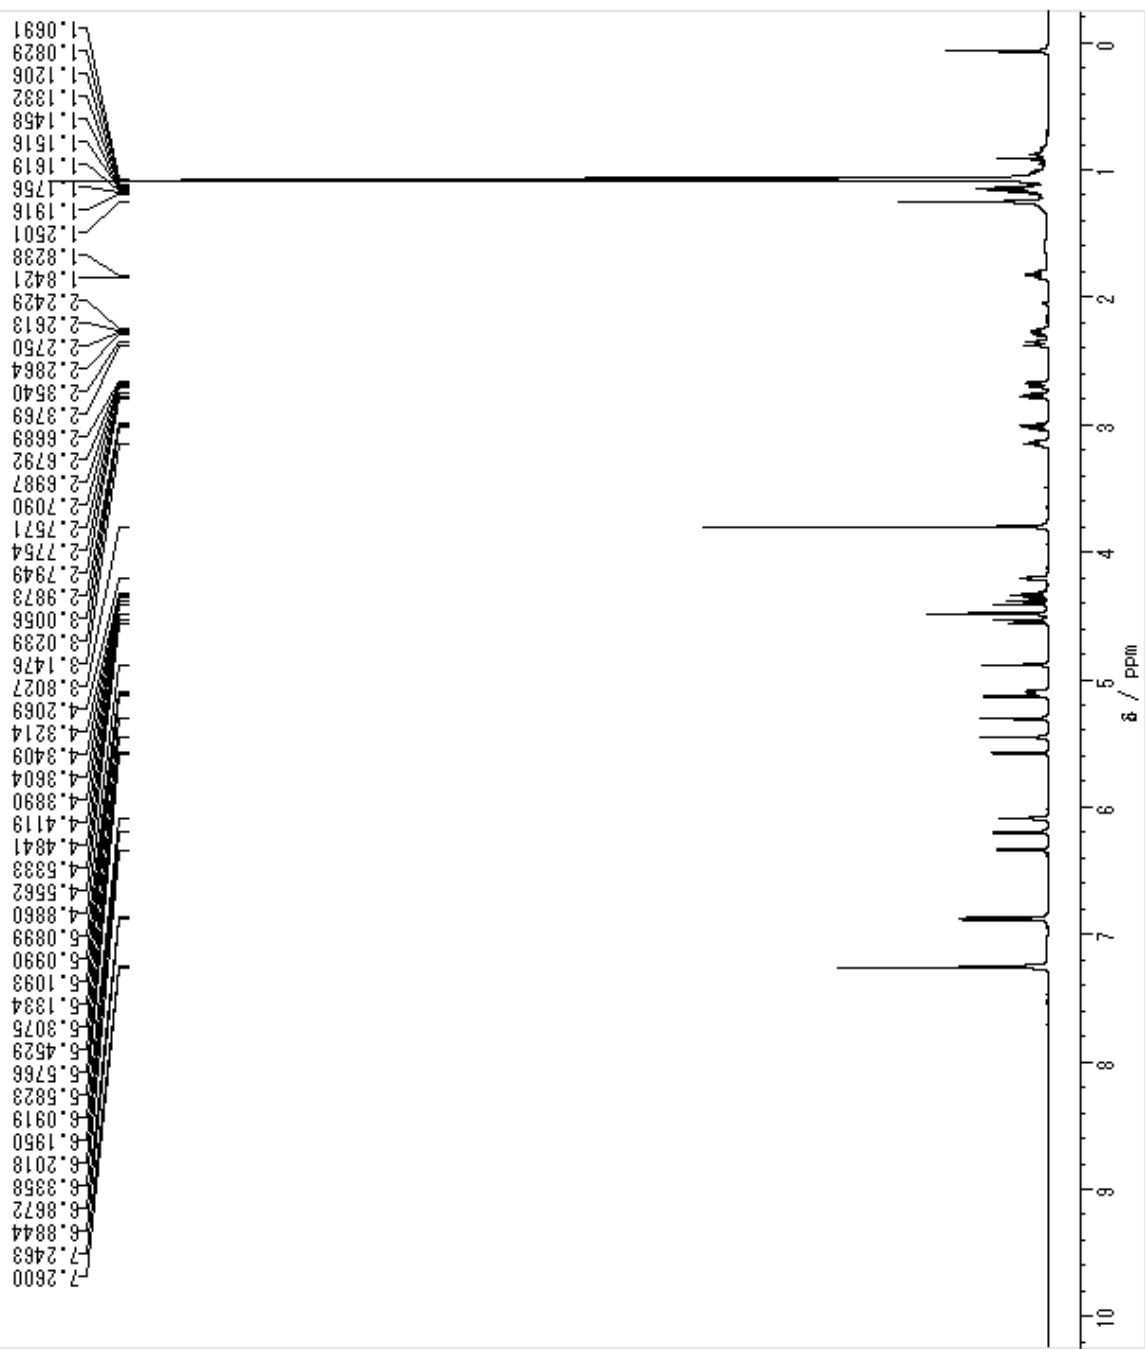

File: C:\USER\S4\WORK\305\SKTOP\実験項目\50504  
 測定機名: JEOL-ECZ500  
 Date: 21/Jun/2019 20:29:17  
 Comment: s4/nakamura236  
 QbSet: H  
 ExMode: single\_pulse\_ex2  
 QbFreq: 500.16 MHz  
 QbSFreq: 2.41 kHz  
 QbSFine: 6.0092 Hz  
 Point: 13107  
 Frequency (Scan): 7507.998 Hz  
 Scan: 16  
 AcqTime: 1.7459 s  
 PD: 4.0 s  
 Pulse1: 6.02 μs  
 Temperature: 19.3 °C  
 Solvent: CDCl<sub>3</sub>  
 Reference: 7.26 ppm  
 Broad.Factor: 0.2864 Hz  
 RGain: 44  
 Printed: 2019/Feb/28 14:45:48  
 Operator

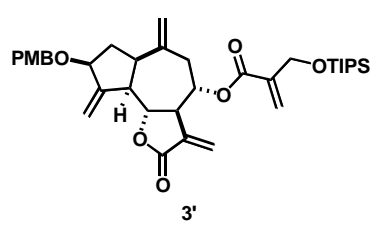



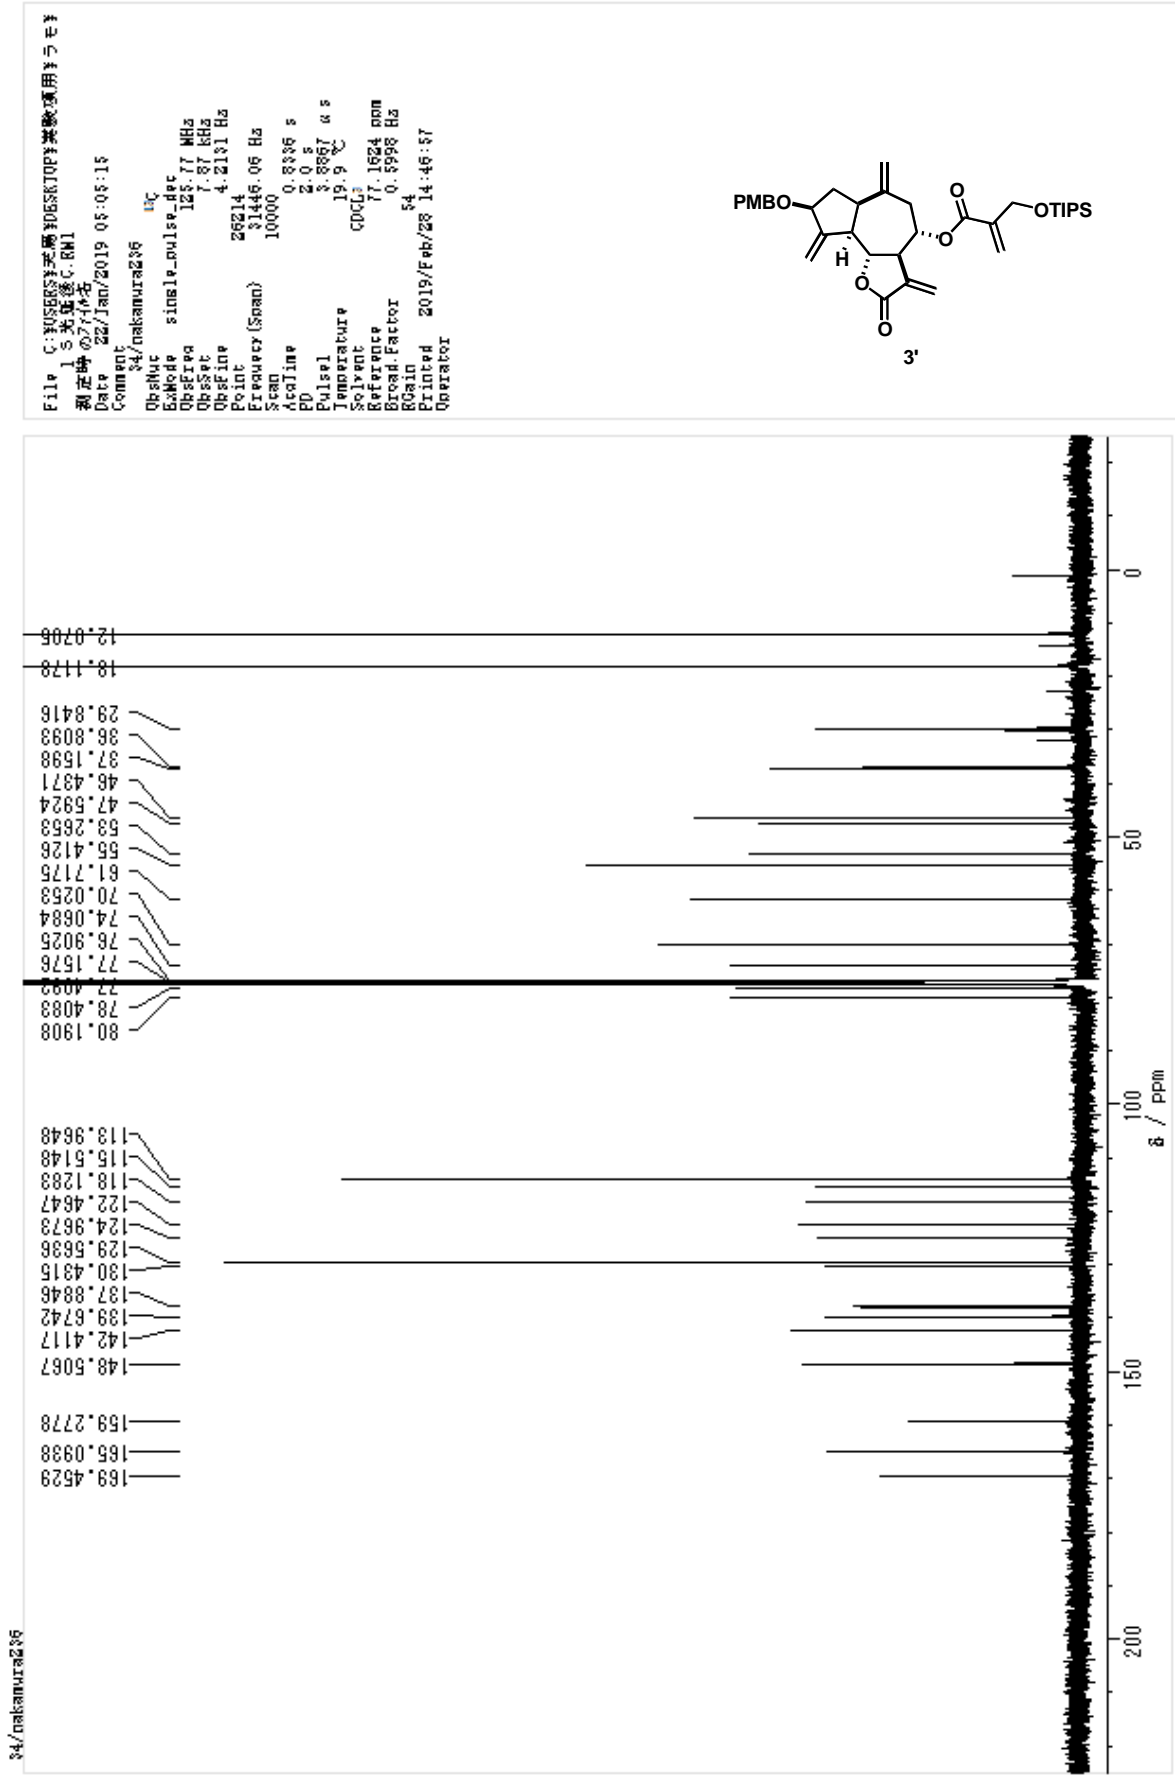

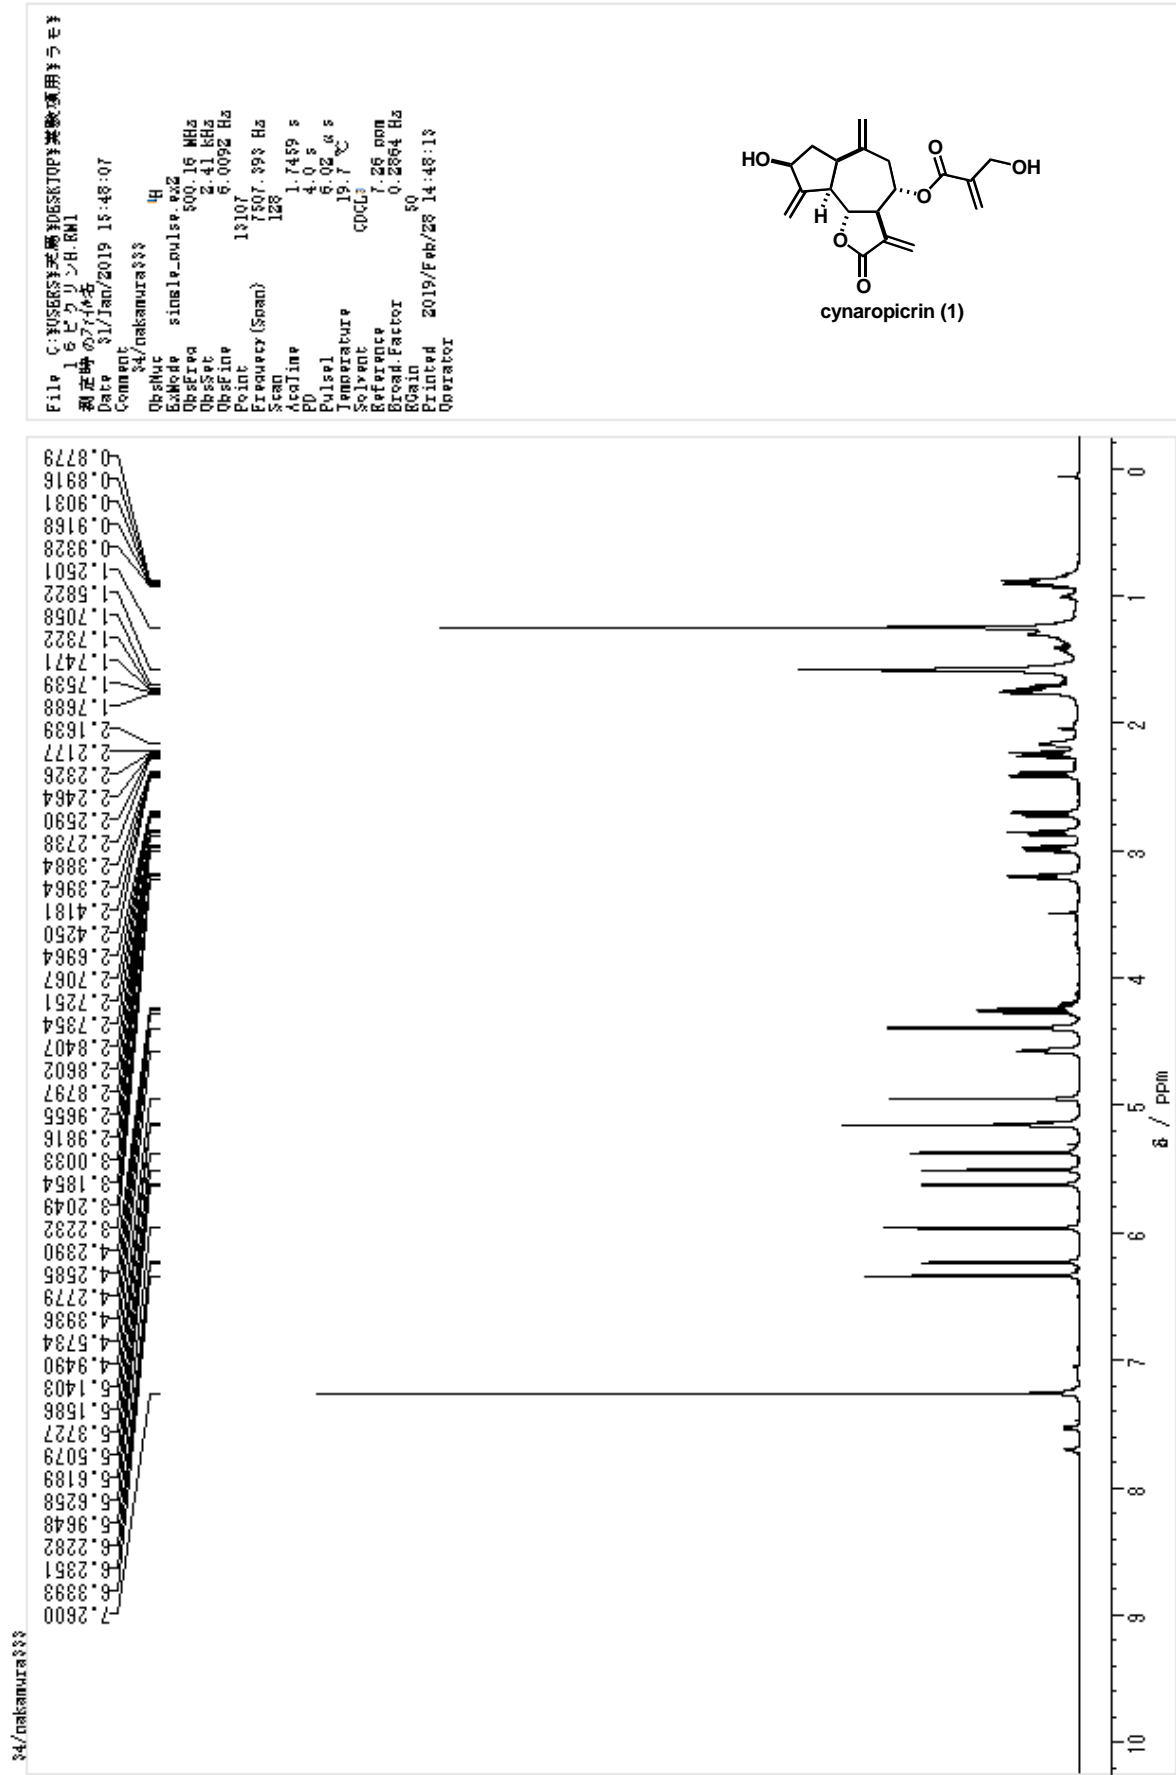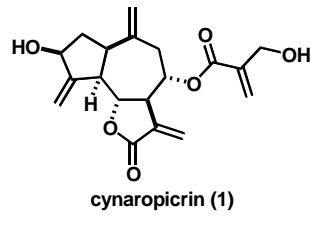

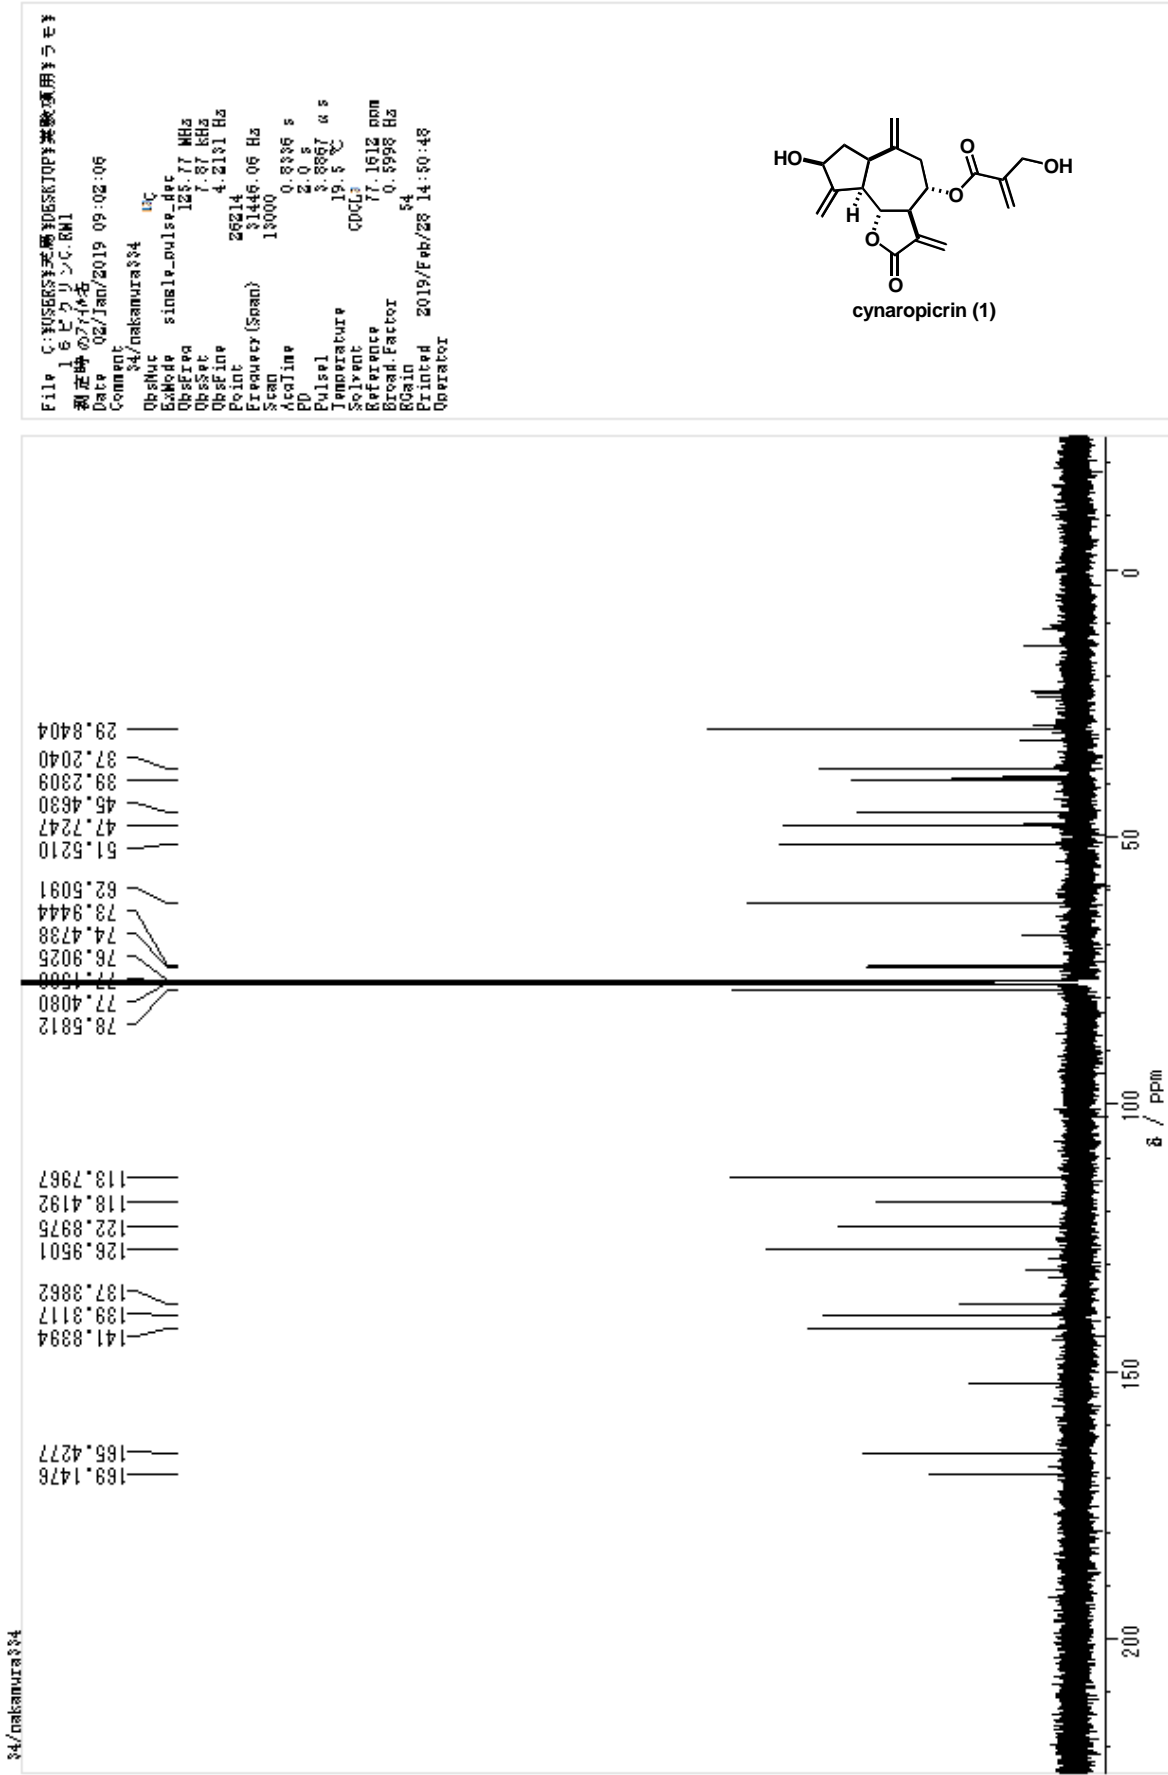

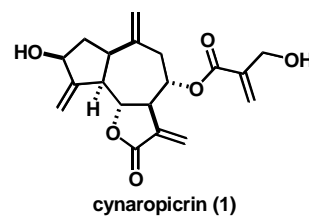

< <sup>1</sup>H NMR >

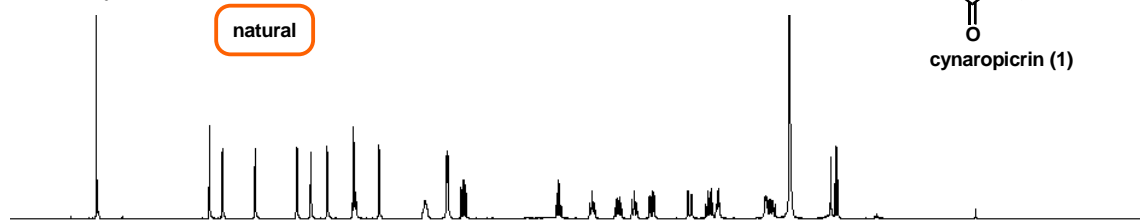

34/nakamura333

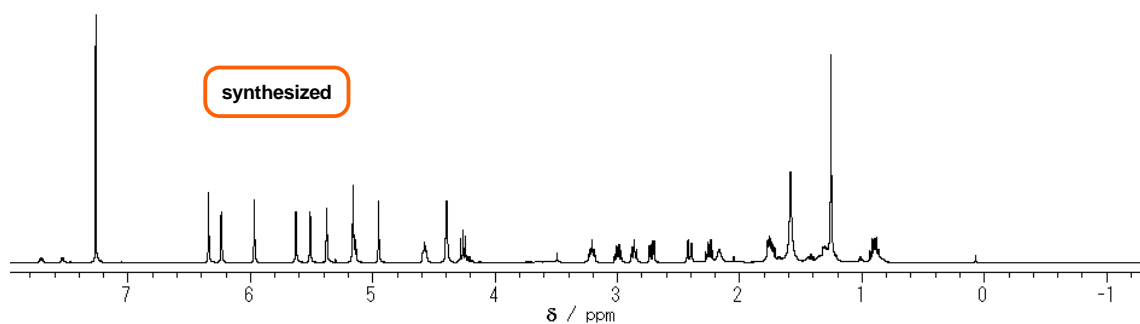

< <sup>13</sup>C NMR >

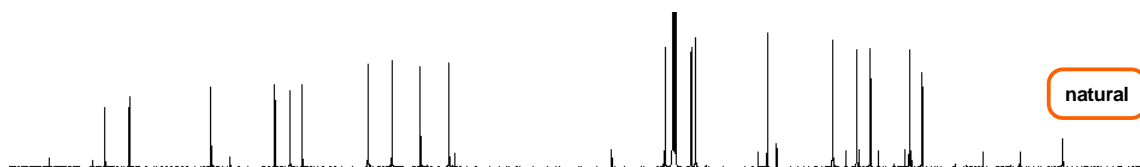

34/nakamura334

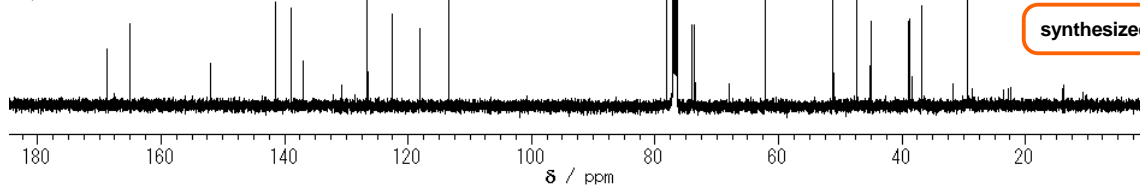

**X-ray diffraction analysis of S1:**

Crystals were obtained from a hexane solution by slow evaporation of the solvent. A colorless platelet crystal ( $0.35 \times 0.30 \times 0.03$  mm) was mounted on a polyimide film, MicroMounts™ (MiTegen), and coated with paraffin. All measurements were made on a Rigaku Mercury70 diffractometer using graphite monochromated Mo- $K\alpha$  radiation at 223K. Data were collected and processed using CrystalClear (Rigaku).<sup>1</sup> The structure was solved by direct methods<sup>2</sup> and expanded using Fourier techniques. A unit cell contained two independent molecules whose structures are almost identical. The non-hydrogen atoms were refined anisotropically. Hydrogen atoms were refined using the riding model. The final cycle of full-matrix least-squares refinement on  $F^2$  was based on 7316 observed reflections and 547 variable parameters. All calculations were performed using the CrystalStructure<sup>3</sup> crystallographic software package except for refinement, which was performed using SHELXL97.<sup>4</sup> Crystallographic data are summarized in table S1. CIF data were deposited in Cambridge Structural Database (CCDC-2038598).

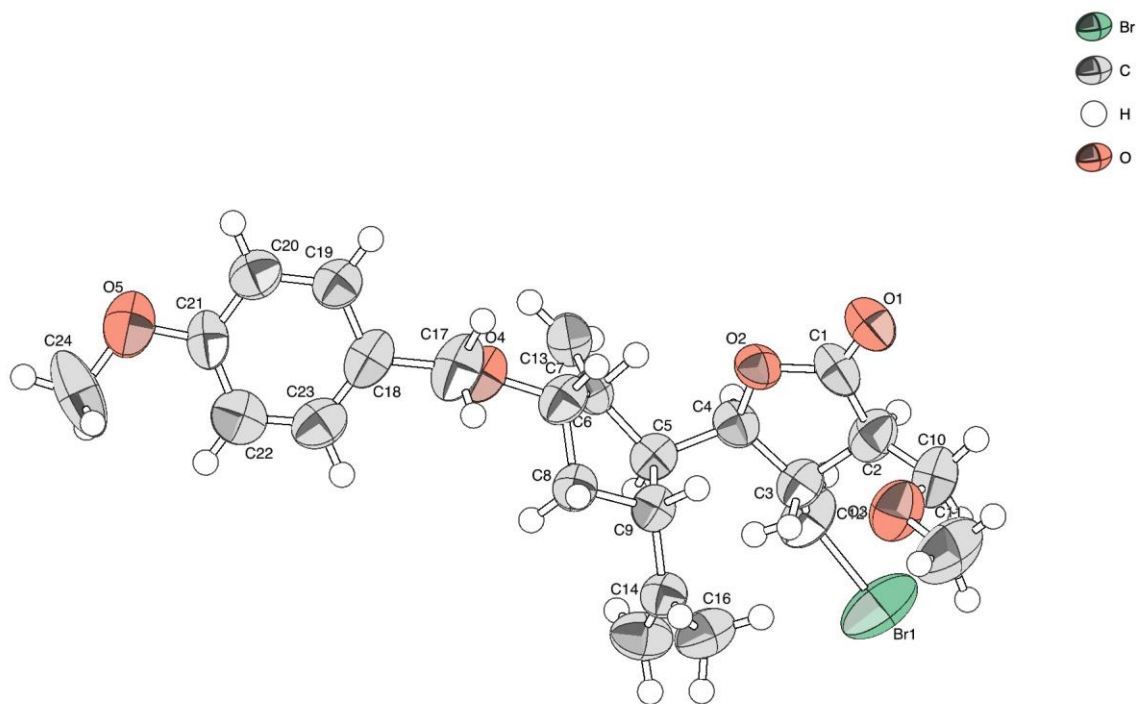

Figure S1. Molecular structure of S1. Draws with 50% probability.

Table S1. Crystal data and structure refinement for **S1**.

|                             |                                                                                                                                                                                                               |
|-----------------------------|---------------------------------------------------------------------------------------------------------------------------------------------------------------------------------------------------------------|
| Empirical Formula           | C <sub>24</sub> H <sub>31</sub> BrO <sub>5</sub>                                                                                                                                                              |
| Formula Weight              | 479.41                                                                                                                                                                                                        |
| Crystal Color, Habit        | colorless, platelet                                                                                                                                                                                           |
| Crystal Dimensions          | 0.35 × 0.30 × 0.03 mm                                                                                                                                                                                         |
| Crystal System              | triclinic                                                                                                                                                                                                     |
| Lattice Type                | Primitive                                                                                                                                                                                                     |
| Space Group                 | P1 (#1)                                                                                                                                                                                                       |
| Lattice Parameters          | $a = 8.703(13) \text{ \AA}$<br>$b = 9.329(14) \text{ \AA}$<br>$c = 14.17(2) \text{ \AA}$<br>$\alpha = 94.13(3)^\circ$<br>$\beta = 91.26(3)^\circ$<br>$\gamma = 90.13(2)^\circ$<br>$V = 1147(3) \text{ \AA}^3$ |
| Z value                     | 2                                                                                                                                                                                                             |
| Absorption coefficient      | 18.284 cm <sup>-1</sup>                                                                                                                                                                                       |
| Radiation                   | MoK $\alpha$ ( $\lambda = 0.71073 \text{ \AA}$ )<br>graphite monochromated                                                                                                                                    |
| Temperature                 | 223 K                                                                                                                                                                                                         |
| No. of Reflections Measured | Total: 10727<br>Unique: 7316<br>( $R_{\text{int}} = 0.0358$ )                                                                                                                                                 |
| Corrections                 | Lorentz-polarization Absorption<br>(trans. factors: 0.737 – 0.947)                                                                                                                                            |

*Electronic Supplementary Information*

|                                                       |                               |
|-------------------------------------------------------|-------------------------------|
| No. of Reflections                                    | 10727                         |
| No. Variables                                         | 547                           |
| Reflection/Parameter Ratio                            | 13.37                         |
| Residuals: $R$ ; $wR$ (All data)                      | 0.1182; 0.2234                |
| Residuals: $R_1$                                      | 0.0737                        |
| No. of Reflections to calc $R_1$                      | 3598                          |
| Goodness of Fit Indicator                             | 0.935                         |
| Flack Parameter                                       | -0.032 (Friedel pairs = 3296) |
| Max Shift/Error in Final Cycle                        | 0.000                         |
| Maximum peak in Final Diff. Map ( $e \text{ \AA}^3$ ) | 0.34                          |
| Minimum peak in Final Diff. Map ( $e \text{ \AA}^3$ ) | -0.73                         |
| CCDC#                                                 | 2038598                       |



**References:**

1. CrystalClear: Data Collection and Processing Software, Rigaku Corporation (1998-2015). Tokyo 196-8666, Japan.
2. SIR2008: Burla, M. C., Caliandro, R., Camalli, M., Carrozzini, B., Cascarano, G. L., De Caro, L., Giacovazzo, C., Polidori, G. Siliqi, D. and Spagna R. (2007). *J. Appl. Cryst.* **40**, 609-613.
3. CrystalStructure 4.2.5: Crystal Structure Analysis Package, Rigaku Corporation (2000-2017). Tokyo 196-8666, Japan.
4. SHELXL97: Sheldrick, G. M. (2008). *Acta Cryst. A* **64**, 112-122.

DFT calculation with B3LYP/6-31G\* for compound **S2**:

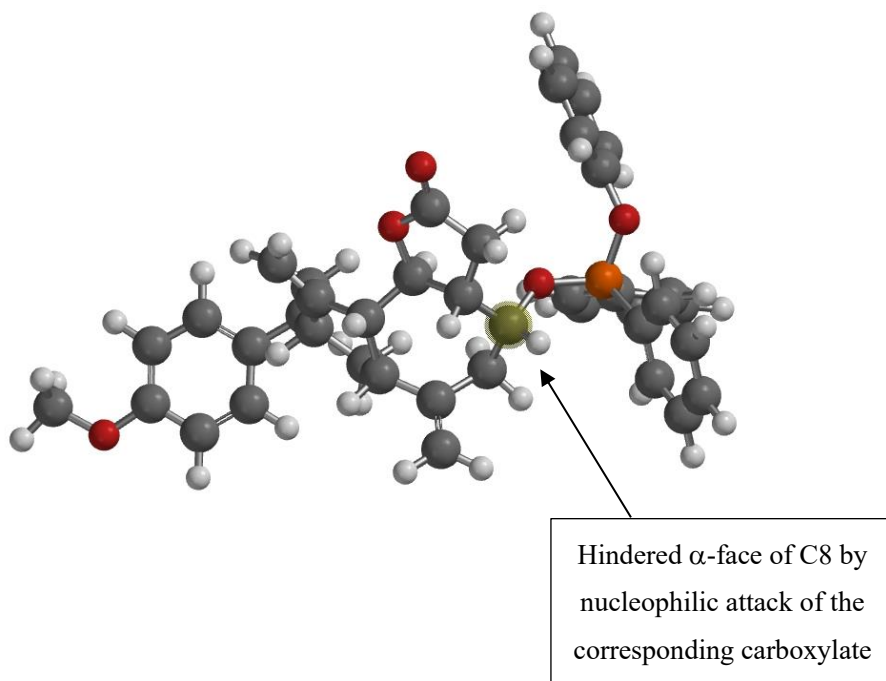

Supplement: d1ob00657f1.pdf [file d1ob00657f1.pdf]
